# Supplementary material for: 3-(4-Formylphenyl)-triazole functionalized coumarins as violet-blue luminophores and n-type semiconductors: synthesis, photophysical, electrochemical and thermal properties
Source: Royal Society of Chemistry journal article supplement (doi:10.1039/d2ra03266j), 2022-01-01
Supplement: d2ra03266j1.pdf [file d2ra03266j1.pdf]

## 3-(4-Formylphenyl)-triazole functionalized coumarins as violet-blue luminophores and n-type semiconductors: synthesis, photophysical, electrochemical and thermal properties

José Emilio de la Cerda-Pedro,<sup>a</sup> Oscar Javier Hernández-Ortiz,<sup>b</sup> Rosa Angeles Vázquez-García,<sup>b</sup> Heraclio López-Ruiz,<sup>c</sup> Ramón Gómez-Aguilar,<sup>d</sup> Norberto Farfán<sup>e</sup> and Itzia I. Padilla-Martínez<sup>a\*</sup>

<sup>a</sup> Laboratorio de Química Supramolecular y Nanociencias de la Unidad Profesional Interdisciplinaria de Biotecnología del Instituto Politécnico Nacional, Av. Acueducto s/n Barrio la laguna Ticomán, 07340, Ciudad de México, México. E-mail: [ipadillamar@ipn.mx](mailto:ipadillamar@ipn.mx)

<sup>b</sup> Área Académica de Ciencias de la Tierra y Materiales, Universidad Autónoma del Estado de Hidalgo, km. 4.5 Carretera Pachuca-Tulancingo, Col. Carboneras 42184, Mineral de la Reforma, Hidalgo México.

<sup>c</sup> Área Académica de Química, Universidad Autónoma del Estado de Hidalgo, km. 4.5 Carretera Pachuca-Tulancingo, Col. Carboneras 42184, Mineral de la Reforma, Hidalgo México.

<sup>d</sup> Unidad Profesional en Ingeniería y Tecnologías Avanzadas del Instituto Politécnico Nacional, Av. I.P.N No. 2580 Col. La Laguna Ticomán, Gustavo A. Madero 07340, Ciudad de México, México.

<sup>e</sup> Facultad de Química, Departamento de Química Orgánica, Facultad de Química, Universidad Nacional Autónoma de México, Circuito Escolar, Ciudad Universitaria 04510, Ciudad de México, México. E-mail: [norberto.farfan@gmail.com](mailto:norberto.farfan@gmail.com)

| List of Tables                                                                                                                                                                                                                                                                                                                       | Page  |
|--------------------------------------------------------------------------------------------------------------------------------------------------------------------------------------------------------------------------------------------------------------------------------------------------------------------------------------|-------|
| <b>Table S1.</b> Yields compounds <b>1a-g</b> .                                                                                                                                                                                                                                                                                      | 2     |
| <b>Table S2.</b> Calculated torsion angles                                                                                                                                                                                                                                                                                           | 2     |
| <b>Table S3.1-3.14.</b> Computed electronic transitions of PhTCs <b>1a-g</b> : wavelength of excitation ( $\lambda_{\text{DFT}}$ ) in nm, energy (E) in eV, oscillation strength (f) and MO configuration (% probability), in bold the most probable transition in both the gas phase and CH <sub>2</sub> Cl <sub>2</sub> solutions. | 3-28  |
| <b>Table S4.</b> Resistivity values of FPhTCs <b>1a-g</b> .                                                                                                                                                                                                                                                                          | 28    |
| <br>                                                                                                                                                                                                                                                                                                                                 |       |
| List of Figures                                                                                                                                                                                                                                                                                                                      | Page  |
| <b>Figures S1-14.</b> <sup>1</sup> H and <sup>13</sup> C NMR spectra of compounds <b>1a-g</b>                                                                                                                                                                                                                                        | 29-42 |
| <b>Figures S15-21.</b> HRMS mass spectrum of compounds <b>1a-g</b>                                                                                                                                                                                                                                                                   | 43-49 |
| <b>Figure S22.</b> Isosurfaces of the HOMO, LUMO, HOMO-1 and LUMO+1 orbitals of <b>1a-g</b> .                                                                                                                                                                                                                                        | 50    |
| <b>Figures S23.</b> Individual cyclic voltammograms of compounds <b>1a-g</b> .                                                                                                                                                                                                                                                       | 51-52 |
| <b>Figures S25.</b> Thermal characterization of compounds <b>1a-g</b> .                                                                                                                                                                                                                                                              | 52-55 |

**Table S1.** Yields compounds **1a-g**

| Substituent        | Compound  | Yield (%) |
|--------------------|-----------|-----------|
| H                  | <b>1a</b> | 87        |
| 6-OCH <sub>3</sub> | <b>1b</b> | 97        |
| 7-NEt <sub>2</sub> | <b>1c</b> | 75        |
| 6-Br               | <b>1d</b> | 93        |
| 6-Cl               | <b>1e</b> | 87        |
| 8-OEt              | <b>1f</b> | 84        |
| 7-OH               | <b>1g</b> | 77        |

**Table S2.** Calculated torsion angles **1a-g**

|    | Ángulo de torsión C2-C3-N-C9 | Ángulo de torsión N-C10-C11-C12 |
|----|------------------------------|---------------------------------|
| 1a | 0.014                        | 0.017                           |
| 1b | 0.025                        | 0.0059                          |
| 1c | 0.25                         | 0.17                            |
| 1d | 0.024                        | 0.0049                          |
| 1e | 0.012                        | 0.039                           |
| 1f | 0.0032                       | 0.026                           |
| 1g | 0.031                        | 0.04                            |

**Tables S3.** Table S3. Computed electronic transitions of PhTCs 1a-g: wavelength of excitation ( $\lambda_{\text{DFT}}$ ) in nm, energy (E) in eV, oscillation strength (f) and MO configuration (% probability), in bold the most probable transition in both the gas phase and  $\text{CH}_2\text{Cl}_2$  solutions.

**Table S3.1.** First thirty electronic transitions of **1a**, obtained by BhandHLYP/6-31G (d, p), oscillator strength and probable character of molecular orbital.

| <i>Molecule</i> | $\lambda_{\text{ab}}$<br>(nm) | E(tr)<br>(eV) | OS(f)         | <i>MO/Character</i>                                                                                                                                     |
|-----------------|-------------------------------|---------------|---------------|---------------------------------------------------------------------------------------------------------------------------------------------------------|
| <b>1a</b>       | 318.16                        | 3.8969        | <b>0.7810</b> | H-1→L (11%), <b>H→L (84%)</b>                                                                                                                           |
|                 | 312.67                        | 3.9653        | 0.0002        | H-4→L (3%), H-4→L+1 (75%), H-4→L+6 (17%)                                                                                                                |
|                 | 272.04                        | 4.5576        | 0.0177        | H-3→L (21%), H-1→L (61%), H→L (7%)                                                                                                                      |
|                 | 262.07                        | 4.7310        | <b>0.6731</b> | H-1→L+1 (6%), H→L (2%), <b>H→L+1 (83%)</b>                                                                                                              |
|                 | 257.46                        | 4.8156        | 0.0416        | H-3→L (62%), H-1→L (19%), H-1→L+2 (5%), H→L+1 (4%), H→L+2 (2%)                                                                                          |
|                 | 248.66                        | 4.9862        | 0.0180        | H-2→L (10%), H-2→L+1 (63%), H-1→L+5 (2%), H→L+3 (3%), H→L+4 (6%), H→L+5 (9%).                                                                           |
|                 | 235.67                        | 5.2609        | 0.0007        | H-8→L (60%), H-8→L+1 (2%), H-8→L+2 (6%), H-8→L+3 (12%), H-6→L (7%)                                                                                      |
|                 | 229.41                        | 5.4045        | 0.0046        | H-8→L (8%), H-6→L (46%), H-6→L+1 (3%), H-6→L+2 (6%), H-6→L+3 (5%), H-6→L+4 (8%), H-6→L+5 (7%), H-5→L (3%), H-2→L (3%)                                   |
|                 | 219.27                        | 5.6545        | 0.0096        | H-6→L (2%), H-2→L (83%), H-2→L+1 (7%)                                                                                                                   |
|                 | 215.76                        | 5.7463        | 0.0475        | H-7→L (2%), H-3→L (2%), H-2→L+1 (3%), H-1→L+1 (8%), H-1→L+2 (2%), H→L+2 (38%), H→L+3 (18%), H→L+4 (7%), H→L+5 (7%)                                      |
|                 | 207.51                        | 5.9748        | 0.0271        | H-3→L (8%), H-3→L+2 (4%), H-3→L+4 (7%), H-1→L+2 (15%), H-1→L+3 (14%), H-1→L+4 (2%), H→L+2 (10%), H→L+3 (27%)                                            |
|                 | 206.18                        | 6.0134        | 0.0158        | H-7→L (5%), H-5→L (24%), H-5→L+1 (5%), H-1→L+1 (41%), H→L+1 (5%), H→L+2 (3%),                                                                           |
|                 | 202.02                        | 6.1371        | 0.0564        | H-7→L (9%), H-5→L (14%), H-1→L+1 (8%), H-1→L+2 (10%), H-1→L+3 (6%), H-1→L+4 (3%), H→L+4 (34%)                                                           |
|                 | 199.27                        | 6.2218        | <b>0.1130</b> | H-7→L (11%), <b>H-5→L (16%), H-3→L+2 (16%),</b> H-3→L+3 (2%), H-1→L+1 (12%), H-1→L+2 (3%), H-1→L+4 (8%), H→L+2 (6%), H→L+3 (8%), H→L+4 (5%), H→L+5 (3%) |
|                 | 195.90                        | 6.3290        | <b>0.1108</b> | <b>H-7→L (32%),</b> H-5→L (25%), H-3→L+2 (7%), H-2→L+1 (5%), H-1→L+1 (8%), H-1→L+3 (4%), H→L+4 (4%), H→L+5 (3%)                                         |
|                 | 192.78                        | 6.4315        | <b>0.1391</b> | H-7→L (12%), H-4→L (2%), H-2→L+1 (15%), H-1→L+4 (3%), H→L+4 (4%), <b>H→L+5 (50%)</b>                                                                    |
|                 | 192.16                        | 6.4520        | 0.0046        | H-4→L (98%)                                                                                                                                             |
|                 | 190.37                        | 6.5126        | 0.0016        | H-6→L (14%), H-6→L+1 (18%), H-6→L+6 (5%), H-5→L+1 (26%), H-4→L (4%), H-1→L+2 (5%), H-1→L+3 (4%), H→L+2 (2%), H→L+6 (2%)                                 |

|        |        |        |                                                                                                                                                                                                    |
|--------|--------|--------|----------------------------------------------------------------------------------------------------------------------------------------------------------------------------------------------------|
| 188.10 | 6.5914 | 0.0612 | H-6→L (7%), H-6→L+1 (20%), H-6→L+6 (4%), H-5→L+1 (8%), H-1→L+2 (14%), H-1→L+3 (5%), H-1→L+5 (4%), H→L+2 (5%), H→L+4 (4%), H→L+6 (4%)                                                               |
| 184.85 | 6.7071 | 0.3838 | H-7→L (6%), H-5→L+1 (20%), H-3→L+2 (6%), H-2→L+4 (3%), H-2→L+5 (6%), H-1→L+1 (3%), H-1→L+2 (10%), H-1→L+3 (12%), H-1→L+4 (7%), H-1→L+5 (5%), H→L+2 (2%), H→L+3 (4%)                                |
| 181.51 | 6.8308 | 0.2159 | H-9→L (4%), H-7→L (8%), H-5→L+1 (7%), H-3→L+2 (21%), H-3→L+3 (6%), H-1→L+2 (7%), H-1→L+3 (3%), H-1→L+5 (2%), H→L+2 (6%), H→L+4 (12%), H→L+5 (9%)                                                   |
| 181.09 | 6.8464 | 0.0749 | H-5→L+1 (3%), H-3→L+1 (4%), H-3→L+2 (4%), H-3→L+3 (14%), H-3→L+4 (17%), H-1→L+3 (6%), H→L+2 (15%), H→L+3 (21%), H→L+4 (3%)                                                                         |
| 177.76 | 6.9748 | 0.2642 | H-5→L+1 (4%), H-3→L+1 (7%), H-2→L+2 (3%), H-2→L+3 (9%), H-2→L+4 (14%), H-2→L+5 (13%), H-1→L+2 (2%), H-1→L+6 (4%), H→L+6 (28%)                                                                      |
| 176.92 | 7.0081 | 0.0034 | H-13→L (11%), H-12→L (4%), H-10→L (3%), H-10→L+1 (3%), H-8→L (5%), H-8→L+2 (6%), H-8→L+3 (3%). H-6→L (2%), H-6→L+1 (22%), H-6→L+2 (4%), H-6→L+3 (7%), H-6→L+4 (3%), H-6→L+5 (4%), H-3→L+1 (3%)     |
| 176.20 | 7.0364 | 0.0245 | H-3→L+1 (73%), H→L+3 (3%)                                                                                                                                                                          |
| 174.57 | 7.1023 | 0.0020 | H-15→L (2%), H-12→L (14%), H-12→L+2 (3%), H-12→L+3 (3%), H-12→L+4 (4%), H-12→L+5 (4%), H-11→L (9%), H-11→L+4 (2%), H-10→L (4%), H-6→L (7%), H-6→L+1 (2%), H-6→L+2 (3%), H-6→L+3 (4%), H-6→L+4 (3%) |
| 172.94 | 7.1690 | 0.1945 | H-5→L+1 (15%), H-2→L+3 (5%), H-2→L+4 (9%), H-2→L+5 (10%). H→L+6 (42%)                                                                                                                              |
| 171.71 | 7.2204 | 0.1002 | H-11→L (3%), H-9→L (27%) H-3→L+1 (3%), H-3→L+3 (19%), H-3→L+4 (5%), H-3→L+4 (5%), H-1→L+2 (10%), H-1→L+4 (12%), H-1→L+5 (3%), H→L+2 (2%)                                                           |
| 170.19 | 7.2850 | 0.0038 | H-13→L (21%), H-12→L (3%), H-10→L+1 (2%), H-8→L (12%), H-8→L+2 (14%), H-8→L+3 (6%), H-8→L+4 (2%). H-8→L+8 (2%), H-6→L (3%), H-6→L+1 (5%), H-6→L+2 (3%), H-6→L+3 (3%)                               |
| 169.24 | 7.3259 | 0.1286 | H-9→L (5%), H-3→L+2 (5%) H-3→L+3 (9%), H-3→L+4 (7%), H-1→L+2 (4%), H-1→L+3 (19%), H-1→L+4 (9%), H→L+3 (9%), H→L+4 (6%)                                                                             |

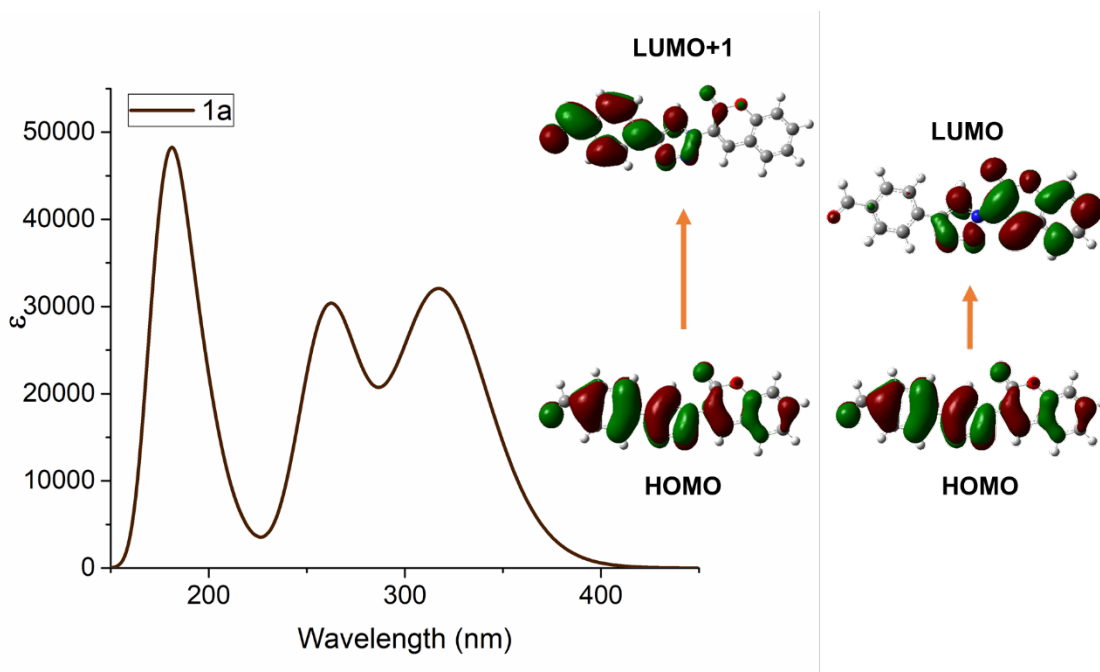

Molecular orbitals of the main electronic transitions calculated by TDDFT BandHLYP/6-31G (d, p).

**Table S3.2.** First thirty electronic transitions of **1b**, obtained by BhandHLYP/6-31G (d, p), oscillator strength and probable character of molecular orbital.

| <i>Molecule</i> | $\lambda_{ab}$<br>(nm) | E(tr)<br>(eV) | OS(f)         | <i>MO/Character</i>                                                                                                                |
|-----------------|------------------------|---------------|---------------|------------------------------------------------------------------------------------------------------------------------------------|
| <b>1b</b>       | 319.21                 | 3.8841        | <b>0.7302</b> | H-1→L (16%), <b>H→L (78%)</b>                                                                                                      |
|                 | 306.16                 | 4.0496        | 0.0001        | H-4→L (3%), H-4→L+1 (74%), H-4→L+6 (18%)                                                                                           |
|                 | 292.8                  | 4.2345        | 0.0737        | H-3→L (2%), H-2→L (6%), H-1→L (72%), H→L (12%)                                                                                     |
|                 | 261.48                 | 4.7417        | <b>0.7004</b> | H-2→L+1 (2%), H-1→L+1 (7%), H→L (2%), <b>H→L+1 (80%)</b>                                                                           |
|                 | 257.19                 | 4.8207        | 0.0899        | H-5→L (2%), H-3→L (23%), H-2→L (56%), H-1→L (5%), H-1→L+2 (3%), H→L (3%), H→L+1 (3%)                                               |
|                 | 247.56                 | 5.0083        | 0.0172        | H-3→L (6%), H-3→L+1 (40%), H-2→L (4%), H-2→L+1 (23%), H→L+2 (2%), H→L+3 (2%), H→L+4 (10%), H→L+5 (4%),                             |
|                 | 232.18                 | 5.3401        | 0.0021        | H-8→L (46%), H-8→L+2 (3%), H-8→L+3 (10%), H-6→L (24%), H-6→L+2 (4%), H-6→L+5 (3%)                                                  |
|                 | 227.85                 | 5.4415        | 0.0031        | H-8→L (23%), H-8→L+3 (6%), H-6→L (38%), H-6→L+1 (3%), H-6→L+2 (9%), H-6→L+5 (8%)                                                   |
|                 | 217.95                 | 5.6885        | 0.0251        | H-3→L (60%), H-3→L+1 (4%), H-2→L (27%), H-2→L+1 (3%)                                                                               |
|                 | 213.26                 | 5.8139        | 0.0337        | H-3→L+1 (6%), H-2→L+2 (4%), H-1→L (3%), H-1→L+1 (5%), H-1→L+2 (4%), H-1→L+3 (15%), H→L+2 (44%), H→L+5 (3%)                         |
|                 | 210.83                 | 5.8807        | 0.0345        | H-7→L (5%), H-3→L+1 (5%), H-1→L+1 (7%), H-1→L+2 (12%), H-1→L+3 (19%), H→L+3 (28%), H→L+5 (7%)                                      |
|                 | 206.81                 | 5.9950        | 0.1512        | H-7→L (6%), H-5→L (6%), H-2→L+1 (8%), H-2→L+2 (2%), H-1→L+1 (34%), H-1→L+2 (10%), H-1→L+4 (3%), H→L+1 (6%), H→L+2 (5%), H→L+4 (8%) |

|        |        |               |                                                                                                                                                                                     |
|--------|--------|---------------|-------------------------------------------------------------------------------------------------------------------------------------------------------------------------------------|
| 203.15 | 6.1031 | <b>0.2440</b> | H-5→L (6%), H-3→L+3 (2%), H-2→L+1 (6%), H-2→L+2 (5%), H-2→L+2 (3%), H-1→L+1 (4%), H-1→L+2 (19%), H-1→L+4 (14%), H-1→L+5 (3%), H→L+2 (6%), H→L+3 (15%),                              |
| 199.44 | 6.2165 | 0.0722        | H-7→L (19%), H-5→L (45%), H-1→L+1 (9%), H→L+4 (6%)                                                                                                                                  |
| 195.24 | 6.3502 | <b>0.1685</b> | H-7→L (13%), H-5→L (13%), H-2→L+1 (11%), H-2→L+3 (4%), H-1→L+1 (16%), H→L+4 (26%), H→L+5 (2%)                                                                                       |
| 191.11 | 6.4874 | 0.0309        | H-7→L (28%), H-5→L (15%), H-2→L+1 (19%), H-1→L+1 (6%), H→L+4 (3%), H→L+5 (16%)                                                                                                      |
| 190.71 | 6.5012 | 0.0005        | H-6→L+1 (10%), H-4→L (80%)                                                                                                                                                          |
| 190.09 | 6.5224 | 0.1620        | H-7→L (3%), H-5→L+1 (12%), H-3→L+1 (22%), H-3→L+2 (3%), H-3→L+4 (4%), H-2→L+1 (7%), H-2→L+3 (2%), H-1→L+1 (5%), H-1→L+3 (8%), H→L+2 (3%), H→L+3 (3%), H→L+4 (5%), H→L+5 (13%),      |
| 189.3  | 6.5495 | 0.0021        | H-6→L (17%), H-6→L+1 (44%), H-6→L+6 (9%), H-4→L (15%),                                                                                                                              |
| 185.61 | 6.6799 | 0.0996        | H-5→L+1 (13%), H-3→L+1 (10%), H-3→L+2 (2%), H-2→L+1 (11%), H-2→L+2 (3%), H-2→L+5 (3%), H-1→L+1 (3%), H-1→L+2 (9%), H-1→L+3 (10%), H-1→L+4 (2%), H→L+3 (10%), H→L+4 (7%), H→L+6 (6%) |
| 185.07 | 6.6995 | 0.1143        | H-7→L (5%), H-5→L+1 (19%), H-3→L+3 (4%), H-3→L+4 (3%), H-2→L+2 (12%), H-2→L+3 (3%), H-1→L+3 (17%), H→L+2 (10%), H→L+5 (9%)                                                          |
| 183.23 | 6.7664 | <b>0.4857</b> | H-7→L (12%), H-3→L+2 (3%), H-3→L+3 (3%), H-2→L+2 (12%), H-2→L+3 (11%), H-1→L+4 (10%), H-1→L+5 (11%), H→L+2 (7%), <b>H→L+3 (17%)</b>                                                 |
| 181.13 | 6.8452 | 0.0010        | H-5→L+1 (18%), H-3→L+1 (4%), H-3→L+2 (2%), H-3→L+5 (4%), H-2→L+3 (2%), H-2→L+4 (10%), H-1→L+2 (15%), H→L+4 (12%), H→L+5 (19%)                                                       |
| 177.20 | 6.9969 | 0.2413        | H-9→L (18%), H-5→L+1 (3%), H-3→L+2 (5%), H-3→L+4 (11%), H-2→L+3 (4%), H-2→L+4 (2%), H-1→L+2 (8%), H-1→L+5 (2%), H-1→L+6 (3%), H→L+4 (2%), H→L+6 (21%),                              |
| 176.07 | 7.0417 | 0.0002        | H-16→L (7%), H-13→L (12%), H-13→L+2 (3%), H-12→L (7%), H-10→L (8%), H-8→L (7%), H-8→L+2 (6%), H-8→L+3 (5%), H-6→L+1 (12%), H-6→L+2 (4%), H-6→L+3 (2%), H-6→L+5 (4%)                 |
| 175.95 | 7.0467 | 0.0094        | H-9→L (63%), H-3→L+2 (3%), H-3→L+3 (2%), H-3→L+4 (3%), H-2→L+4 (4%), H→L+6 (9%)                                                                                                     |
| 173.29 | 7.1546 | 0.0020        | H-15→L (7%), H-13→L (21%), H-13→L+2 (6%), H-10→L (3%), H-10→L+2 (2%), H-10→L+5 (2%), H-6→L (9%), H-6→L+1 (4%), H-6→L+2 (10%), H-6→L+3 (4%), H-6→L+5 (8%)                            |
| 172.15 | 7.2023 | 0.1634        | H-5→L+1 (23%), H-3→L+2 (5%), H-3→L+3 (8%), H-3→L+4 (7%), H-2→L+4 (7%), H-2→L+5 (3%), H-1→L+2 (3%), H-1→L+6 (2%), H→L+6 (31%)                                                        |
| 170.28 | 7.2814 | 0.1162        | H-9→L (2%), H-3→L+3 (11%), H-2→L+3 (32%), H-1→L+2 (7%), H-1→L+4 (3%), H→L+3 (14%), H→L+6 (11%),                                                                                     |

|  |        |        |        |                                                                                                                                                                                  |
|--|--------|--------|--------|----------------------------------------------------------------------------------------------------------------------------------------------------------------------------------|
|  | 168.84 | 7.3434 | 0.0004 | H-15→L (9%), H-13→L (5%), H-12→L (10%), H-10→L+1 (3%), H-8→L (10%), H-8→L+2 (7%), H-8→L+3 (7%), H-8→L+4 (3%), H-6→L (5%), H-6→L+1 (5%), H-6→L+2 (8%), H-6→L+3 (4%), H-6→L+5 (4%) |
|--|--------|--------|--------|----------------------------------------------------------------------------------------------------------------------------------------------------------------------------------|

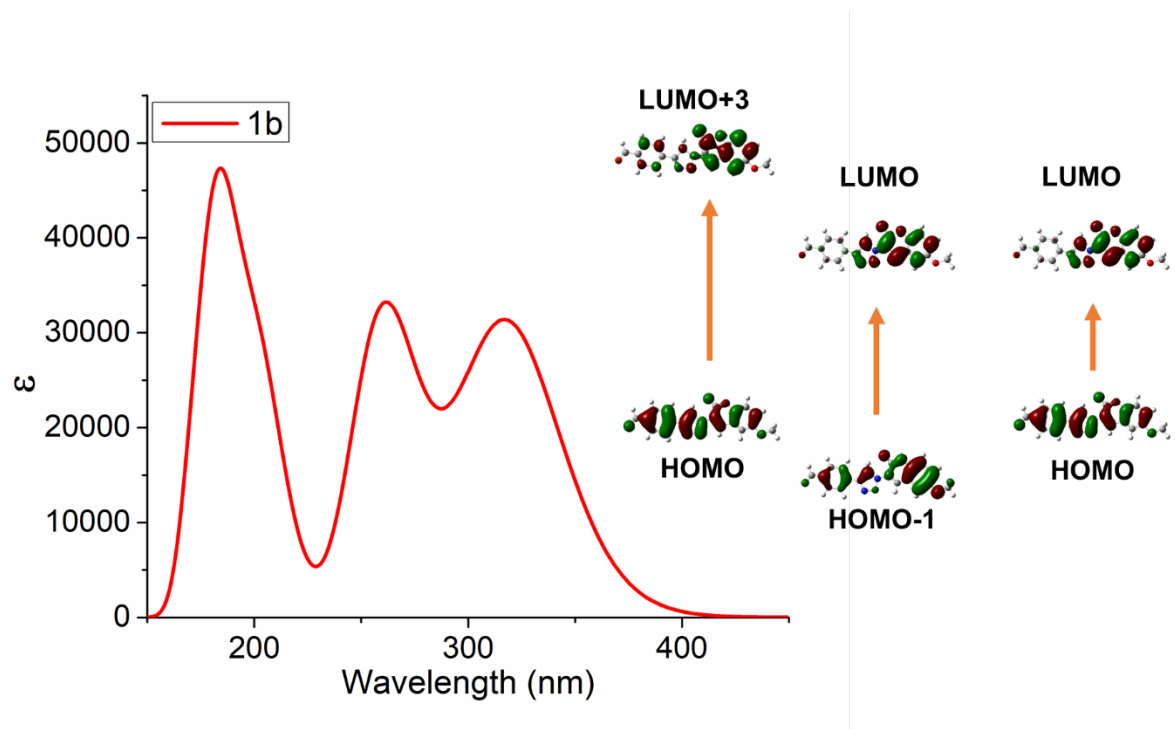

Molecular orbitals of the main electronic transitions calculated by TDDFT BandHLYP/6-31G (d, p).

**Table S3.3.** First thirty electronic transitions of **1c**, obtained by BhandHLYP/6-31G (d, p), oscillator strength and probable character of molecular orbital.

| <i>Molecule</i> | $\lambda_{ab}$<br>(nm) | E(tr)<br>(eV) | OS(f)         | MO/Character                                                                             |
|-----------------|------------------------|---------------|---------------|------------------------------------------------------------------------------------------|
| <b>1c</b>       | 343.16                 | 3.6130        | <b>1.2071</b> | <b>H→L (94%)</b>                                                                         |
|                 | 311.42                 | 3.9813        | 0.0001        | H-5→L+1 (6%), H-4→L (3%), H-4→L+1 (70%), H-4→L+6 (16%)                                   |
|                 | 272.59                 | 4.5484        | <b>0.1547</b> | <b>H-1→L (56%)</b> , H-1→L+1 (11%), H→L+1 (24%), H→L+2 (2%)                              |
|                 | 266.06                 | 4.6600        | 0.3924        | H-1→L (34%), H-1→L+1 (28%), H→L+2 (31%)                                                  |
|                 | 262.21                 | 4.7284        | 0.0116        | H-5→L (3%), H-3→L (49%), H-1→L+2 (3%), H→L+2 (31%), H→L+3 (3%)                           |
|                 | 248.22                 | 4.9950        | 0.0158        | H-2→L (8%), H-2→L+1 (64%), H-1→L+3 (9%), H-1→L+4 (6%), H→L+3 (4%), H→L+4 (2%)            |
|                 | 234.05                 | 5.2973        | 0.0521        | H-3→L (38%), H-1→L+1 (9%), H→L+1 (7%), H→L+2 (35%)                                       |
|                 | 231.66                 | 5.3519        | 0.0300        | H-5→L+1 (3%), H-3→L (7%), H-1→L+1 (35%), H→L+1 (29%), H→L+2 (5%), H→L+3 (6%), H→L+4 (3%) |
|                 | 230.99                 | 5.3676        | 0.0007        | H-8→L (61%), H-8→L+1 (3%), H-8→L+2 (2%), H-8→L+3 (5%), H-8→L+4 (11%), H-7→L (3%)         |

|        |        |               |                                                                                                                                                                    |
|--------|--------|---------------|--------------------------------------------------------------------------------------------------------------------------------------------------------------------|
| 223.54 | 5.5463 | 0.0064        | H-8→L (3%), H-7→L (44%), H-7→L+1 (6%), H-7→L+2 (7%), H-7→L+3 (9%), H-7→L+4 (3%), H-7→L+5 (13%), H-7→L+6 (2%), H-6→L (3%)                                           |
| 219.19 | 5.6564 | <b>0.1094</b> | H-5→L (8%), H-1→L+1 (3%), H-1→L+2 (3%), H→L+1 (3%), H→L+2 (4%), <b>H→L+3 (39%)</b> , H→L+4 (23%)                                                                   |
| 213.56 | 5.8057 | 0.0891        | H-6→L (4%), H-5→L (66%), H-4→L (6%), H-2→L (3%), H→L+2 (9%), H→L+3 (3%)                                                                                            |
| 210.27 | 5.8965 | 0.0549        | H-3→L+2 (4%), H-2→L (15%), H-1→L+2 (3%), H-1→L+3 (5%), H→L+3 (3%), H→L+4 (18%), H→L+5 (41%)                                                                        |
| 208.62 | 5.9430 | 0.0053        | H-5→L (3%), H-2→L (70%), H-2→L+1 (6%), H→L+5 (12%)                                                                                                                 |
| 199.58 | 6.2124 | 0.0770        | H-6→L (2%), H-6→L+1 (8%), H-2→L+1 (17%), H-1→L+2 (3%), H-1→L+3 (25%), H-1→L+4 (3%), H→L+4 (9%), H→L+5 (16%)                                                        |
| 195.53 | 6.3410 | 0.0294        | H-9→L (3%), H-7→L+1 (3%), H-6→L (55%), H-6→L+1 (11%), H-5→L (2%), H-5→L (2%), H-1→L+3 (4%), H→L+4 (3%)                                                             |
| 193.95 | 6.3926 | 0.1099        | H-2→L+1 (4%), H-1→L+2 (31%), H-1→L+3 (4%), H-1→L+4 (16%), H-1→L+5 (11%), H→L+3 (16%), H→L+4 (5%)                                                                   |
| 190.37 | 6.5128 | 0.0689        | H-9→L (4%), H-7→L (25%), H-7→L+1 (25%), H-7→L+6 (6%), H-6→L (10%), H-6→L+1 (15%)                                                                                   |
| 187.74 | 6.6041 | 0.4660        | H-9→L (3%), H-7→L (4%), H-7→L+1 (21%), H-7→L+6 (3%), H-6→L (4%), H-6→L+1 (21%), H-5→L+1 (3%), H-3→L+2 (11%), H-2→L+3 (5%), H-2→L+4 (3%), H→L+4 (3%)                |
| 184.88 | 6.7062 | 0.3712        | H-9→L (2%), H-6→L (3%), H-6→L+1 (6%), H-3→L+1 (7%), H-3→L+2 (44%), H-1→L+2 (6%), H-1→L+3 (7%), H-1→L+5 (3%), H-2→L+2 (3%), H-2→L+5 (3%)                            |
| 183.22 | 6.7669 | 0.0332        | H-9→L (2%), H-5→L (5%), H-5→L+2 (4%), H-4→L (63%), H-1→L+2 (6%), H-1→L+3 (4%)                                                                                      |
| 183.14 | 6.7697 | 0.1433        | H-9→L (4%), H-5→L+2 (12%), H-4→L (23%), H-3→L+1 (2%), H-3→L+2 (5%), H-1→L+2 (17%), H-1→L+3 (10%), H-1→L+4 (4%), H-1→L+5 (2%), H→L+2 (2%), H→L+5 (3%)               |
| 179.86 | 6.8934 | 0.0003        | H-9→L (27%), H-3→L+1 (12%), H-2→L+3 (5%), H-1→L+1 (2%), H-1→L+5 (4%), H-1→L+6 (17%), H→L+6 (12%)                                                                   |
| 179.32 | 6.9141 | 0.0083        | H-6→L+1 (5%), H-5→L+1 (5%), H-3→L+1 (47%), H-3→L+2 (2%), H-3→L+3 (2%), H-2→L+3 (4%), H-1→L+6 (7%), H→L+6 (11%)                                                     |
| 177.22 | 6.9961 | 0.3311        | H-9→L (30%), H-7→L+1 (2%), H-3→L+1 (10%), H-3→L+2 (6%), H-2→L+3 (13%), H-2→L+4 (5%), H-1→L+6 (5%), H→L+5 (4%), H→L+6 (3%)                                          |
| 176.87 | 7.0099 | 0.0020        | H-5→L+1 (21%), H-3→L+1 (11%), H-1→L+3 (7%), H-1→L+4 (8%), H-1→L+5 (3%), H→L+3 (8%), H→L+4 (13%), H→L+5 (4%), H→L+6 (2%)                                            |
| 175.69 | 7.0570 | 0.1114        | H-7→L+1 (6%), H-6→L+1 (8%), H-5→L+1 (15%), H-5→L+2 (3%), H-3→L+1 (2%), H-2→L+3 (4%), H-1→L+3 (4%), H-1→L+4 (14%), H-1→L+5 (3%), H→L+3 (7%), H→L+4 (5%), H→L+5 (3%) |
| 175.08 | 7.0815 | 0.0901        | H-17→L (3%), H-13→L (3%) H-12→L (4%), H-11→L (4%), H-8→L (4%), H-8→L+2 (5%), H-8→L+4 (2%), H-7→L (4%), H-                                                          |



|        |        |        |  |                                                                                                                                                                      |
|--------|--------|--------|--|----------------------------------------------------------------------------------------------------------------------------------------------------------------------|
|        |        |        |  | 7→L+1 (7%), H-7→L+2 (4%), H-7→L+3 (8%), H-7→L+4 (2%), H-7→L+5 (3%), H-6→L+1 (6%), H-2→L+3 (8%), H-2→L+4 (5%), H-2→L+6 (2%)                                           |
| 174.37 | 7.1105 | 0.0590 |  | H-9→L (3%), H-7→L+1 (3%), H-5→L+1 (9%), H-5→L+2 (4%), H-3→L+3 (3%), H-3→L+4 (14%), H-3→L+5 (12%), H-2→L+3 (9%), H-2→L+4 (4%), H-1→L+4 (9%), H-1→L+5 (3%), H→L+6 (4%) |
| 172.75 | 7.1771 | 0.1098 |  | H-9→L (4%), H-5→L+1 (15%), H-5→L+2 (3%), H-3→L+1 (2%), H-3→L+3 (5%), H-3→L+4 (19%), H-3→L+5 (14%), H-2→L+3 (4%), H-1→L+6 (6%), H→L+6 (7%)                            |

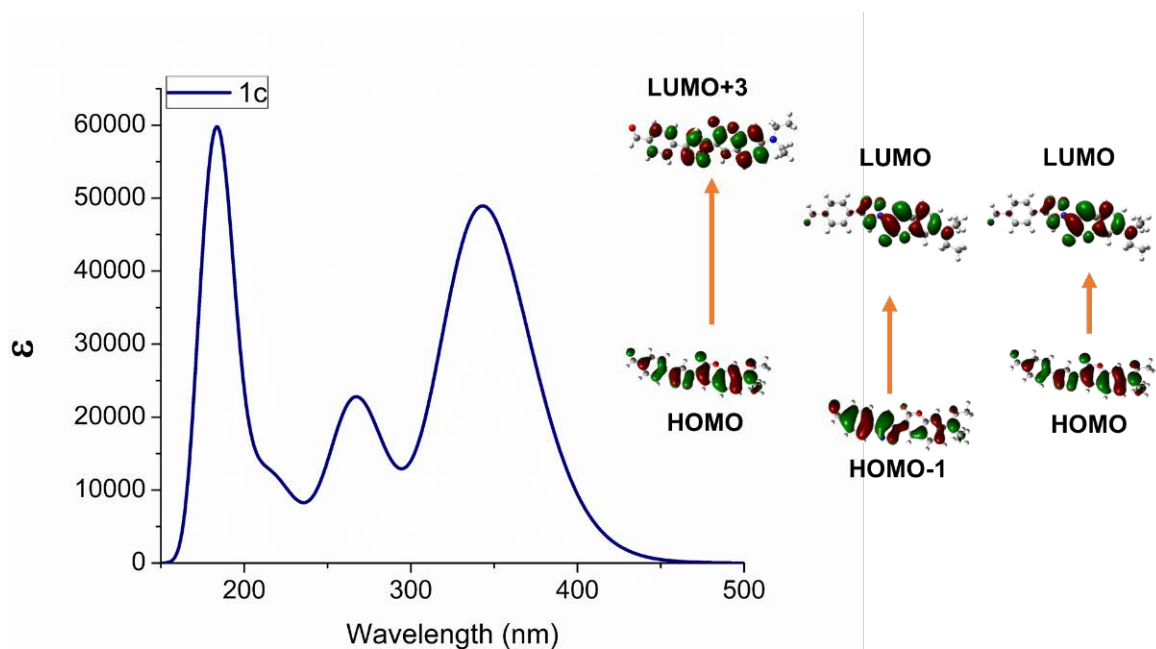

Molecular orbitals of the main electronic transitions calculated by TDDFT BhandHLYP/6-31G (d, p).

**Table S3.4.** First thirty electronic transitions of **1d**, obtained by BhandHLYP/6-31G (d, p), oscillator strength and probable character of molecular orbital.

| <i>Molecule</i> | $\lambda_{ab}$<br>(nm) | E(tr)<br>(eV) | OS(f)         | MO/Character                                                                                     |
|-----------------|------------------------|---------------|---------------|--------------------------------------------------------------------------------------------------|
| <b>1d</b>       | 325.84                 | 3.8051        | <b>0.7358</b> | H-1→L (10%), <b>H→L (84%)</b>                                                                    |
|                 | 313.15                 | 3.9593        | 0.0001        | H-4→L (2%), H-4→L+1 (75%), H-4→L+7 (17%)                                                         |
|                 | 283.13                 | 4.3791        | 0.0134        | H-3→L (10%), H-1→L (73%), H→L (7%)                                                               |
|                 | 262.94                 | 4.7154        | <b>0.8143</b> | H-3→L (18%), H-1→L (2%), H-1→L+1 (3%), H→L (3%), <b>H→L+1 (65%)</b>                              |
|                 | 259.08                 | 4.7856        | <b>0.1049</b> | <b>H-3→L (54%)</b> , H-1→L (7%), H-1→L+2 (4%), H→L+1 (23%), H→L+2 (2%)                           |
|                 | 249.15                 | 4.9764        | 0.0187        | H-2→L (13%), H-2→L+1 (61%), H→L+4 (6%), H→L+6 (11%)                                              |
|                 | 237.24                 | 5.2261        | 0.0013        | H-10→L (45%), H-10→L+2 (3%), H-10→L+3 (10%), H-9→L (9%), H-9→L+3 (2%), H-6→L (15%), H-6→L+4 (3%) |

|        |        |               |                                                                                                                                                                      |
|--------|--------|---------------|----------------------------------------------------------------------------------------------------------------------------------------------------------------------|
| 232.97 | 5.3220 | 0.0030        | H-10→L (12%), H-10→L+3 (3%), H-9→L (2%), H-6→L (39%), H-6→L+2 (3%), H-6→L+4 (14%), H-6→L+6 (4%), H-5→L (6%), H-2→L (4%)                                              |
| 225.45 | 5.4994 | 0.0104        | H-6→L (3%), H-2→L (79%), H-2→L+1 (9%)                                                                                                                                |
| 217.09 | 5.7111 | 0.0867        | H-3→L (4%), H-3→L+1 (2%), H-3→L+2 (4%), H-1→L+1 (3%), H-1→L+2 (5%), H→L+2 (44%), H→L+4 (20%), H→L+6 (3%)                                                             |
| 212.46 | 5.8355 | 0.0896        | H-8→L (5%), H-3→L (6%), H-1→L+2 (20%), H-1→L+3 (12%), H→L+2 (4%), H→L+3 (12%), H→L+4 (24%), H→L+6 (2%)                                                               |
| 209.90 | 5.9068 | 0.0008        | H-8→L+5 (5%), H-3→L+5 (26%), H-1→L+5 (55%), H→L+5 (6%)                                                                                                               |
| 207.57 | 5.9732 | <b>0.2064</b> | H-8→L (3%), H-3→L+2 (18%), H-1→L+1 (5%), H-1→L+2 (15%), H-1→L+3 (19%), H-1→L+4 (2%), <b>H→L+3 (22%)</b> , H→L+4 (5%)                                                 |
| 207.09 | 5.9870 | 0.0108        | H-5→L (4%), H-2→L (4%), H-6→L (3%), H-5→L (51%), H-5→L+1 (3%), H-3→L+1 (3%), H-1→L+1 (12%), H→L+1 (2%), H→L+2 (3%)                                                   |
| 201.41 | 6.1559 | 0.1466        | H-10→L (3%), H-9→L (21%), H-5→L (3%), H-5→L+1 (3%), H-3→L+1 (5%), H-3→L+2 (8%), H-2→L+1 (4%), H-1→L+1 (23%), H-1→L+4 (2%), H→L+4 (17%), H→L+6 (2%),                  |
| 198.92 | 6.2330 | 0.0209        | H-8→L (26%), H-6→L (2%), H-5→L (24%), H-3→L+1 (3%), H-1→L+1 (18%), H-1→L+3 (2%), H→L+2 (4%), H→L+3 (5%), H→L+4 (4%)                                                  |
| 197.18 | 6.2787 | 0.0006        | H-4→L (96%)                                                                                                                                                          |
| 194.18 | 6.3850 | 0.0003        | H-7→L (94%), H-7→L+3 (3%)                                                                                                                                            |
| 193.3  | 6.4142 | 0.2142        | H-9→L (18%), H-3→L+2 (2%), H-2→L+1 (13%), H-1→L+1 (4%), H-1→L+2 (7%), H→L+2 (6%), H→L+4 (5%), H→L+6 (32%)                                                            |
| 191.37 | 6.4788 | 0.1703        | H-8→L (2%), H-6→L (3%), H-6→L+1 (3%), H-5→L+1 (19%), H-3→L+4 (3%), H-1→L+1 (3%), H-1→L+2 (14%), H-1→L+4 (3%), H→L+2 (8%), H→L+3 (5%), H→L+6 (16%), H→L+7 (3%)        |
| 189.94 | 6.5275 | 0.0732        | H-10→L (4%), H-9→L (15%), H-8→L (12%), H-6→L (3%), H-6→L+1 (3%), H-5→L+1 (4%), H-3→L+2 (14%), H-3→L+3 (2%), H-2→L+1 (2%), H-1→L+3 (9%), H-1→L+6 (3%), H→L+6 (13%)    |
| 188.75 | 6.5687 | 0.0214        | H-13→L (2%), H-10→L (2%), H-9→L (6%), H-6→L (12%), H-6→L+1 (31%), H-6→L+4 (6%), H-6→L+7 (8%), H-1→L+2 (4%), H→L+3 (2%)                                               |
| 187.11 | 6.6264 | 0.3398        | H-8→L (3%), H-3→L+2 (10%), H-3→L+3 (19%), H-1→L+1 (3%), H-1→L+2 (3%), H-1→L+3 (4%), H-1→L+4 (5%), H→L+2 (16%), H→L+3 (22%)                                           |
| 185.37 | 6.6886 | 0.0151        | H-10→L (4%), H-9→L (26%), H-6→L+1 (3%), H-5→L+1 (24%), H-3→L+2 (3%), H-2→L+4 (2%), H-2→L+6 (3%), H-1→L+1 (7%), H-1→L+2 (2%), H→L (4%)                                |
| 182.82 | 6.7818 | 0.0446        | H-10→L (3%), H-9→L (18%), H-5→L+1 (13%), H-3→L+3 (3%), H-3→L+1 (4%), H-2→L+4 (3%), H-2→L+6 (3%), H-1→L+1 (2%), H-1→L+2 (5%), H-1→L+3 (12%), H-1→L+4 (13%) H→L+3 (4%) |

|  |        |        |        |                                                                                                                                                                                                 |
|--|--------|--------|--------|-------------------------------------------------------------------------------------------------------------------------------------------------------------------------------------------------|
|  | 180.68 | 6.8622 | 0.0003 | H-8→L+5 (2%), H-3→L+5 (42%), H-1→L+5 (5%), H→L+5 (44%)                                                                                                                                          |
|  | 179.05 | 6.9246 | 0.0162 | H-5→L+1 (6%), H-3→L+1 (64%), H-1→L+1 (10%), H→L+7 (3%)                                                                                                                                          |
|  | 178.05 | 6.9633 | 0.2801 | H-3→L+1 (9%), H-3→L+2 (4%) H-3→L+3 (2%), H-2→L+4 (19%), H-2→L+6 (18%), H-1→L+2 (2%), H-1→L+3 (2%), H-1→L+7 (2%), H→L+7 (22%)                                                                    |
|  | 177.55 | 6.9832 | 0.0106 | H-18→L (3%), H-15→L (5%), H-14→L (2%), H-13→L (8%), H-13→L+4 (2%), H-11→L (3%), H-11→L+1 (2%), H-10→L (4%), H-10→L+2 (3%), H-10→L+3 (3%), H-6→L+1 (25%), H-6→L+4 (9%), H-6→L+6 (2%), H→L+7 (3%) |
|  | 176.90 | 7.0088 | 0.0034 | H-7→L+5 (12%), L→L+6 (9%), L→L+7 (4%), L+1→L+7 (5%), L+1→L+8 (3%), L+2→L+9 (4%)                                                                                                                 |

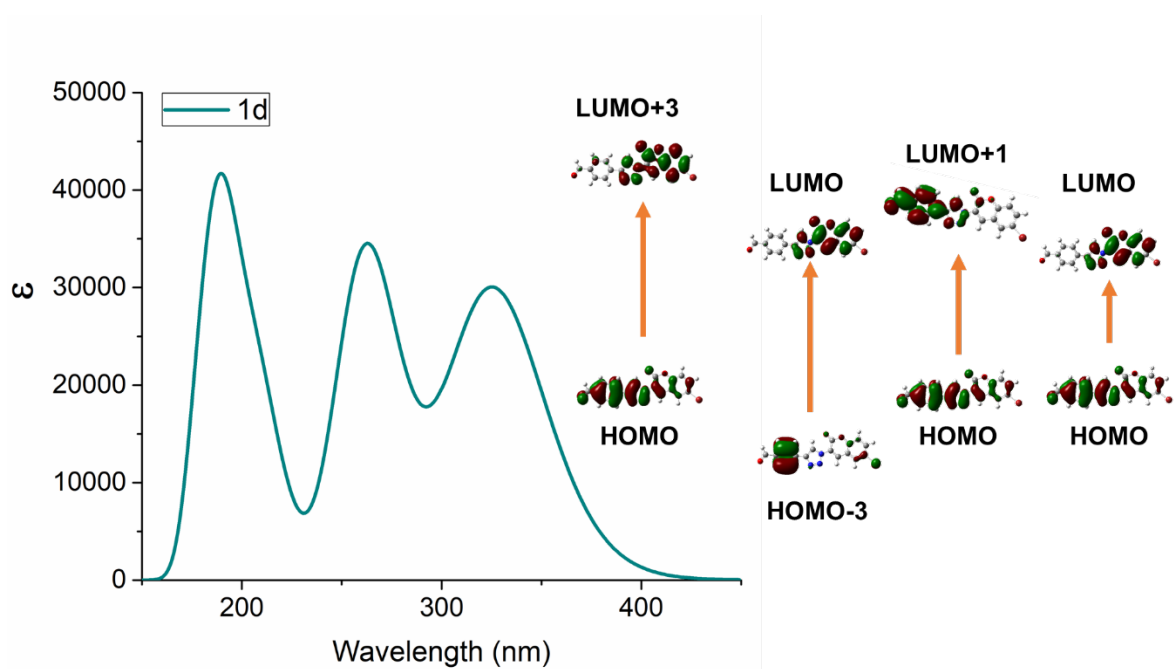

Molecular orbitals of the main electronic transitions calculated by TDDFT BhandHLYP/6-31G (d, p).

**Table S3.5.** First thirty electronic transitions of 1e, obtained by BhandHLYP/6-31G (d, p), oscillator strength and probable character of molecular orbital.

| <i>Molecule</i> | $\lambda_{ab}$<br>(nm) | $E(tr)$<br>(eV) | $OS(f)$       | <i>MO/Character</i>                                            |
|-----------------|------------------------|-----------------|---------------|----------------------------------------------------------------|
| <b>1e</b>       | 320.42                 | 3.8694          | <b>0.7260</b> | H-1→L (10%), <b>H→L (85%)</b>                                  |
|                 | 306.79                 | 4.0413          | 0.0001        | H-4→L (2%), H-4→L+1 (74%), H-4→L+7 (18%), H-4→L+12 (2%)        |
|                 | 277.68                 | 4.4650          | 0.0328        | H-3→L (11%), H-4→L+1 (74%), H-4→L+7 (18%), H-4→L+12 (2%)       |
|                 | 260.95                 | 4.7512          | <b>0.7823</b> | H-3→L (7%), H-1→L+1 (4%), H→L (2%), <b>H→L+1 (80%)</b>         |
|                 | 255.37                 | 4.8551          | 0.0306        | H-3→L (64%), H-1→L (11%), H-1→L+2 (6%), H→L+1 (8%), H→L+2 (3%) |

|        |        |               |                                                                                                                                                     |
|--------|--------|---------------|-----------------------------------------------------------------------------------------------------------------------------------------------------|
| 247.97 | 4.9999 | 0.0189        | H-2→L (13%), H-2→L+1 (59%), H→L+4 (10%), H→L+5 (10%)                                                                                                |
| 233.39 | 5.3124 | 0.0033        | H-8→L (26%), H-8→L+3 (5%), H-6→L (43%), H-6→L+4 (9%), H-6→L+5 (4%)                                                                                  |
| 229.17 | 5.4101 | 0.0015        | H-8→L (41%), H-8→L+2 (3%), H-8→L+3 (10%), H-6→L (22%), H-6→L+4 (7%), H-6→L+5 (3%)                                                                   |
| 223.86 | 5.5386 | 0.0154        | H-2→L (83%), H-2→L+1 (9%)                                                                                                                           |
| 214.25 | 5.7868 | 0.0705        | H-3→L (6%), H-3→L+2 (4%), H-3→L+3 (2%), H-2→L+1 (3%), H-1→L+2 (6%), H-1→L+3 (2%), H→L+2 (46%), H→L+4 (16%), H→L+5 (3%)                              |
| 209.33 | 5.9320 | 0.0641        | H-7→L (6%), H-5→L (3%), H-3→L (5%), H-3→L+3 (3%), H-2→L+1 (2%), H-1→L+2 (16%), H-1→L+3 (12%), H→L+3 (9%), H→L+4 (30%), H→L+5 (3%)                   |
| 204.96 | 6.0491 | <b>0.2086</b> | H-3→L+2 (18%), H-1→L+1 (5%), H-1→L+2 (14%), H-1→L+3 (20%), <b>H→L+3 (26%)</b> , H→L+4 (4%)                                                          |
| 204.22 | 6.0710 | 0.0105        | H-3→L (7%), H-5→L (56%), H-3→L+1 (2%), H-1→L+1 (13%), H→L+2 (2%)                                                                                    |
| 199.10 | 6.2273 | 0.2163        | H-7→L (18%), H-5→L (3%), H-3→L+1 (4%), H-3→L+2 (11%), H-2→L+1 (4%), H-1→L+1 (27%), H-1→L+4 (3%), H→L+4 (17%), H→L+5 (4%),                           |
| 195.88 | 6.3297 | 0.0000        | H-4→L (96%)                                                                                                                                         |
| 195.44 | 6.3437 | 0.0758        | H-7→L (19%), H-5→L (24%), H-3→L+2 (5%), H-2→L+1 (3%), H-1→L+1 (22%), H-1→L+3 (3%), H→L+2 (5%), H→L+3 (7%), H→L+4 (3%)                               |
| 190.80 | 6.4980 | 0.0948        | H-7→L (19%), H-2→L+1 (11%), H-1→L+2 (10%), H→L+2 (9%), H→L+4 (4%), H→L+5 (34%)                                                                      |
| 188.98 | 6.5609 | 0.0031        | H-6→L (17%), H-6→L+1 (50%), H-6→L+4 (6%), H-6→L+7 (11%)                                                                                             |
| 188.72 | 6.5699 | 0.1966        | H-5→L+1 (19%), H-3→L+4 (3%), H-2→L+1 (4%), H-2→L+4 (3%), H-2→L+5 (2%), H-1→L+2 (15%), H-1→L+4 (4%), H→L+2 (8%), H→L+3 (5%), H→L+5 (19%), H→L+7 (4%) |
| 185.63 | 6.6792 | 0.1722        | H-5→L+1 (4%), H-3→L+3 (20%), H-1→L+1 (3%), H-1→L+3 (10%), H→L+2 (15%), H→L+3 (23%), H→L+4 (4%), H→L+5 (4%)                                          |
| 183.77 | 6.7468 | 0.0007        | H-10→L+6 (4%), H-7→L+6 (3%), H-3→L+6 (29%), H-2→L+6 (3%), H-1→L+6 (52%), H→L+6 (7%)                                                                 |
| 183.67 | 6.7505 | 0.2356        | H-7→L (19%), H-5→L+1 (9%), H-3→L+2 (23%), H-1→L+3 (2%), H-1→L+4 (15%), H-1→L+5 (6%), H→L+3 (5%), H→L+5 (7%)                                         |
| 181.86 | 6.8177 | 0.1616        | H-10→L (3%), H-5→L+1 (26%), H-3→L+3 (3%), H-2→L+4 (9%), H-2→L+5 (9%), H-1→L+1 (7%), H-1→L+2 (7%), H-1→L+3 (6%), H-1→L+4 (11%), H→L+3 (7%)           |
| 177.24 | 6.9953 | 0.2177        | H-5→L+1 (7%), H-3→L+1 (3%), H-3→L+2 (3%), H-3→L+3 (6%), H-2→L+2 (2%), H-2→L+4 (21%), H-2→L+5 (8%), H-1→L+2 (3%), H-1→L+7 (3%), H→L+7 (29%)          |
| 176.55 | 7.0228 | 0.0001        | H-16→L (2%), H-15→L (6%), H-13→L (20%), H-13→L+4 (5%), H-13→L+5 (3%), H-11→L (7%), H-8→L (7%), H-8→L+2                                              |

|        |        |        |  |                                                                                                                                             |
|--------|--------|--------|--|---------------------------------------------------------------------------------------------------------------------------------------------|
|        |        |        |  | (5%), H-8→L+3 (3%), H-8→L+4 (2%), H-6→L+1 (14%), H-6→L+4 (6%), H-6→L+5 (2%)                                                                 |
| 176.07 | 7.0418 | 0.0001 |  | H-10→L (10%), H-3→L+1 (62%), H-2→L+4 (3%), H-1→L+1 (6%), H-1→L+3 (3%), H→L+7 (2%)                                                           |
| 174.3  | 7.1132 | 0.0168 |  | H-10→L (71%), H-3→L+1 (11%), H-1→L+3 (3%)                                                                                                   |
| 174.09 | 7.1218 | 0.0022 |  | H-16→L (7%), H-13→L (16%) H-13→L+4 (7%), H-13→L+5 (3%), H-6→L (11%), H-6→L+1 (7%), H-6→L+2 (4%), H-6→L+4 (19%), H-6→L+5 (6%)                |
| 172.68 | 7.1799 | 0.0966 |  | H-5→L+1 (9%), H-3→L+2 (8%), H-3→L+3 (21%), H-3→L+4 (5%), H-2→L+4 (10%), H-2→L+5 (2%), H-1→L+2 (7%), H-1→L+4 (15%), H-1→L+5 (5%), H→L+2 (3%) |
| 171.69 | 7.2212 | 0.0003 |  | H-9→L (86%), H-9→L+3 (4%)                                                                                                                   |

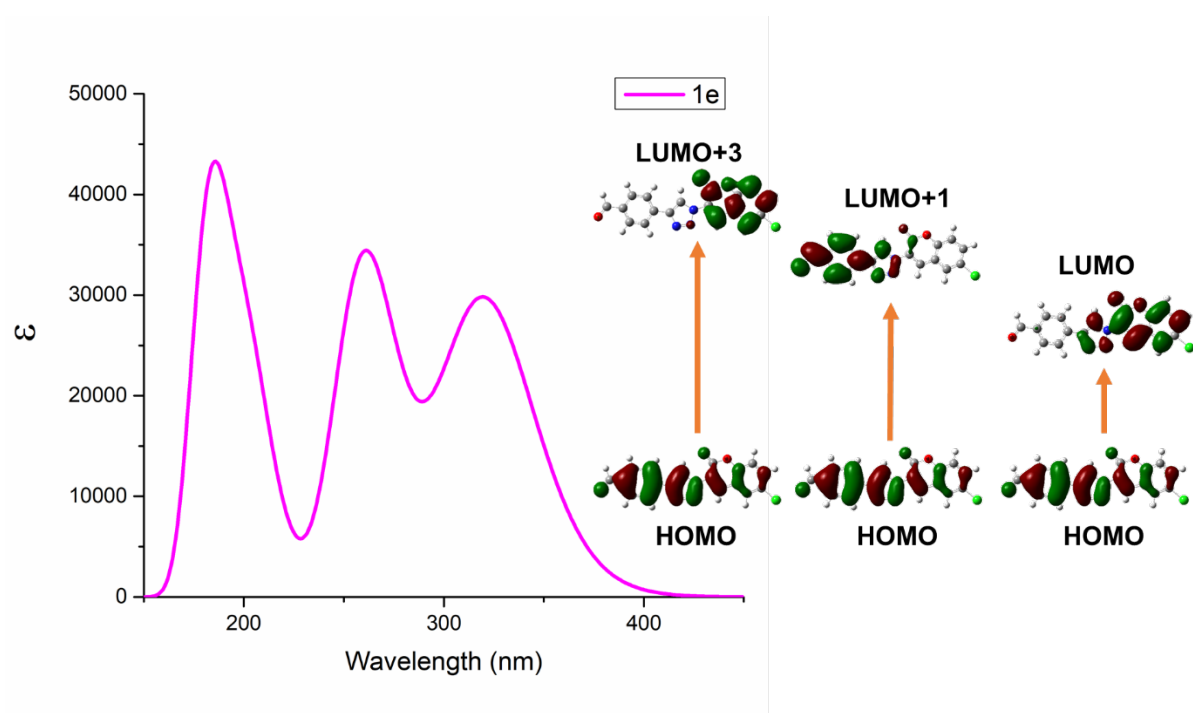

Molecular orbitals of the main electronic transitions calculated by TDDFT BhandHLYP/6-31G (d, p).

**Table S3.6.** First thirty electronic transitions of **1f**, obtained by BhandHLYP/6-31G (d, p), oscillator strength and probable character of molecular orbital.

| <i>Molecule</i> | $\lambda_{ab}$<br>(nm) | $E(tr)$<br>(eV) | $OS(f)$       | <i>MO/Character</i>                                                  |
|-----------------|------------------------|-----------------|---------------|----------------------------------------------------------------------|
| <b>1f</b>       | 312                    | 3.9733          | <b>0.7959</b> | H-1→L (10%), <b>H→L (83%)</b>                                        |
|                 | 306.03                 | 4.0514          | 0.0001        | H-4→L (3%), H-4→L+1 (74%), H-4→L+6 (18%)                             |
|                 | 290.08                 | 4.2741          | 0.0420        | H-2→L+2 (3%), H-1→L (88%), H→L (3%)                                  |
|                 | 261.49                 | 4.7414          | <b>0.3278</b> | H-2→L (14%), H-2→L+1 (4%), <b>H→L+1 (76%)</b>                        |
|                 | 260.73                 | 4.7552          | <b>0.3717</b> | H-5→L (3%), <b>H-2→L (66%)</b> . H-2→L+1 (3%), H→L (9%), H→L+1 (11%) |

|        |        |               |                                                                                                                                                          |
|--------|--------|---------------|----------------------------------------------------------------------------------------------------------------------------------------------------------|
| 247.40 | 5.0115 | 0.0172        | H-3→L (10%), H-3→L+1 (61%), H-2→L+3 (2%), H→L+3 (12%), H→L+5 (6%)                                                                                        |
| 230.90 | 5.3695 | 0.0021        | H-8→L (44%), H-8→L+1 (2%), H-8→L+2 (9%), H-8→L+4 (6%), H-6→L (24%), H-6→L+3 (3%), H-6→L+5 (4%)                                                           |
| 226.61 | 5.4713 | 0.0032        | H-8→L (22%), H-8→L+2 (5%), H-8→L+4 (3%), H-6→L (38%), H-6→L+1 (3%), H-6→L+2 (3%), H-8→L (44%), H-8→L+1 (2%), H-8→L+2 (9%), H-6→L+3 (9%), H-6→L+5 (9%)    |
| 216.28 | 5.7326 | 0.2071        | H-7→L (8%), H-3→L (14%), H-3→L+1 (4%), H-2→L+2 (7%), H-2→L+4 (2%), H-1→L (2%), H-1→L+2 (27%), H-1→L+3 (3%), H→L+2 (18%), H→L+5 (3%)                      |
| 214.93 | 5.7685 | 0.0054        | H-3→L (72%), H-3→L+1 (3%), H-1→L+2 (4%), H→L+2 (7%), H→L+3 (5%)                                                                                          |
| 209.75 | 5.9112 | 0.1029        | H-3→L+1 (5%), H-2→L+1 (13%), H-2→L+4 (6%), H-1→L+2 (24%), H→L+2 (12%), H→L+3 (16%), H→L+4 (9%), H→L+5 (3%)                                               |
| 204.23 | 6.0707 | 0.0063        | H-7→L (7%), H-7→L+1 (3%), H-5→L (17%), H-5→L+1 (3%), H-2→L+1 (44%), H→L+1 (4%), H→L+2 (3%), H→L+3 (8%)                                                   |
| 203.47 | 6.0934 | 0.0857        | H-3→L+1 (2%), H-2→L+2 (22%), H-1→L+2 (11%), H-1→L+4 (10%), H→L+2 (11%), H→L+3 (25%), H→L+5 (5%)                                                          |
| 199.75 | 6.2071 | 0.1253        | H-7→L (38%), H-5→L (12%), H-3→L+1 (3%), H-2→L+1 (9%), H-2→L+3 (3%), H-2→L+4 (2%), H-1→L+4 (10%), H→L+2 (8%), H→L+3 (8%)                                  |
| 195.19 | 6.3519 | 0.0015        | H-1→L+1 (91%)                                                                                                                                            |
| 193.33 | 6.4129 | 0.0400        | H-7→L (12%), H-5→L (54%), H-3→L+1 (2%), H-2→L+1 (10%), H-1→L+4 (6%)                                                                                      |
| 190.97 | 6.4924 | 0.1770        | H-7→L (8%), H-5→L+1 (4%), H-3→L+1 (15%), H-2→L+3 (5%), H→L+2 (2%), H→L+3 (5%), H→L+4 (6%), H→L+5 (45%)                                                   |
| 189.55 | 6.5408 | 0.0022        | H-6→L (14%), H-6→L+1 (50%), H-6→L+3 (2%), H-6→L+6 (10%), H-4→L (12%)                                                                                     |
| 187.81 | 6.6016 | 0.0002        | H-6→L (5%), H-6→L+1 (6%), H-4→L (83%), H-4→L+1 (3%)                                                                                                      |
| 186.73 | 6.6396 | 0.1405        | H-5→L (3%), H-5→L+1 (32%), H-3→L+3 (5%), H-2→L+2 (12%), H-2→L+5 (3%), H-1→L+4 (3%), H→L+2 (12%), H→L+4 (5%), H→L+6 (8%)                                  |
| 183.36 | 6.7619 | 0.1772        | H-7→L (2%), H-5→L+1 (10%), H-3→L+3 (3%), H-2→L+1 (2%), H-2→L+4 (3%), H-1→L+4 (35%), H-1→L+5 (3%), H→L+2 (14%), H→L+3 (4%), H→L+4 (9%), H→L+5 (3%)        |
| 182.74 | 6.7849 | <b>0.3779</b> | H-7→L (14%), H-2→L+2 (13%), <b>H-2→L+3 (18%)</b> , H-2→L+4 (12%), H-2→L+5 (7%), H-1→L+2 (5%), H-1→L+4 (6%), H→L+4 (6%), H→L+5 (6%)                       |
| 180.99 | 6.8504 | 0.0553        | H-5→L+1 (16%), H-3→L+3 (5%), H-3→L+5 (3%), H-2→L+2 (8%), H-2→L+3 (3%), H-2→L+4 (6%), H-2→L+5 (2%), H-1→L+2 (11%), H-1→L+4 (3%), H→L+4 (22%), H→L+5 (10%) |
| 176.96 | 7.0062 | 0.2009        | H-5→L+1 (4%), H-3→L+2 (3%), H-3→L+3 (23%), H-3→L+5 (6%), H-2→L+2 (6%), H-2→L+6 (4%), H→L+2 (2%), H→L+3 (2%), H→L+6 (34%)                                 |
| 175.67 | 7.0578 | 0.0002        | H-17→L (2%), H-15→L (5%), H-13→L (15%), H-13→L+1 (2%), H-13→L+3 (3%), H-13→L+5 (4%), H-10→L (8%), H-                                                     |

|        |        |        |  |                                                                                                                                                                                                          |
|--------|--------|--------|--|----------------------------------------------------------------------------------------------------------------------------------------------------------------------------------------------------------|
|        |        |        |  | 8→L (11%), H-8→L+2 (14%), H-8→L+4 (4%), H-6→L+1 (8%), H-6→L+3 (4%), H-6→L+5 (2%)                                                                                                                         |
| 172.47 | 7.1888 | 0.1751 |  | H-9→L (3%), H-5→L+1 (18%), H-3→L+3 (22%), H-3→L+5 (5%), H-2→L+2 (4%), H-2→L+3 (3%), H-2→L+5 (3%), H-1→L+3 (4%), H-1→L+4 (3%), H→L+4 (2%), H→L+6 (16%)                                                    |
| 172.42 | 7.1910 | 0.0024 |  | H-15→L (8%), H-13→L (17%), H-13→L+3 (5%), H-13→L+5 (5%), H→L (3%), H→L+5 (2%), H-6→L (9%), H-6→L+1 (3%), H-6→L+2 (5%), H-6→L+3 (10%), H-6→L+5 (7%)                                                       |
| 171.4  | 7.2337 | 0.1824 |  | H-9→L (6%), H-5→L+1 (5%), H-2→L+2 (6%), H-2→L+3 (19%), H-2→L+5 (6%), H-1→L+4 (7%), H→L+2 (3%), H→L+4 (6%), H→L+6 (24%)                                                                                   |
| 170.01 | 7.2928 | 0.0574 |  | H-2→L+2 (6%), H-2→L+3 (4%), H-1→L+2 (7%), H-1→L+3 (50%), H-1→L+5 (21%), H→L+4 (2%)                                                                                                                       |
| 169.01 | 7.3357 | 0.0003 |  | H-15→L (3%), H-13→L (4%), H-13→L+1 (2%), H→L (3%), H→L+1 (4%), H-8→L (14%), H-8→L+2 (19%), H-8→L+4 (5%), H-8→L+11 (2%), H-6→L (5%), H-6→L+1 (6%), H-6→L+2 (7%), H-6→L+3 (8%), H-6→L+5 (5%), H-4→L+3 (2%) |

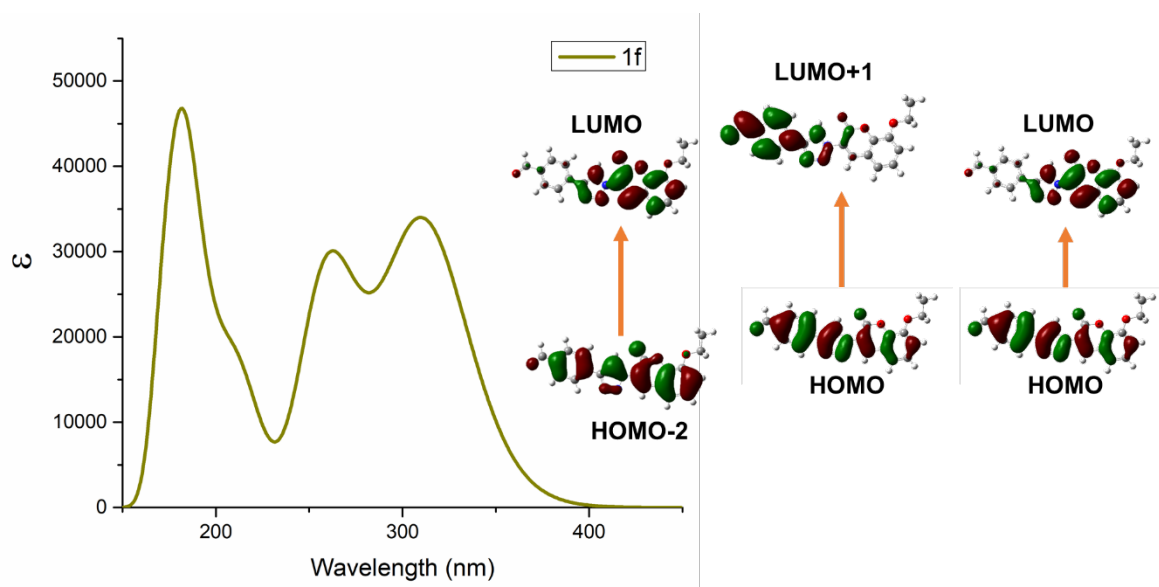

Molecular orbitals of the main electronic transitions calculated by TDDFT BhandHLYP/6-31G (d, p).

**Table S3.7.** First thirty electronic transitions of **1g**, obtained by BhandHLYP/6-31G (d, p), oscillator strength and probable character of molecular orbital.

| <b>Molecule</b> | <b><math>\lambda_{ab}</math><br/>(nm)</b> | <b>E(tr)<br/>(eV)</b> | <b>OS(f)</b>  | <b>MO/Character</b>                                       |
|-----------------|-------------------------------------------|-----------------------|---------------|-----------------------------------------------------------|
| <b>1g</b>       | 318.24                                    | 3.8959                | <b>0.9188</b> | H-1→L (8%), <b>H→L (86%)</b>                              |
|                 | 306.00                                    | 4.0518                | 0.0001        | H-4→L (3%), H-4→L+1 (74%), H-4→L+6 (18%)                  |
|                 | 266.77                                    | 4.6476                | 0.0114        | H-5→L (2%), H-3→L (4%), H-1→L (76%), H→L (6%), H→L+1 (7%) |
|                 | 262.38                                    | 4.7254                | <b>0.6522</b> | H-1→L (4%), H-1→L+1 (12%), H→L (3%), <b>H→L+1 (75%)</b>   |
|                 | 252.46                                    | 4.9111                | 0.0050        | H-3→L (64%), H-1→L (4%), H-1→L+2 (12%), H→L+2 (13%)       |

|        |        |               |                                                                                                                                                                      |
|--------|--------|---------------|----------------------------------------------------------------------------------------------------------------------------------------------------------------------|
| 247.31 | 5.0133 | 0.0168        | H-2→L (8%), H-2→L+1 (63%), H-1→L+3 (3%), H-1→L+5 (2%), H→L+3 (8%), H→L+4 (4%), H→L+5 (4%)                                                                            |
| 228.91 | 5.4162 | 0.0021        | H-8→L (46%), H-8→L+1 (2%), H-8→L+2 (3%), H-8→L+3 (7%), H-8→L+4 (6%), H-6→L+3 (3%), H-6→L+8 (4%)                                                                      |
| 225.06 | 5.5089 | 0.0034        | H-8→L (21%), H-8→L+3 (3%), H-8→L+4 (3%), H-6→L (37%), H-6→L+1 (3%), H-6→L+2 (4%), H-6→L+3 (8%), H-6→L+5 (9%)                                                         |
| 219.48 | 5.6490 | 0.0878        | H-7→L (3%), H-3→L (23%), H-1→L+1 (6%), H-1→L+2 (10%), H→L+2 (44%), H→L+3 (2%), H→L+5 (2%)                                                                            |
| 214.65 | 5.7761 | 0.0212        | H-2→L (88%), H-2→L+1 (6%)                                                                                                                                            |
| 213.38 | 5.8106 | 0.0027        | H-7→L+1 (2%), H-3→L (5%), H-1→L+1 (29%), H-1→L+2 (9%), H-1→L+3 (2%), H→L+1 (5%), H→L+3 (27%), H→L+4 (2%), H→L+5 (5%)                                                 |
| 208.10 | 5.9580 | 0.0240        | H-7→L (5%), H-5→L (5%), H-5→L+1 (2%), H-2→L+1 (2%), H-1→L+1 (35%), H-1→L+2 (2%), H→L+1 (6%), H→L+2 (3%), H→L+3 (30%)                                                 |
| 201.42 | 6.1555 | 0.0569        | H-7→L (21%), H-5→L (7%), H-3→L+2 (3%), H-2→L+1 (4%), H-1→L+2 (4%), H-1→L+3 (8%), H-1→L+4 (7%), H→L+4 (32%), H→L+5 (4%)                                               |
| 198.78 | 6.2371 | 0.1059        | H-7→L (37%), H-5→L (9%), H-3→L+2 (20%), H-1→L+1 (2%), H-1→L+4 (6%), H→L+2 (6%), H→L+3 (2%), H→L+4 (10%), H→L+5 (4%)                                                  |
| 193.83 | 6.3964 | 0.0702        | H-7→L (8%), H-5→L (52%), H-3→L+2 (3%), H-2→L+1 (6%), H-1→L+1 (5%), H-1→L+3 (3%), H→L+4 (4%), H→L+5 (8%)                                                              |
| 192.03 | 6.4563 | 0.1548        | H-7→L (12%), H-5→L (11%), H-5→L+1 (3%), H-2→L+1 (12%), H-1→L+3 (3%), H-1→L+4 (5%), H→L+2 (3%), H→L+3 (4%), H→L+4 (6%), H→L+5 (34%)                                   |
| 189.45 | 6.5443 | 0.0022        | H-6→L (15%), H-6→L+1 (51%), H-6→L+3 (2%), H-6→L+6 (10%), H-4→L (10%)                                                                                                 |
| 189.02 | 6.5592 | 0.0092        | H-7→L (3%), H-7→L+3 (2%), H-5→L+1 (9%), H-1→L+2 (32%), H-1→L+3 (16%), H-1→L+5 (8%), H→L+2 (11%), H→L+3 (4%), H→L+4 (3%), H→L+6 (3%)                                  |
| 187.50 | 6.6125 | 0.0002        | H-6→L (2%), H-6→L+1 (10%), H-4→L (3%), H-4→L+1 (2%)                                                                                                                  |
| 185.25 | 6.6929 | 0.4117        | H-7→L (4%), H-5→L (4%), H-5→L+1 (44%), H-5→L+2 (5%), H-2→L+3 (7%), H-2→L+4 (4%), H-2→L+5 (5%), H-1→L+1 (2%), H-1→L+2 (4%), H-1→L+3 (2%), H→L+3 (4%), H→L+6 (3%)      |
| 181.80 | 6.8199 | 0.0918        | H-7→L+2 (6%), H-3→L+4 (5%), H-1→L+2 (8%), H-1→L+3 (24%), H-1→L+5 (9%), H→L+2 (15%), H→L+3 (5%), H→L+4 (3%), H→L+5 (7%), H→L+6 (3%)                                   |
| 178.94 | 6.9289 | <b>0.2307</b> | H-9→L (2%), H-7→L (2%), H-5→L+1 (6%), H-3→L+1 (2%), H-3→L+2 (36%), H-2→L+3 (3%), H→L+4 (13%), H→L+5 (10%), H→L+6 (8%)                                                |
| 176.70 | 7.0167 | <b>0.4490</b> | H-5→L+1 (7%), H-3→L+1 (3%), H-3→L+2 (4%), H-3→L+4 (4%), H-2→L+2 (3%), H-2→L+3 (21%), H-2→L+4 (8%), H-2→L+5 (5%), H-1→L+3 (2%), H-1→L+5 (2%), H→L+4 (4%), H→L+6 (22%) |



|        |        |        |                                                                                                                                                                                          |
|--------|--------|--------|------------------------------------------------------------------------------------------------------------------------------------------------------------------------------------------|
| 174.70 | 7.0971 | 0.0005 | H-13→L (5%), H-11→L (15%), H-11→L+1 (3%), H-11→L+3 (4%), H-11→L+5 (4%), H-10→L (8%), H-8→L (6%), H-8→L+2 (5%), H-8→L+3 (4%), H-6→L+1 (12%), H-6→L+2 (2%), H-6→L+3 (9%), H-6→L+5 (5%)     |
| 172.47 | 7.1887 | 0.0324 | H-5→L+1 (12%), H-3→L+1 (34%), H-3→L+3 (4%), H-3→L+4 (6%), H-2→L+3 (10%), H-2→L+4 (4%), H-2→L+5 (3%), H-1→L+4 (4%), H→L+6 (12%)                                                           |
| 172.28 | 7.1966 | 0.0023 | H-13→L (3%), H-11→L (15%), H-11→L+2 (2%), H-11→L+3 (5%), H-11→L+5 (6%), H-10→L (3%), H-10→L+3 (2%), H-10→L+5 (2%), H-6→L (13%), H-6→L+1 (2%), H-6→L+2 (5%), H-6→L+3 (15%), H-6→L+5 (15%) |
| 171.99 | 7.2089 | 0.1052 | H-9→L (4%), H-5→L+1 (8%), H-3→L+1 (30%), H-3→L+2 (3%), H-3→L+3 (2%), H-2→L+3 (5%), H-2→L+4 (2%), H-1→L+6 (3%), H→L+4 (4%), H→L+6 (26%)                                                   |
| 168.57 | 7.3552 | 0.2163 | H-9→L (6%), H-3→L+1 (25%), H-3→L+2 (4%), H-3→L+3 (7%), H-3→L+4 (28%), H-3→L+5 (3%), H-1→L+2 (4%), H-1→L+3 (3%), H-1→L+4 (10%)                                                            |
| 168.15 | 7.3732 | 0.1895 | H-9→L (24%), H-7→L+1 (2%), H-3→L+2 (8%), H-3→L+3 (6%), H-3→L+4 (12%), H-1→L+2 (5%), H-6→L+3 (6%), H-6→L+4 (19%), H-6→L+5 (3%)                                                            |
| 167.57 | 7.3988 | 0.0045 | H-12→L (3%), H-9→L (45%), H-1→L+5 (3%), H→L+4 (6%), H→L+5 (4%)                                                                                                                           |

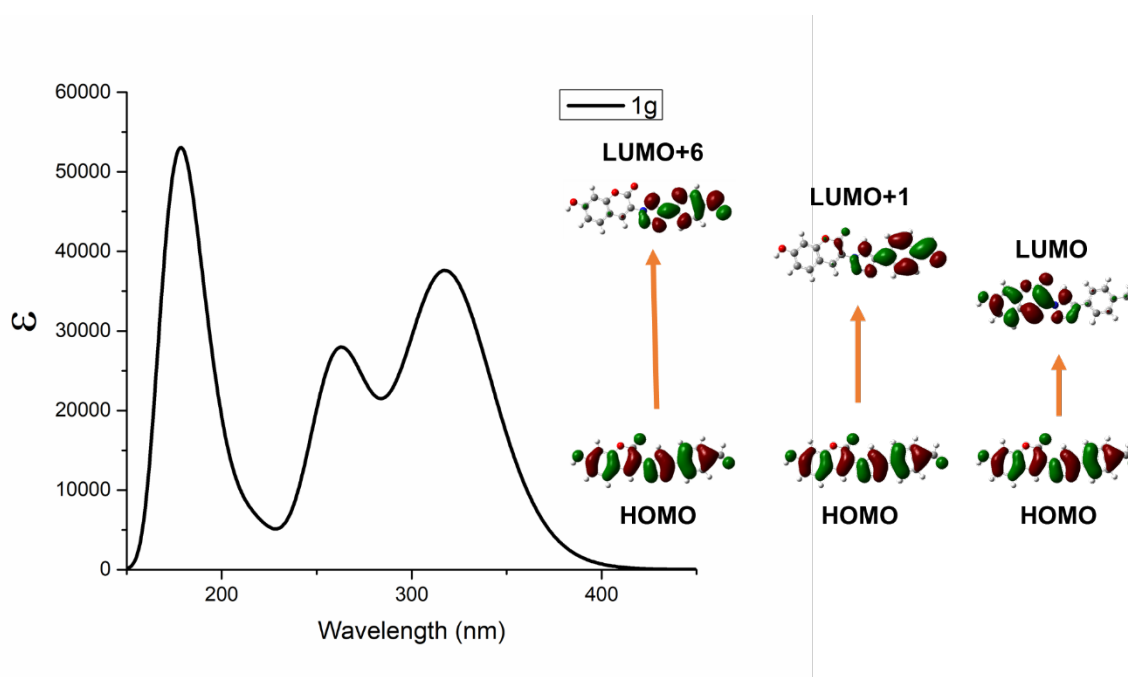

Molecular orbitals of the main electronic transitions calculated by TDDFT BhandHLYP/6-31G (d, p).

**TDDFT (dichloromethane)**

**Table S3.8.** First thirty electronic transitions of **1a**, obtained by BhandHLYP/6-31G (d, p), CPCM solvent model (dichloromethane), oscillator strength and probable character of molecular orbital.

| <i>Molecule</i> | $\lambda_{ab}$<br>(nm) | E(tr)<br>(eV) | OS(f)         | <i>MO/Character</i>                                                   |
|-----------------|------------------------|---------------|---------------|-----------------------------------------------------------------------|
| <b>1a</b>       | 318.4798               | 3.8935        | <b>1.0616</b> | H-1->LUMO (12%), HOMO->LUMO (83%)                                     |
|                 | 303.4069               | 4.0869        | 0.0001        | H-4->L+1 (75%), H-4->L+6 (16%)                                        |
|                 | 274.3802               | 4.5193        | <b>0.251</b>  | H-2->LUMO (20%), H-1->LUMO (30%), HOMO->L+1 (38%)                     |
|                 | 268.7655               | 4.6137        | <b>0.2251</b> | H-2->LUMO (37%), HOMO->L+1 (39%)                                      |
|                 | 256.9567               | 4.8257        | <b>0.206</b>  | H-2->LUMO (31%), H-1->LUMO (44%)                                      |
|                 | 250.5693               | 4.9487        | 0.0312        | H-3->L+1 (68%)                                                        |
|                 | 227.5148               | 5.4502        | 0.0016        | H-8->LUMO (53%), H-8->L+2 (12%)                                       |
|                 | 221.5824               | 5.5961        | 0.0065        | H-8->LUMO (10%), H-6->LUMO (30%), H-6->L+2 (13%)                      |
|                 | 219.5226               | 5.6486        | 0.0523        | H-1->L+1 (27%), HOMO->L+2 (40%)                                       |
|                 | 212.5237               | 5.8346        | 0.0316        | H-1->L+1 (39%), HOMO->L+2 (29%)                                       |
|                 | 209.8581               | 5.9088        | 0.0234        | H-3->LUMO (85%)                                                       |
|                 | 205.8922               | 6.0226        | 0.0482        | H-1->L+4 (14%), HOMO->L+3 (24%), HOMO->L+4 (17%)                      |
|                 | 201.1914               | 6.1633        | 0.1398        | H-1->L+2 (19%), HOMO->L+3 (18%), HOMO->L+4 (16%)                      |
|                 | 198.7627               | 6.2386        | 0.2707        | H-7->LUMO (20%), H-2->L+2 (15%), H-1->L+3 (12%),<br>HOMO->L+5 (14%)   |
|                 | 196.2924               | 6.3171        | 0.1494        | H-7->LUMO (13%), H-5->LUMO (19%), HOMO->L+4 (11%),<br>HOMO->L+5 (14%) |
|                 | 193.5741               | 6.4058        | 0.0663        | H-5->LUMO (19%), H-5->L+1 (32%), HOMO->L+5 (10%)                      |
|                 | 189.5261               | 6.5426        | 0.0014        | H-5->LUMO (18%), H-2->L+1 (10%), H-1->L+2 (29%)                       |
|                 | 188.0030               | 6.5956        | 0.0978        | H-2->L+1 (60%)                                                        |
|                 | 187.1883               | 6.6243        | 0.1477        | H-7->LUMO (18%), H-5->LUMO (22%), H-5->L+1 (22%)                      |
|                 | 186.5265               | 6.6478        | 0.1075        | H-6->LUMO (13%), H-6->L+1 (28%), H-2->L+1 (15%)                       |
|                 | 182.2118               | 6.8053        | 0.1317        | H-2->L+2 (16%), HOMO->L+5 (17%)                                       |
|                 | 180.7350               | 6.8609        | <b>0.6853</b> | H-3->L+3 (26%), HOMO->L+6 (13%)                                       |
|                 | 179.1446               | 6.9218        | 0.0068        | H-4->LUMO (88%)                                                       |
|                 | 178.7211               | 6.9382        | 0.1446        | H-2->L+4 (37%), H-2->L+5 (16%)                                        |
|                 | 175.2352               | 7.0762        | 0.0761        | H-12->LUMO (10%), HOMO->L+6 (27%)                                     |
|                 | 174.8177               | 7.0931        | 0.06          | H-12->LUMO (17%), H-6->L+1 (10%), HOMO->L+6 (18%)                     |
|                 | 170.9702               | 7.2527        | 0.0087        | H-13->LUMO (19%)                                                      |
|                 | 169.0655               | 7.3344        | 0.043         | H-9->LUMO (39%)                                                       |
|                 | 168.8307               | 7.3446        | 0.0006        | H-12->LUMO (10%), H-10->L+1 (50%)                                     |
|                 | 167.6028               | 7.3984        | 0.146         | H-9->LUMO (18%), H-2->L+2 (10%), H-1->L+3 (32%), H-1->L+5 (12%)       |

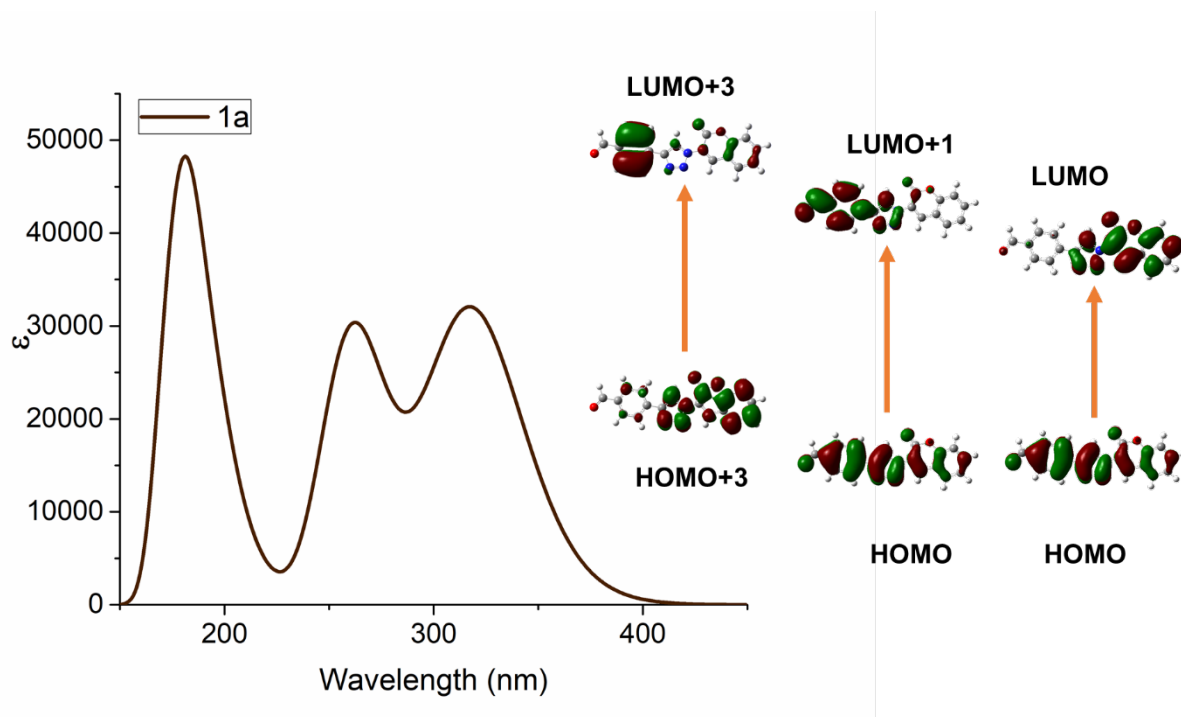

Molecular orbitals of the main electronic transitions calculated by TDDFT BhandHLYP/6-31G (d, p) and CPCM in dichloromethane.

**Table S3.9.** First thirty electronic transitions of **1b**, obtained by BhandHLYP/6-31G (d, p), CPCM solvent model (dichloromethane), oscillator strength and probable character of molecular orbital.

| <i>Molecule</i> | $\lambda_{ab}$<br>(nm) | $E(tr)$<br>(eV) | $OS(f)$       | <i>MO/Character</i>                                                              |
|-----------------|------------------------|-----------------|---------------|----------------------------------------------------------------------------------|
| <b>1b</b>       | 322.64                 | 3.8433          | <b>0.8154</b> | HOMO->LUMO (85%)                                                                 |
|                 | 297.95                 | 4.1618          | 0.0001        | H-4->L+1 (74%), H-4->L+6 (17%)                                                   |
|                 | 294.74                 | 4.2070          | <b>0.3513</b> | H-2->LUMO (11%), H-1->LUMO (74%)                                                 |
|                 | 269.77                 | 4.5965          | <b>0.4187</b> | H-1->L+1 (25%), HOMO->L+1 (59%)                                                  |
|                 | 255.27                 | 4.8576          | <b>0.2298</b> | H-2->LUMO (68%)                                                                  |
|                 | 249.16                 | 4.9767          | 0.0307        | H-3->L+1 (65%)                                                                   |
|                 | 224.88                 | 5.5141          | 0.0032        | H-8->LUMO (40%), H-7->LUMO (25%)                                                 |
|                 | 220.34                 | 5.6277          | 0.0044        | H-8->LUMO (25%), H-7->LUMO (28%), H-7->L+2 (15%)                                 |
|                 | 219.36                 | 5.6528          | 0.0502        | H-2->L+1 (15%), H-1->L+1 (34%), HOMO->L+1 (27%), HOMO->L+2 (11%)                 |
|                 | 212.69                 | 5.8300          | 0.0119        | H-1->L+4 (18%), HOMO->L+2 (39%), HOMO->L+4 (11%)                                 |
|                 | 210.66                 | 5.8863          | 0.1423        | H-1->L+2 (15%), H-1->L+4 (10%), HOMO->L+2 (11%), HOMO->L+4 (19%)                 |
|                 | 209.43                 | 5.9210          | 0.027         | H-3->LUMO (81%)                                                                  |
|                 | 206.20                 | 6.0135          | <b>0.3987</b> | H-1->L+2 (13%), H-1->L+3 (14%), H-1->L+5 (10%), HOMO->L+2 (11%), HOMO->L+4 (12%) |
|                 | 202.19                 | 6.1329          | 0.0399        | H-2->L+1 (47%), H-1->L+1 (24%)                                                   |
|                 | 198.91                 | 6.2341          | 0.2319        | H-6->LUMO (29%), H-3->L+1 (12%), H-2->L+2 (12%), HOMO->L+3 (18%)                 |

|  |        |        |               |                                                                   |
|--|--------|--------|---------------|-------------------------------------------------------------------|
|  | 193.53 | 6.4074 | 0.2032        | H-6->LUMO (27%), H-1->L+3 (10%), HOMO->L+3 (10%), HOMO->L+5 (15%) |
|  | 190.75 | 6.5005 | 0.0084        | H-5->LUMO (40%), H-5->L+1 (22%)                                   |
|  | 187.56 | 6.6112 | 0.0136        | H-2->L+2 (23%), H-1->L+2 (17%), H-1->L+4 (20%)                    |
|  | 187.45 | 6.6149 | 0.002         | H-7->LUMO (23%), H-7->L+1 (52%)                                   |
|  | 186.71 | 6.6414 | <b>0.4609</b> | H-6->LUMO (12%), H-5->LUMO (22%), H-5->L+1 (26%)                  |
|  | 183.79 | 6.7470 | <b>0.2979</b> | H-2->L+4 (30%), H-1->L+4 (16%), HOMO->L+4 (11%)                   |
|  | 182.26 | 6.8035 | 0.0718        | H-2->L+3 (10%), H-1->L+2 (10%), HOMO->L+5 (27%)                   |
|  | 180.32 | 6.8768 | 0.2312        | H-3->L+2 (13%), H-3->L+3 (19%), H-1->L+2 (11%), HOMO->L+6 (15%)   |
|  | 178.68 | 6.9397 | 0             | H-4->LUMO (92%)                                                   |
|  | 176.06 | 7.0431 | 0.1348        | H-9->LUMO (40%), H-5->L+1 (10%)                                   |
|  | 174.30 | 7.1140 | 0.1244        | H-9->LUMO (41%)                                                   |
|  | 174.23 | 7.1169 | 0.0005        | H-15->LUMO (16%), H-10->LUMO (15%), H-8->L+2 (10%)                |
|  | 173.12 | 7.1625 | 0.0245        | H-2->L+2 (14%), H-2->L+5 (10%), H-1->L+6 (11%), HOMO->L+6 (26%)   |
|  | 170.43 | 7.2756 | 0.0007        | H-13->LUMO (25%), H-13->L+2 (14%)                                 |
|  | 167.70 | 7.3939 | 0.0007        | H-11->L+1 (53%)                                                   |

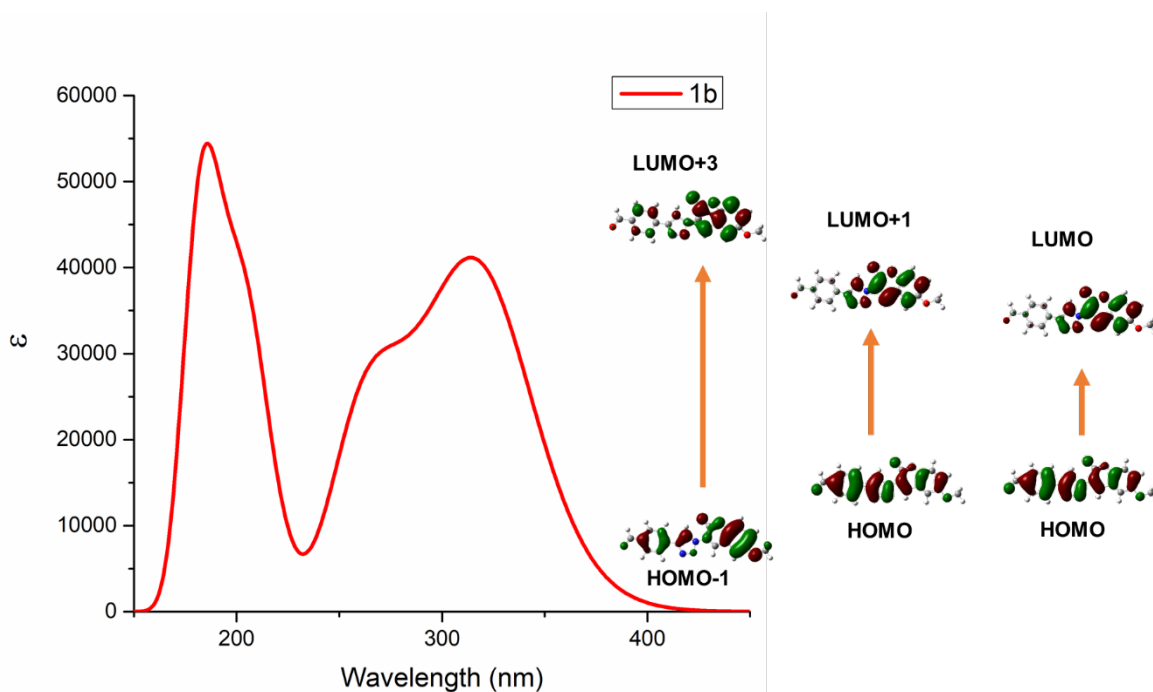

Molecular orbitals of the main electronic transitions calculated by TDDFT BhandHLYP/6-31G (d, p) and CPCM in dichloromethane.

**Table S3.10.** First thirty electronic transitions of **1c**, obtained by BhandHLYP/6-31G (d, p), CPCM solvent model (dichloromethane), oscillator strength and probable character of molecular orbital.

| <i>Molecule</i> | $\lambda_{ab}$<br>(nm) | E(tr)<br>(eV) | OS(f) | MO/Character |
|-----------------|------------------------|---------------|-------|--------------|
|-----------------|------------------------|---------------|-------|--------------|

|    |        |        |               |                                                                                  |
|----|--------|--------|---------------|----------------------------------------------------------------------------------|
| 1c | 360.19 | 3.4426 | <b>1.3311</b> | HOMO->LUMO (93%)                                                                 |
|    | 302.98 | 4.0927 | 0.0001        | H-5->L+1 (72%), H-5->L+6 (15%)                                                   |
|    | 282.47 | 4.3899 | <b>0.5041</b> | H-1->LUMO (13%), H-1->L+1 (33%), HOMO->L+1 (49%)                                 |
|    | 265.57 | 4.6692 | 0.0128        | H-2->LUMO (55%), HOMO->L+2 (17%), HOMO->L+3 (10%)                                |
|    | 260.38 | 4.7622 | 0.0294        | H-1->LUMO (74%)                                                                  |
|    | 250.45 | 4.9511 | 0.0409        | H-3->LUMO (11%), H-3->L+1 (61%)                                                  |
|    | 248.30 | 4.9940 | 0.1298        | H-1->L+1 (43%), HOMO->L+1 (37%)                                                  |
|    | 237.91 | 5.2120 | 0.1084        | H-2->LUMO (32%), HOMO->L+2 (37%), HOMO->L+3 (13%)                                |
|    | 226.65 | 5.4709 | 0.11          | HOMO->L+2 (25%), HOMO->L+3 (11%), HOMO->L+4 (43%)                                |
|    | 222.22 | 5.5801 | 0.0045        | H-9->LUMO (49%), H-9->L+2 (13%)                                                  |
|    | 219.00 | 5.6622 | 0.1228        | H-4->LUMO (76%)                                                                  |
|    | 216.75 | 5.7208 | 0.015         | H-7->LUMO (25%), H-7->L+1 (13%), H-7->L+2 (18%), H-7->L+4 (10%)                  |
|    | 211.84 | 5.8535 | 0.0524        | HOMO->L+5 (69%)                                                                  |
|    | 203.73 | 6.0866 | 0.1054        | H-3->LUMO (12%), H-1->L+2 (19%), H-1->L+3 (21%), HOMO->L+4 (12%)                 |
|    | 200.86 | 6.1735 | 0.0315        | H-3->LUMO (70%), H-3->L+1 (19%)                                                  |
|    | 197.01 | 6.2940 | 0.0995        | H-1->L+2 (35%), H-1->L+4 (21%), HOMO->L+3 (17%)                                  |
|    | 195.66 | 6.3374 | 0.0499        | H-6->LUMO (22%), H-6->L+1 (34%), H-4->L+1 (10%)                                  |
|    | 190.95 | 6.4937 | 0.2859        | H-2->L+1 (68%), H-2->L+2 (13%)                                                   |
|    | 187.74 | 6.6050 | <b>0.7133</b> | H-8->LUMO (10%), H-6->LUMO (13%), H-2->L+1 (12%), H-2->L+2 (20%), H-2->L+3 (12%) |
|    | 186.97 | 6.6321 | 0.0151        | H-7->LUMO (32%), H-7->L+1 (30%)                                                  |
|    | 185.66 | 6.6789 | 0.0233        | H-6->L+1 (12%), H-4->L+1 (14%), HOMO->L+3 (18%), HOMO->L+4 (11%)                 |
|    | 184.38 | 6.7253 | 0.054         | H-6->LUMO (27%), H-4->L+1 (22%), H-2->L+2 (11%)                                  |
|    | 182.77 | 6.7847 | 0.0937        | H-6->L+1 (11%), H-4->L+1 (17%), H-1->L+3 (16%)                                   |
|    | 182.21 | 6.8054 | 0.1034        | H-3->L+3 (14%), H-1->L+6 (27%), HOMO->L+6 (17%)                                  |
|    | 179.07 | 6.9248 | 0.0211        | H-8->LUMO (19%), H-6->LUMO (10%), H-4->L+2 (18%), H-1->L+4 (16%)                 |
|    | 178.15 | 6.9603 | <b>0.449</b>  | H-8->LUMO (12%), H-3->L+3 (19%)                                                  |
|    | 177.11 | 7.0012 | 0.0466        | H-8->LUMO (16%), H-2->L+5 (18%)                                                  |
|    | 174.12 | 7.1217 | 0.1032        | H-8->LUMO (12%), H-2->L+4 (19%), H-2->L+5 (32%)                                  |
|    | 172.91 | 7.1712 | 0.0049        | H-5->LUMO (30%)                                                                  |
|    | 172.61 | 7.1839 | 0.0034        | H-5->LUMO (58%)                                                                  |

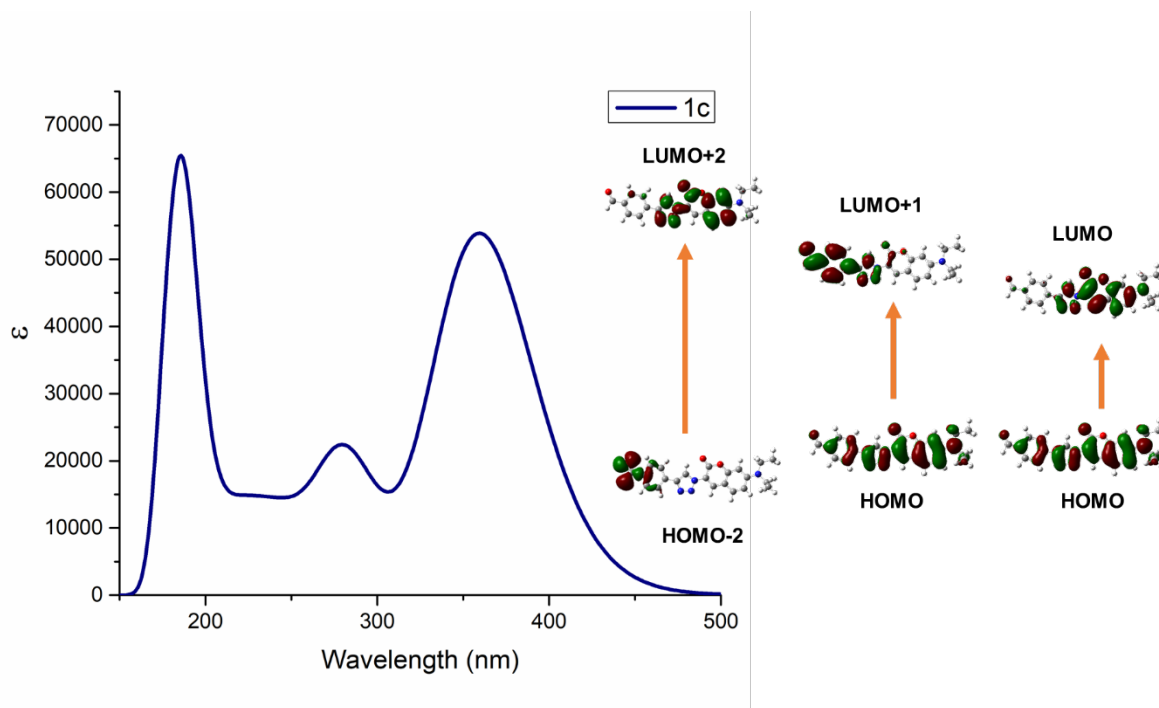

Molecular orbitals of the main electronic transitions calculated by TDDFT BhandHLYP/6-31G (d, p) and CPCM in dichloromethane.

**Table S3.11.** First thirty electronic transitions of **1d**, obtained by BhandHLYP/6-31G (d, p), CPCM solvent model (dichloromethane), oscillator strength and probable character of molecular orbital.

| <i>Molecule</i> | $\lambda_{ab}$<br>(nm) | $E(tr)$<br>(eV) | $OS(f)$       | <i>MO/Character</i>                                             |
|-----------------|------------------------|-----------------|---------------|-----------------------------------------------------------------|
| <b>1d</b>       | 323.82                 | 3.8293          | <b>1.0112</b> | H-1->LUMO (11%), HOMO->LUMO (82%)                               |
|                 | 303.51                 | 4.0855          | 0.0001        | H-4->L+1 (76%), H-4->L+7 (16%)                                  |
|                 | 281.21                 | 4.4095          | 0.0701        | H-2->LUMO (15%), H-1->LUMO (64%)                                |
|                 | 270.35                 | 4.5867          | <b>0.5029</b> | H-1->L+1 (10%), HOMO->L+1 (74%)                                 |
|                 | 258.94                 | 4.7887          | <b>0.2246</b> | H-2->LUMO (60%), H-1->LUMO (15%)                                |
|                 | 250.87                 | 4.9428          | 0.0323        | H-3->L+1 (64%)                                                  |
|                 | 229.38                 | 5.4059          | 0.0021        | H-10->LUMO (48%), H-8->LUMO (16%)                               |
|                 | 224.67                 | 5.5192          | 0.0042        | H-10->LUMO (15%), H-8->LUMO (33%), H-8->L+3 (10%)               |
|                 | 218.98                 | 5.6627          | 0.1022        | H-1->L+1 (12%), HOMO->L+2 (42%), HOMO->L+3 (14%)                |
|                 | 215.31                 | 5.7592          | 0.0209        | H-3->LUMO (79%)                                                 |
|                 | 211.53                 | 5.8619          | 0.0426        | H-1->L+1 (27%), HOMO->L+2 (19%)                                 |
|                 | 210.67                 | 5.8861          | 0.1959        | H-1->L+1 (13%), H-1->L+2 (18%), HOMO->L+3 (33%)                 |
|                 | 209.17                 | 5.9282          | 0.0004        | H-2->L+6 (20%), H-1->L+6 (58%), HOMO->L+6 (10%)                 |
|                 | 207.12                 | 5.9869          | <b>0.2264</b> | H-2->L+2 (18%), H-1->L+2 (15%), H-1->L+4 (18%), HOMO->L+4 (20%) |
|                 | 201.56                 | 6.1519          | 0.1905        | H-7->LUMO (40%), HOMO->L+3 (11%), HOMO->L+4 (11%)               |
|                 | 197.07                 | 6.2922          | 0.1918        | H-5->LUMO (20%), H-1->L+1 (12%), HOMO->L+5 (27%)                |
|                 | 195.44                 | 6.3447          | 0.0506        | H-7->LUMO (17%), H-5->LUMO (34%), HOMO->L+5 (18%)               |
|                 | 192.03                 | 6.4573          | 0.001         | H-6->LUMO (93%)                                                 |

|  |        |        |               |                                                                     |
|--|--------|--------|---------------|---------------------------------------------------------------------|
|  | 191.80 | 6.4650 | 0.3482        | H-7->LUMO (10%), H-5->LUMO (13%), H-5->L+1 (19%)                    |
|  | 190.15 | 6.5212 | 0.1647        | H-7->LUMO (11%), H-2->L+2 (21%), H-1->L+3 (16%)                     |
|  | 188.13 | 6.5911 | 0.0069        | H-2->L+1 (42%), H-1->L+1 (10%), H-1->L+2 (12%)                      |
|  | 187.45 | 6.6150 | 0.0113        | H-8->LUMO (13%), H-8->L+1 (21%), H-5->L+1 (14%)                     |
|  | 186.16 | 6.6609 | 0.0142        | H-8->L+1 (24%), H-5->L+1 (17%)                                      |
|  | 184.62 | 6.7164 | 0.2137        | H-9->LUMO (24%), H-2->L+4 (25%), H-1->L+4 (10%),<br>HOMO->L+4 (13%) |
|  | 183.21 | 6.7684 | 0.0004        | H-4->LUMO (91%)                                                     |
|  | 181.66 | 6.8259 | 0.0745        | H-9->LUMO (42%), H-2->L+4 (13%)                                     |
|  | 180.97 | 6.8520 | <b>0.3193</b> | H-3->L+3 (23%), H-3->L+5 (20%), HOMO->L+7 (19%)                     |
|  | 179.51 | 6.9078 | 0.0009        | H-2->L+6 (44%), HOMO->L+6 (44%)                                     |
|  | 175.61 | 7.0610 | 0.1083        | HOMO->L+7 (24%)                                                     |
|  | 175.52 | 7.0648 | 0.0076        | H-6->L+6 (88%)                                                      |

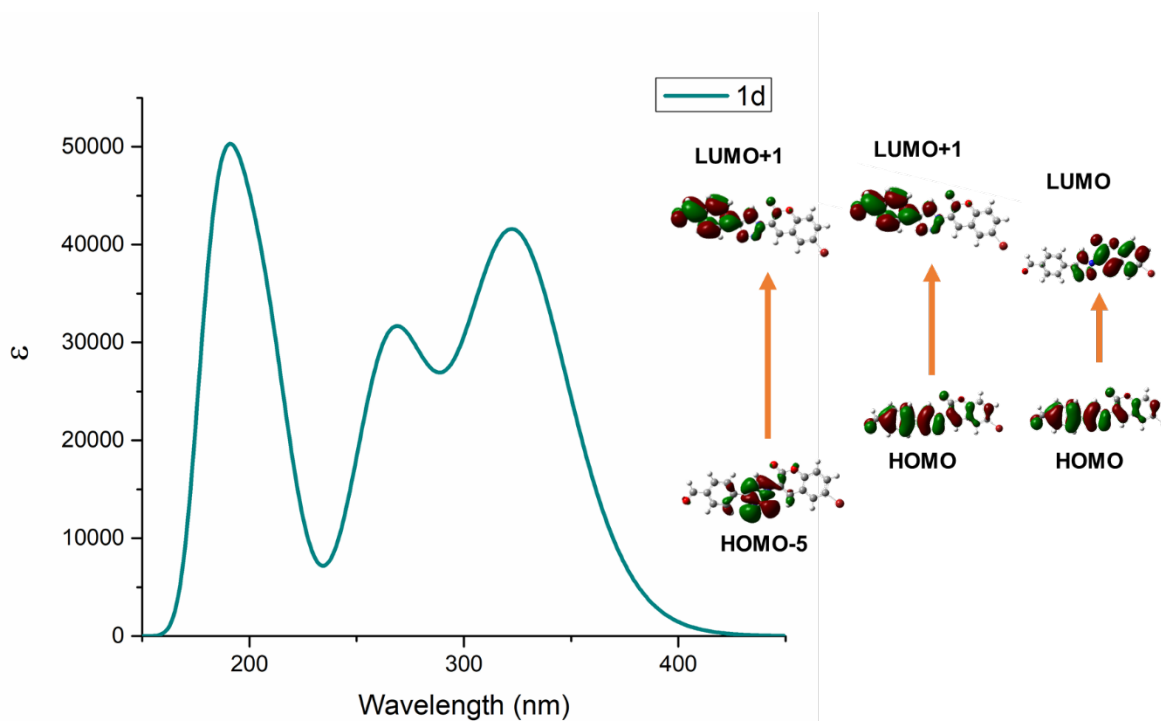

Molecular orbitals of the main electronic transitions calculated by TDDFT BhandHLYP/6-31G (d, p) and CPCM in dichloromethane.

**Table S3.12.** First thirty electronic transitions of **1e**, obtained by BhandHLYP/6-31G (d, p), CPCM solvent model (dichloromethane), oscillator strength and probable character of molecular orbital.

| <i>Molecule</i> | $\lambda_{ab}$<br>(nm) | E(tr)<br>(eV) | OS(f)         | MO/Character                                      |
|-----------------|------------------------|---------------|---------------|---------------------------------------------------|
| <b>1e</b>       | 317.59                 | 3.9044        | <b>1.0324</b> | H-1->LUMO (13%), HOMO->LUMO (81%)                 |
|                 | 298.07                 | 4.1601        | 0.0001        | H-4->L+1 (75%), H-4->L+6 (17%)                    |
|                 | 276.02                 | 4.4925        | 0.0937        | H-2->LUMO (11%), H-1->LUMO (57%), HOMO->L+1 (14%) |
|                 | 268.02                 | 4.6266        | <b>0.4613</b> | HOMO->L+1 (69%)                                   |

|        |        |               |                                                                                  |
|--------|--------|---------------|----------------------------------------------------------------------------------|
| 255.54 | 4.8525 | 0.2191        | H-3->LUMO (26%), H-2->LUMO (38%), H-1->LUMO (17%)                                |
| 249.36 | 4.9727 | 0.0317        | H-3->L+1 (41%), H-2->L+1 (27%)                                                   |
| 225.73 | 5.4933 | 0.0042        | H-8->LUMO (31%), H-6->LUMO (34%)                                                 |
| 221.35 | 5.6021 | 0.0031        | H-8->LUMO (35%), H-6->LUMO (22%)                                                 |
| 215.55 | 5.7528 | 0.086         | H-1->L+1 (14%), HOMO->L+2 (41%), HOMO->L+3 (11%)                                 |
| 213.29 | 5.8136 | 0.0285        | H-3->LUMO (56%), H-2->LUMO (32%)                                                 |
| 208.99 | 5.9333 | 0.0165        | H-1->L+1 (35%), HOMO->L+2 (15%)                                                  |
| 207.76 | 5.9684 | 0.1667        | H-1->L+1 (10%), H-1->L+2 (19%), HOMO->L+3 (37%)                                  |
| 204.56 | 6.0618 | <b>0.2561</b> | H-2->L+2 (15%), H-1->L+2 (15%), H-1->L+4 (16%), HOMO->L+4 (21%)                  |
| 199.45 | 6.2171 | <b>0.3052</b> | H-7->LUMO (35%), HOMO->L+3 (15%)                                                 |
| 194.45 | 6.3771 | 0.1739        | H-5->LUMO (26%), H-1->L+1 (10%), HOMO->L+5 (28%)                                 |
| 191.64 | 6.4704 | 0.0781        | H-7->LUMO (12%), H-5->LUMO (23%), H-5->L+1 (17%), HOMO->L+5 (21%)                |
| 188.27 | 6.5861 | 0.1395        | H-5->LUMO (26%), H-5->L+1 (12%), H-1->L+2 (11%)                                  |
| 187.31 | 6.6200 | 0.0024        | H-6->LUMO (20%), H-6->L+1 (53%), H-6->L+6 (10%)                                  |
| 185.69 | 6.6779 | <b>0.4569</b> | H-7->LUMO (24%), H-2->L+2 (16%), H-1->L+3 (16%), H-1->L+5 (10%)                  |
| 185.37 | 6.6894 | 0.0103        | H-3->L+1 (21%), H-2->L+1 (36%)                                                   |
| 184.40 | 6.7244 | 0.0035        | H-5->L+1 (28%)                                                                   |
| 183.79 | 6.7468 | 0.0009        | H-2->L+7 (18%), H-1->L+7 (54%), HOMO->L+7 (10%)                                  |
| 181.70 | 6.8243 | 0             | H-4->LUMO (93%)                                                                  |
| 181.54 | 6.8304 | 0.0985        | H-3->L+4 (14%), H-2->L+4 (28%), H-1->L+4 (13%), HOMO->L+2 (10%), HOMO->L+4 (15%) |
| 180.10 | 6.8850 | <b>0.3519</b> | H-3->L+3 (20%), H-2->L+3 (10%), HOMO->L+6 (23%)                                  |
| 174.01 | 7.1260 | 0.112         | H-5->L+1 (23%), HOMO->L+6 (40%)                                                  |
| 174.00 | 7.1263 | 0.0017        | H-15->LUMO (14%), H-8->L+2 (11%)                                                 |
| 172.50 | 7.1882 | 0.0834        | H-10->LUMO (65%)                                                                 |
| 171.47 | 7.2317 | 0.1671        | H-10->LUMO (12%), H-1->L+3 (17%)                                                 |
| 170.78 | 7.2607 | 0.0007        | H-13->LUMO (19%), H-9->LUMO (20%)                                                |



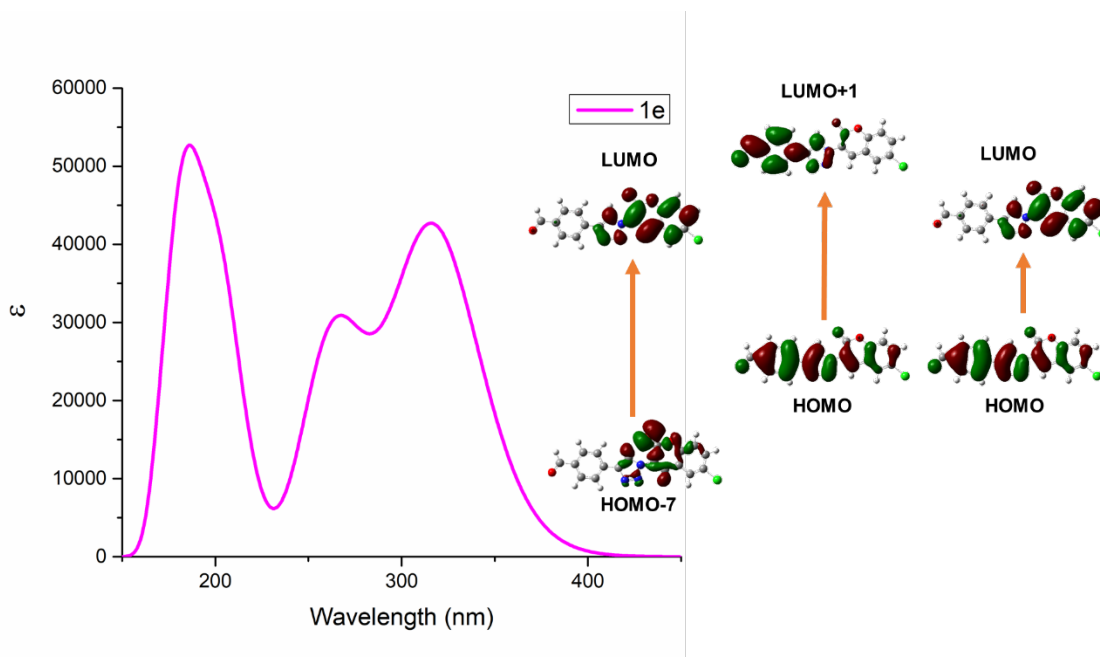

Molecular orbitals of the main electronic transitions calculated by TDDFT BhandHLYP/6-31G (d, p) and CPCM in dichloromethane.

**Table S3.13.** First thirty electronic transitions of **1f**, obtained by BhandHLYP/6-31G (d, p), CPCM solvent model (dichloromethane), oscillator strength and probable character of molecular orbital.

| <i>Molecule</i> | $\lambda_{ab}$<br>(nm) | $E(tr)$<br>(eV) | $OS(f)$       | <i>MO/Character</i>                              |
|-----------------|------------------------|-----------------|---------------|--------------------------------------------------|
| <b>1f</b>       | 312.43                 | 3.9689          | <b>1.0845</b> | H-2->LUMO (11%), HOMO->LUMO (81%)                |
|                 | 297.96                 | 4.1616          | 0.0001        | H-4->L+1 (73%), H-4->L+6 (17%)                   |
|                 | 297.51                 | 4.1679          | 0.0473        | H-1->LUMO (88%)                                  |
|                 | 270.69                 | 4.5809          | <b>0.4209</b> | H-2->LUMO (10%), HOMO->L+1 (75%)                 |
|                 | 256.76                 | 4.8294          | 0.199         | H-2->LUMO (66%), HOMO->LUMO (10%)                |
|                 | 249.08                 | 4.9782          | 0.0314        | H-3->L+1 (65%)                                   |
|                 | 223.58                 | 5.5462          | 0.004         | H-8->LUMO (33%), H-8->L+2 (10%), H-7->LUMO (29%) |
|                 | 219.33                 | 5.6536          | 0.0039        | H-8->LUMO (30%), H-7->LUMO (23%)                 |
|                 | 218.50                 | 5.6751          | 0.2132        | H-1->L+2 (16%), H-1->L+3 (12%), HOMO->L+2 (30%)  |
|                 | 214.19                 | 5.7892          | 0.178         | H-2->L+1 (38%), H-1->L+2 (19%)                   |
|                 | 209.71                 | 5.9129          | 0.0114        | H-2->L+1 (15%), H-1->L+1 (25%), HOMO->L+2 (26%)  |
|                 | 208.03                 | 5.9606          | 0.0258        | H-3->LUMO (76%)                                  |
|                 | 207.02                 | 5.9898          | 0.0029        | H-1->L+1 (54%)                                   |
|                 | 202.77                 | 6.1154          | 0.095         | H-2->L+2 (20%), H-1->L+5 (11%), HOMO->L+3 (31%)  |
|                 | 199.64                 | 6.2112          | 0.1172        | H-6->LUMO (48%), H-1->L+5 (19%)                  |
|                 | 194.34                 | 6.3804          | <b>0.2877</b> | H-6->LUMO (13%), H-3->L+1 (11%), HOMO->L+4 (43%) |
|                 | 190.92                 | 6.4947          | 0.015         | H-5->LUMO (39%), H-5->L+1 (28%)                  |
|                 | 187.21                 | 6.6235          | 0.0019        | H-7->LUMO (24%), H-7->L+1 (52%)                  |
|                 | 186.31                 | 6.6555          | 0.163         | H-5->LUMO (26%), H-5->L+1 (16%), H-2->L+2 (19%)  |
|                 | 185.63                 | 6.6800          | <b>0.3566</b> | H-2->L+2 (26%), H-2->L+4 (15%)                   |

|  |        |        |               |                                                                 |
|--|--------|--------|---------------|-----------------------------------------------------------------|
|  | 184.18 | 6.7326 | <b>0.3027</b> | H-1->L+5 (39%)                                                  |
|  | 181.92 | 6.8162 | 0.0093        | H-3->L+3 (11%), H-1->L+2 (13%), HOMO->L+5 (28%)                 |
|  | 179.55 | 6.9063 | 0.3143        | H-3->L+3 (22%), HOMO->L+6 (17%)                                 |
|  | 177.36 | 6.9913 | 0             | H-4->LUMO (92%)                                                 |
|  | 176.16 | 7.0392 | 0.2433        | H-1->L+2 (16%), H-1->L+3 (28%), H-1->L+4 (25%), HOMO->L+5 (14%) |
|  | 173.91 | 7.1303 | 0.12          | H-5->L+1 (19%), HOMO->L+6 (42%)                                 |
|  | 173.13 | 7.1622 | 0.0006        | H-8->LUMO (13%), H-8->L+2 (19%)                                 |
|  | 169.54 | 7.3137 | 0.0019        | H-13->LUMO (21%)                                                |
|  | 169.23 | 7.3272 | 0.1744        | H-2->L+3 (40%), H-2->L+4 (10%)                                  |
|  | 167.44 | 7.4055 | 0.0162        | H-10->LUMO (14%), H-9->LUMO (63%)                               |

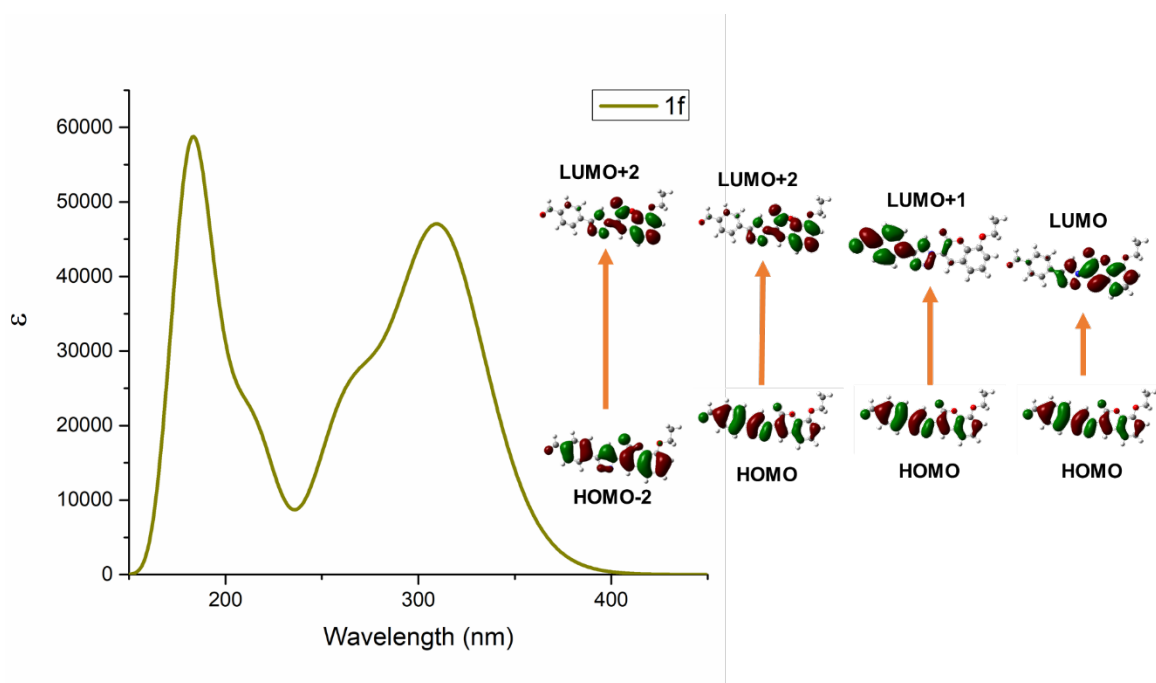

Molecular orbitals of the main electronic transitions calculated by TDDFT BhandHLYP/6-31G (d, p) and CPCM in dichloromethane.

**Table S3.14.** First thirty electronic transitions of **1g**, obtained by BhandHLYP/6-31G (d, p), CPCM solvent model (dichloromethane), oscillator strength and probable character of molecular orbital.

| <i>Molecule</i> | $\lambda_{ab}$<br>(nm) | $E(tr)$<br>(eV) | $OS(f)$       | <i>MO/Character</i>                              |
|-----------------|------------------------|-----------------|---------------|--------------------------------------------------|
| <b>1g</b>       | 322.90                 | 3.8402          | <b>1.176</b>  | HOMO->LUMO (90%)                                 |
|                 | 297.80                 | 4.1638          | 0.0001        | H-4->L+1 (73%), H-4->L+6 (17%)                   |
|                 | 273.76                 | 4.5295          | <b>0.4499</b> | H-1->LUMO (13%), H-1->L+1 (20%), HOMO->L+1 (61%) |
|                 | 259.35                 | 4.7811          | 0.0913        | H-2->LUMO (30%), H-1->LUMO (34%)                 |
|                 | 254.31                 | 4.8760          | 0.0819        | H-2->LUMO (34%), H-1->LUMO (34%)                 |
|                 | 248.90                 | 4.9818          | 0.03          | H-3->L+1 (56%)                                   |
|                 | 225.08                 | 5.5092          | 0.0461        | H-1->L+1 (43%), HOMO->L+1 (21%), HOMO->L+2 (15%) |
|                 | 221.18                 | 5.6062          | 0.0037        | H-8->LUMO (35%), H-7->LUMO (25%)                 |

|        |        |               |                                                                                       |
|--------|--------|---------------|---------------------------------------------------------------------------------------|
| 219.08 | 5.6600 | 0.1129        | H-2->LUMO (11%), H-1->L+1 (13%), HOMO->L+2 (46%)                                      |
| 217.35 | 5.7051 | 0.0045        | H-8->LUMO (26%), H-7->LUMO (22%), H-7->L+2 (10%)                                      |
| 211.83 | 5.8537 | 0.0297        | HOMO->L+3 (38%), HOMO->L+4 (25%)                                                      |
| 205.29 | 6.0403 | 0.0766        | H-3->LUMO (68%), H-2->LUMO (10%)                                                      |
| 201.32 | 6.1593 | 0.1148        | H-3->L+1 (11%), HOMO->L+4 (22%), HOMO->L+5 (13%)                                      |
| 198.96 | 6.2323 | 0.13          | H-6->LUMO (12%), H-5->LUMO (34%), H-2->L+2 (12%),<br>HOMO->L+5 (12%)                  |
| 195.66 | 6.3375 | 0.2391        | H-6->LUMO (12%), H-5->LUMO (12%), H-1->L+3 (11%),<br>HOMO->L+4 (12%), HOMO->L+5 (24%) |
| 191.34 | 6.4805 | 0.0294        | H-6->LUMO (12%), H-6->L+1 (27%), H-5->LUMO (14%)                                      |
| 189.26 | 6.5517 | 0.1384        | H-1->L+2 (32%), H-1->L+4 (14%), HOMO->L+3 (11%)                                       |
| 187.17 | 6.6250 | 0.0016        | H-7->LUMO (27%), H-7->L+1 (51%)                                                       |
| 184.57 | 6.7184 | <b>0.3904</b> | H-6->LUMO (29%), H-5->LUMO (18%), H-2->L+1 (13%)                                      |
| 183.67 | 6.7511 | 0.0055        | H-2->L+1 (55%)                                                                        |
| 181.05 | 6.8491 | 0.0002        | H-3->L+2 (12%), H-3->L+3 (14%), H-2->L+3 (13%), H-1->L+6<br>(10%), HOMO->L+6 (14%)    |
| 179.48 | 6.9088 | <b>0.7949</b> | H-3->L+3 (15%), H-2->L+2 (27%), HOMO->L+5 (13%)                                       |
| 175.68 | 7.0582 | 0.0595        | H-2->L+4 (15%), H-2->L+5 (16%), H-1->L+3 (10%)                                        |
| 175.19 | 7.0782 | 0             | H-4->LUMO (91%)                                                                       |
| 174.78 | 7.0945 | 0.1174        | H-6->L+1 (24%), H-3->L+3 (11%), HOMO->L+6 (32%)                                       |
| 172.00 | 7.2091 | 0.0008        | H-11->LUMO (10%), H-8->L+2 (12%)                                                      |
| 170.58 | 7.2692 | 0.055         | H-2->L+4 (11%), H-1->L+3 (40%)                                                        |
| 168.68 | 7.3510 | 0.0019        | H-13->LUMO (10%), H-11->LUMO (14%), H-7->LUMO<br>(11%)                                |
| 168.61 | 7.3543 | 0.2531        | H-2->L+4 (13%), H-1->L+4 (25%), H-1->L+5 (10%), HOMO-<br>>L+3 (10%)                   |
| 168.21 | 7.3719 | 0.0237        | H-9->LUMO (38%), H-5->L+1 (30%)                                                       |

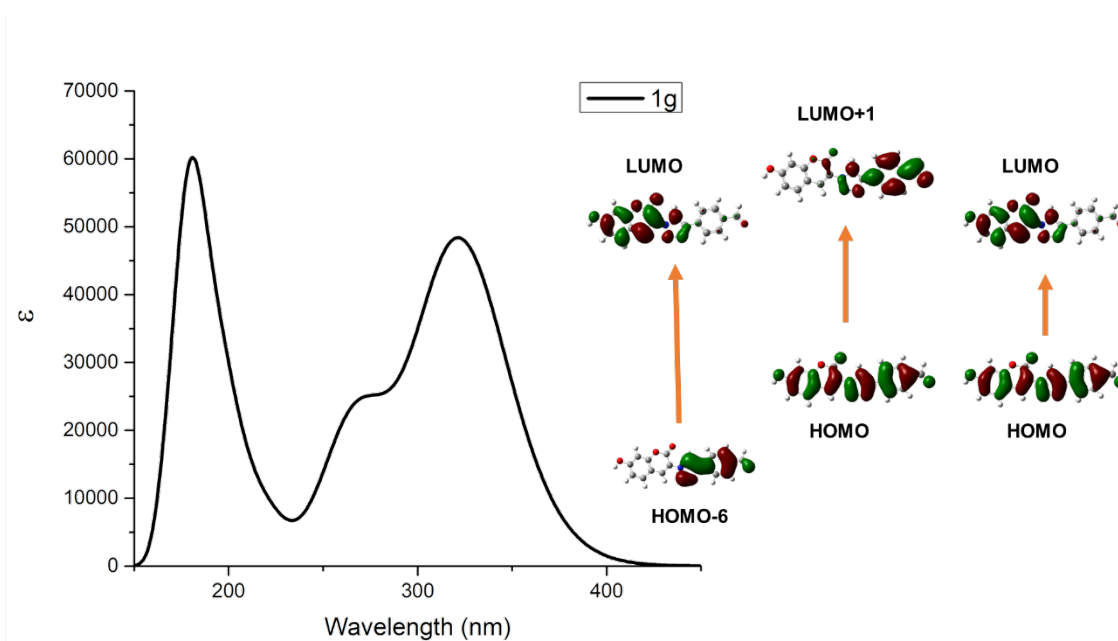

Molecular orbitals of the main electronic transitions calculated by TDDFT BhandHLYP/6-31G (d, p) and CPCM in dichloromethane.

**Table S4.** Resistivity values of TCs **1a-g**.

| FPhTC     | Resistivity/ $10^4$ ( $\Omega\text{cm}$ ) |
|-----------|-------------------------------------------|
| <b>1a</b> | 9.91( $\pm 0.05$ )                        |
| <b>1b</b> | 0.553( $\pm 0.080$ )                      |
| <b>1c</b> | 1.82( $\pm 0.003$ )                       |
| <b>1d</b> | 9.41( $\pm 0.10$ )                        |
| <b>1e</b> | 10.6( $\pm 0.10$ )                        |
| <b>1f</b> | 9.11( $\pm 0.08$ )                        |
| <b>1g</b> | 2.07( $\pm 0.03$ )                        |

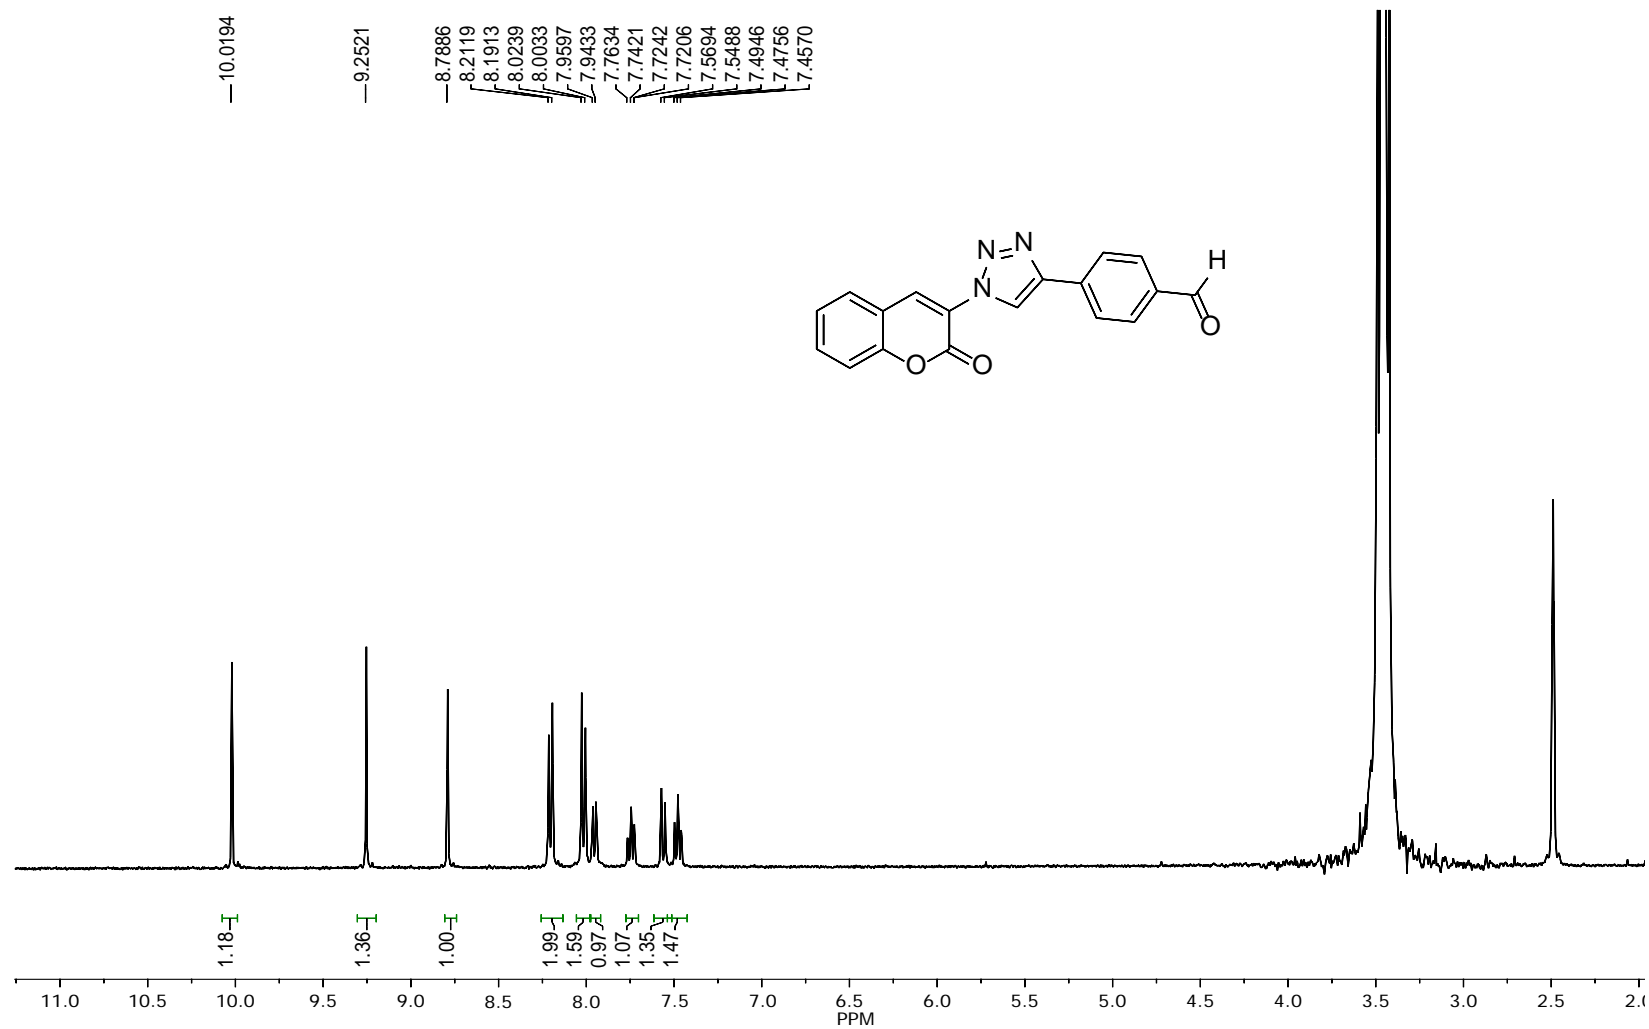

**Figure S1.** <sup>1</sup>H NMR (DMSO-*d*<sub>6</sub>, 400 MHz) spectrum of **1a**

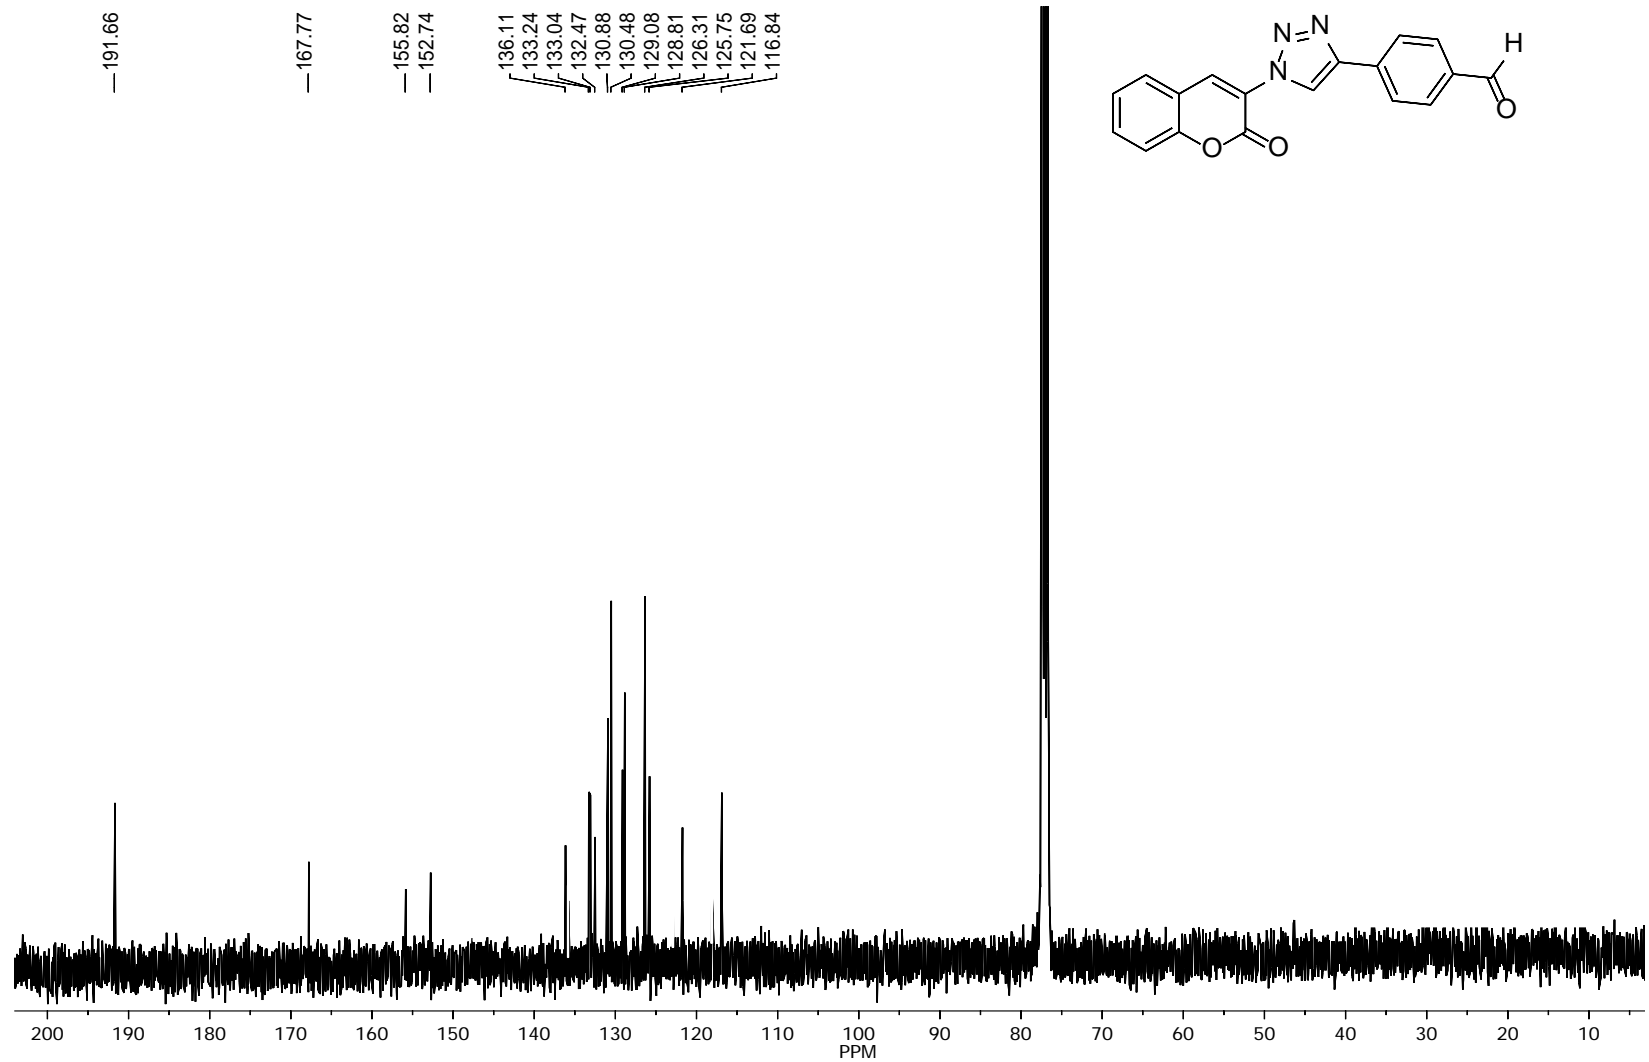

Figure S2. <sup>13</sup>C NMR (CDCl<sub>3</sub>, 100.6 MHz) spectrum of **1a**.

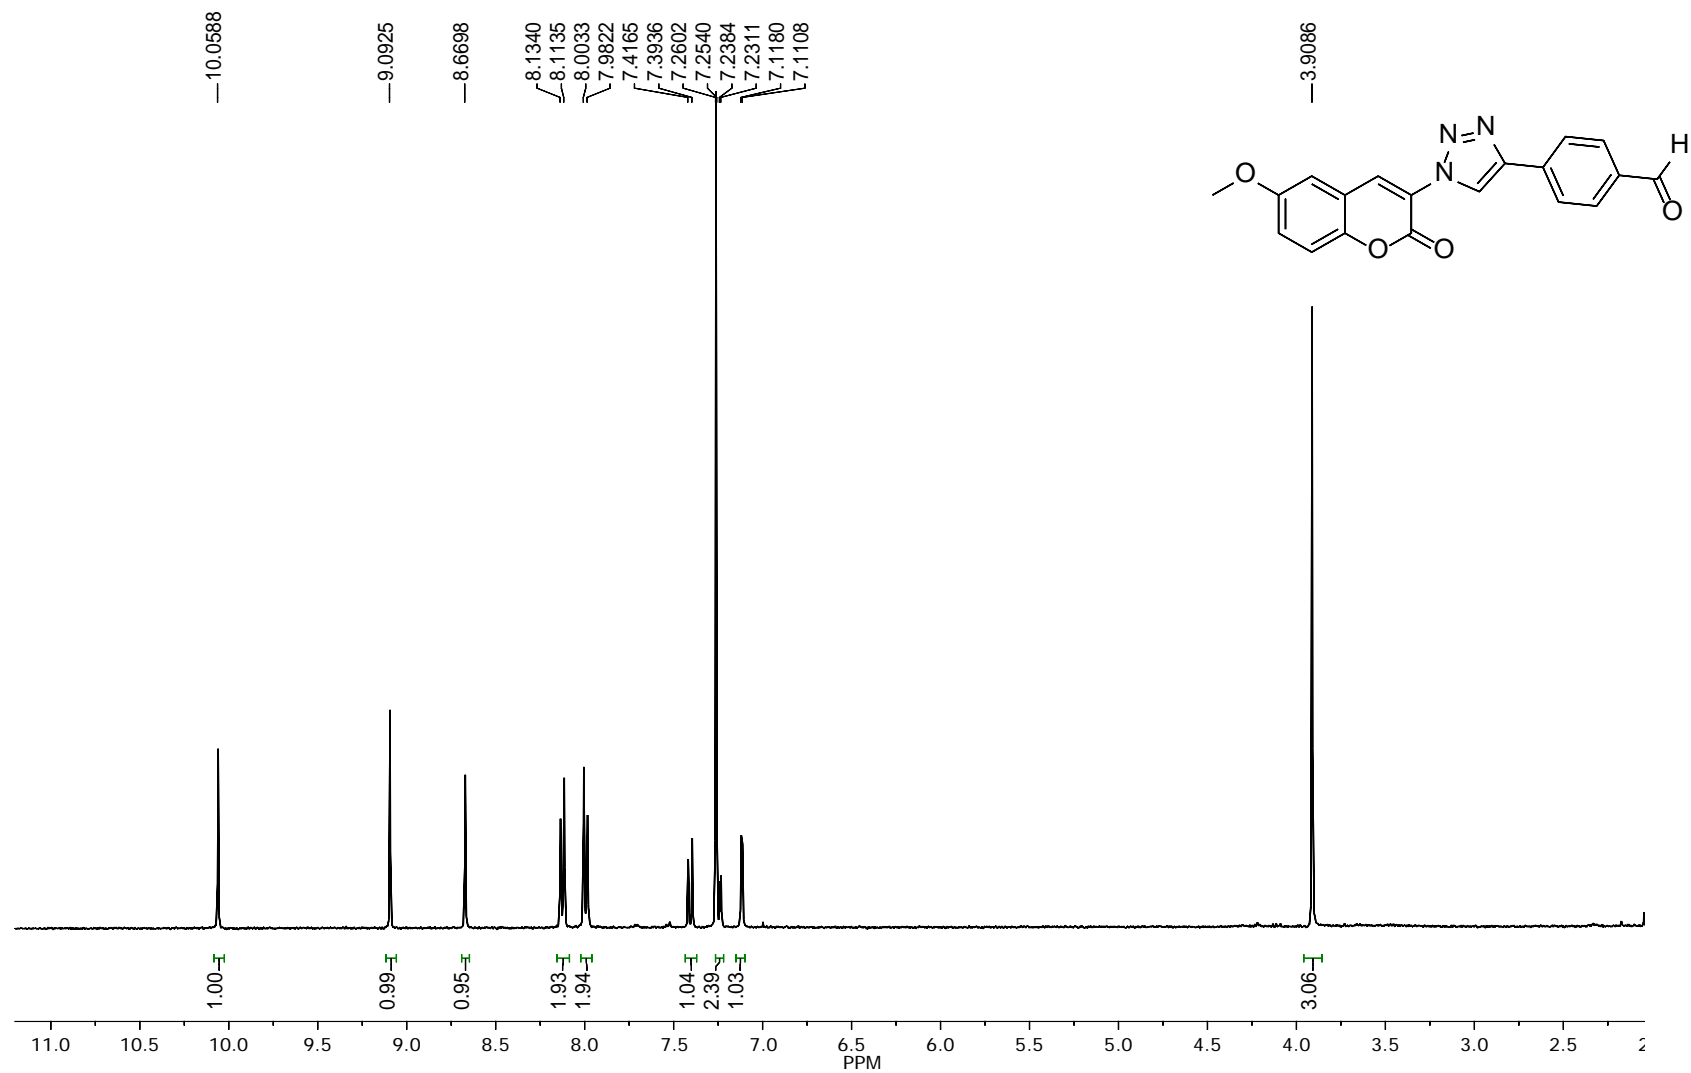

Figure S3.  $^1\text{H}$  NMR ( $\text{CDCl}_3$ , 400 MHz) spectrum of **1b**.

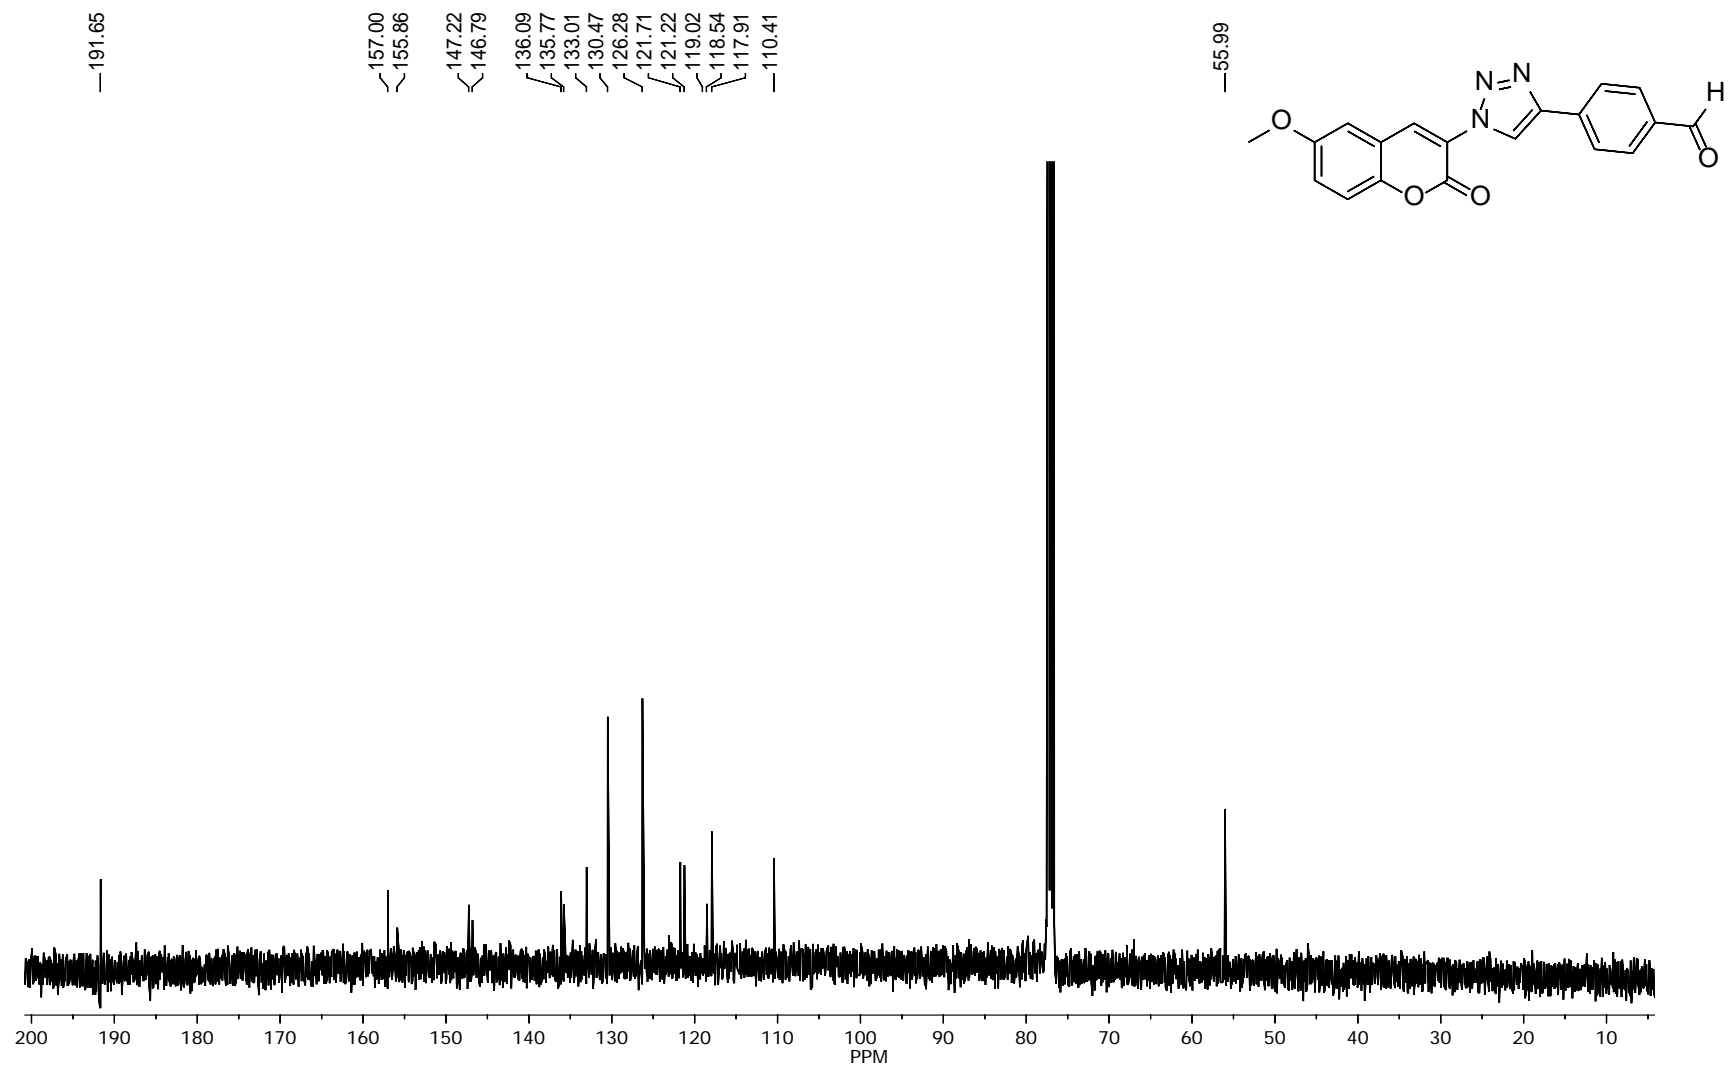

Figure S4. <sup>13</sup>C NMR (CDCl<sub>3</sub>, 100.6 MHz) spectrum of **1b**.



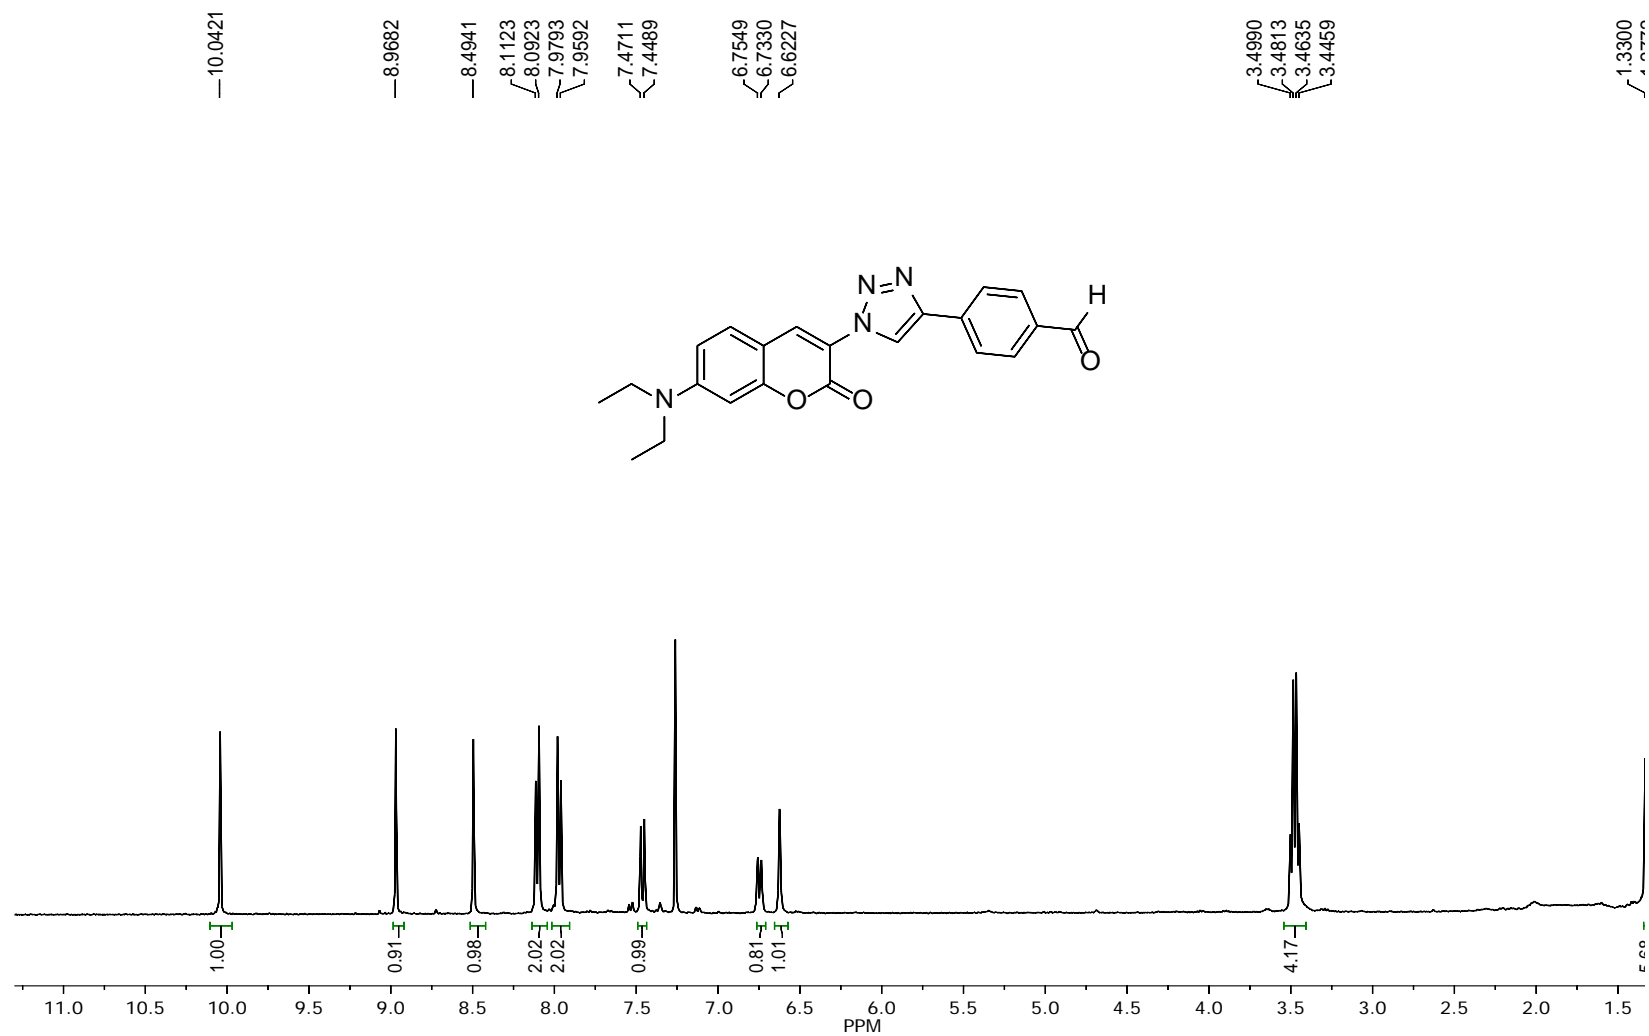

Figure S5.  $^1\text{H}$  NMR ( $\text{CDCl}_3$ , 400 MHz) spectrum of **1c**.

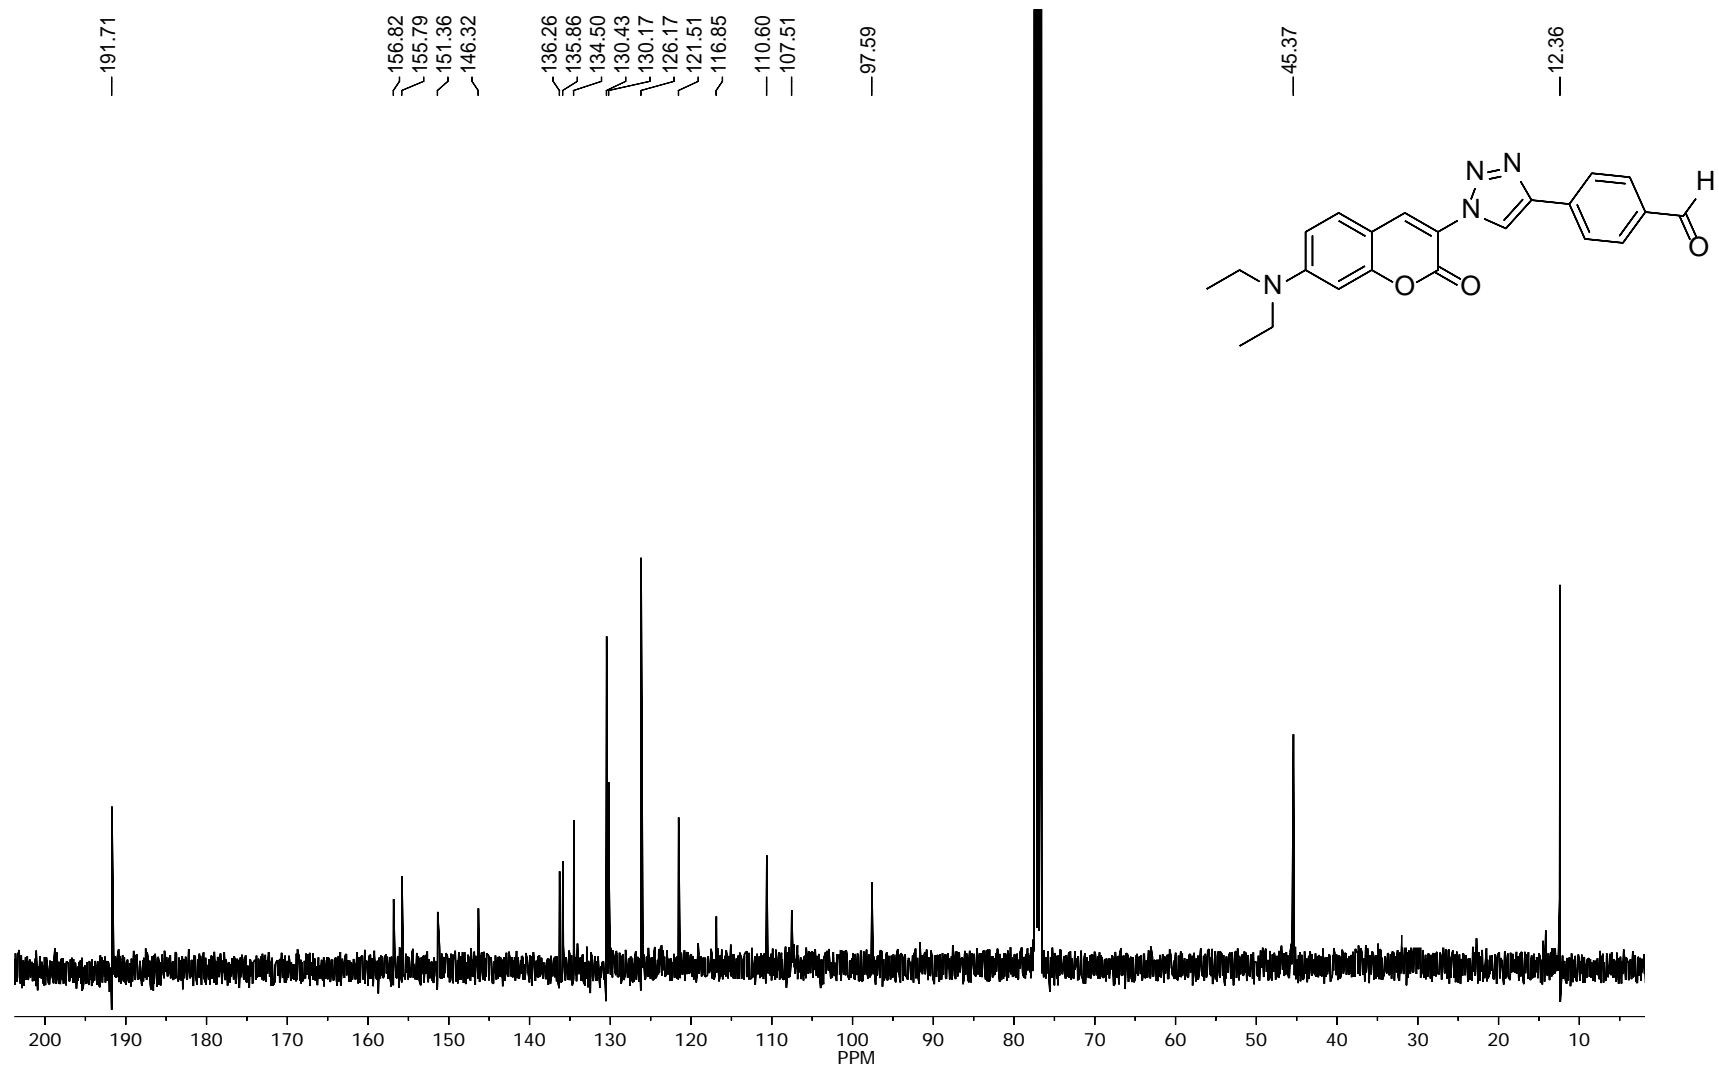

**Figure S6.** <sup>13</sup>C NMR (CDCl<sub>3</sub>, 100.6 MHz) spectrum of **1c**.

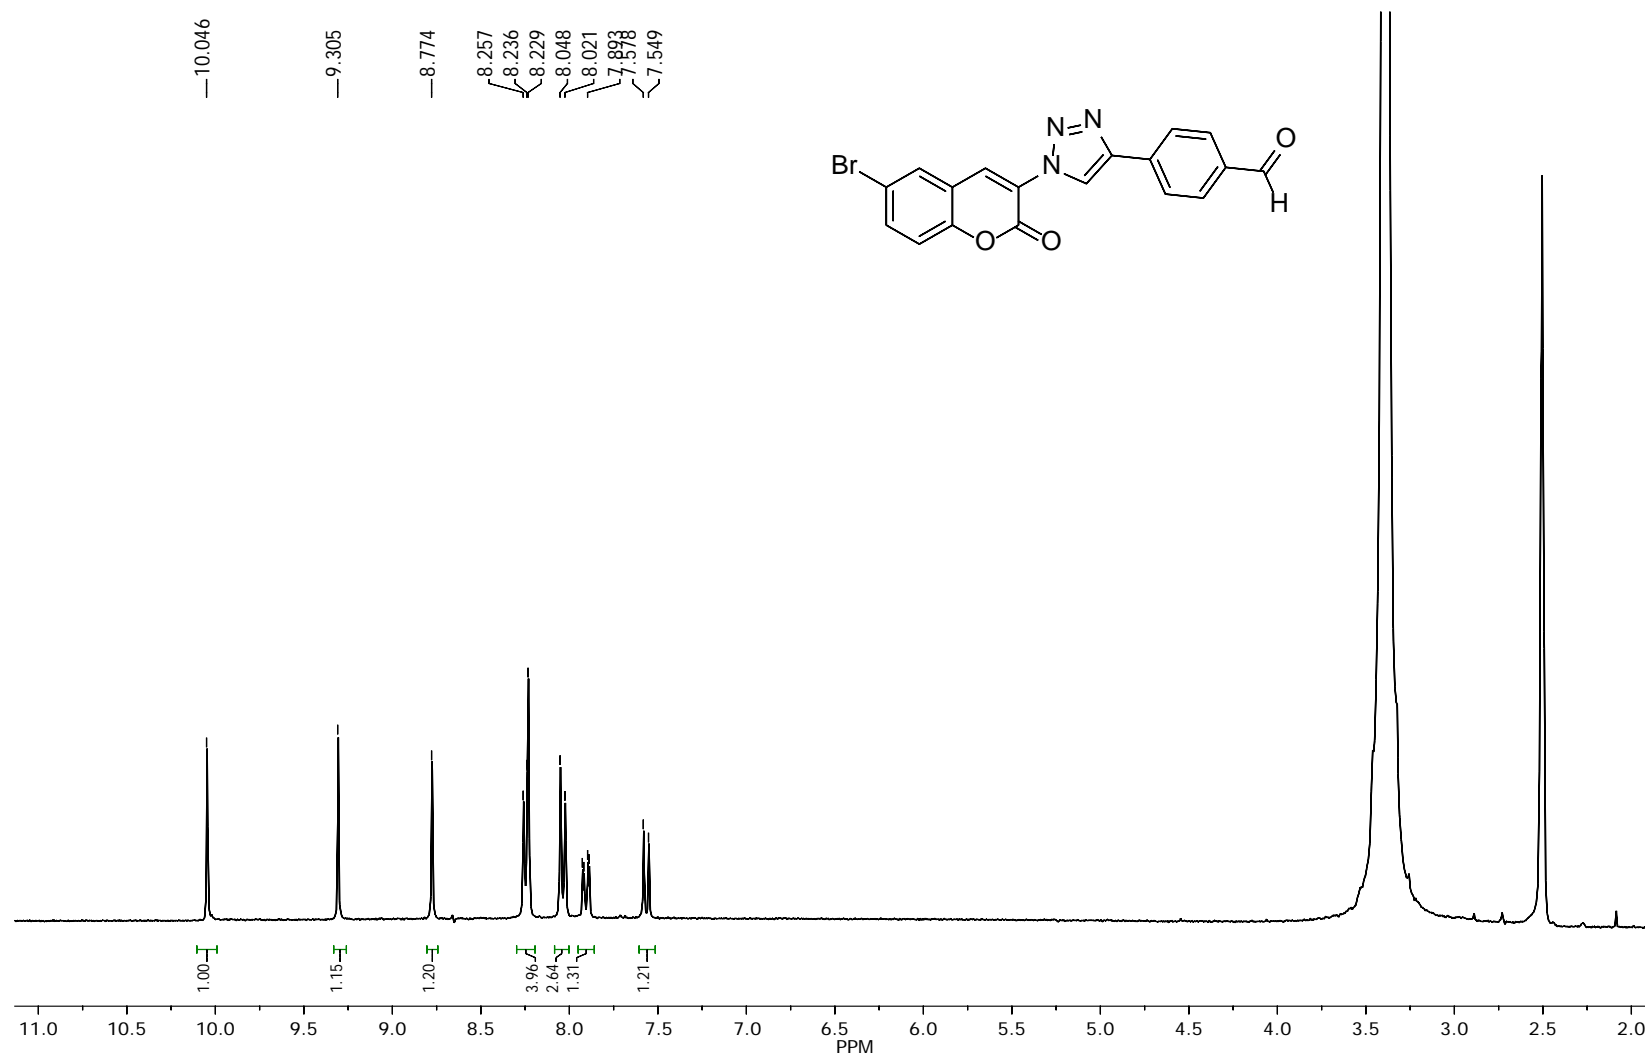

**Figure S7.** <sup>1</sup>H NMR (DMSO-*d*<sub>6</sub>, 300 MHz) spectrum of **1d**.

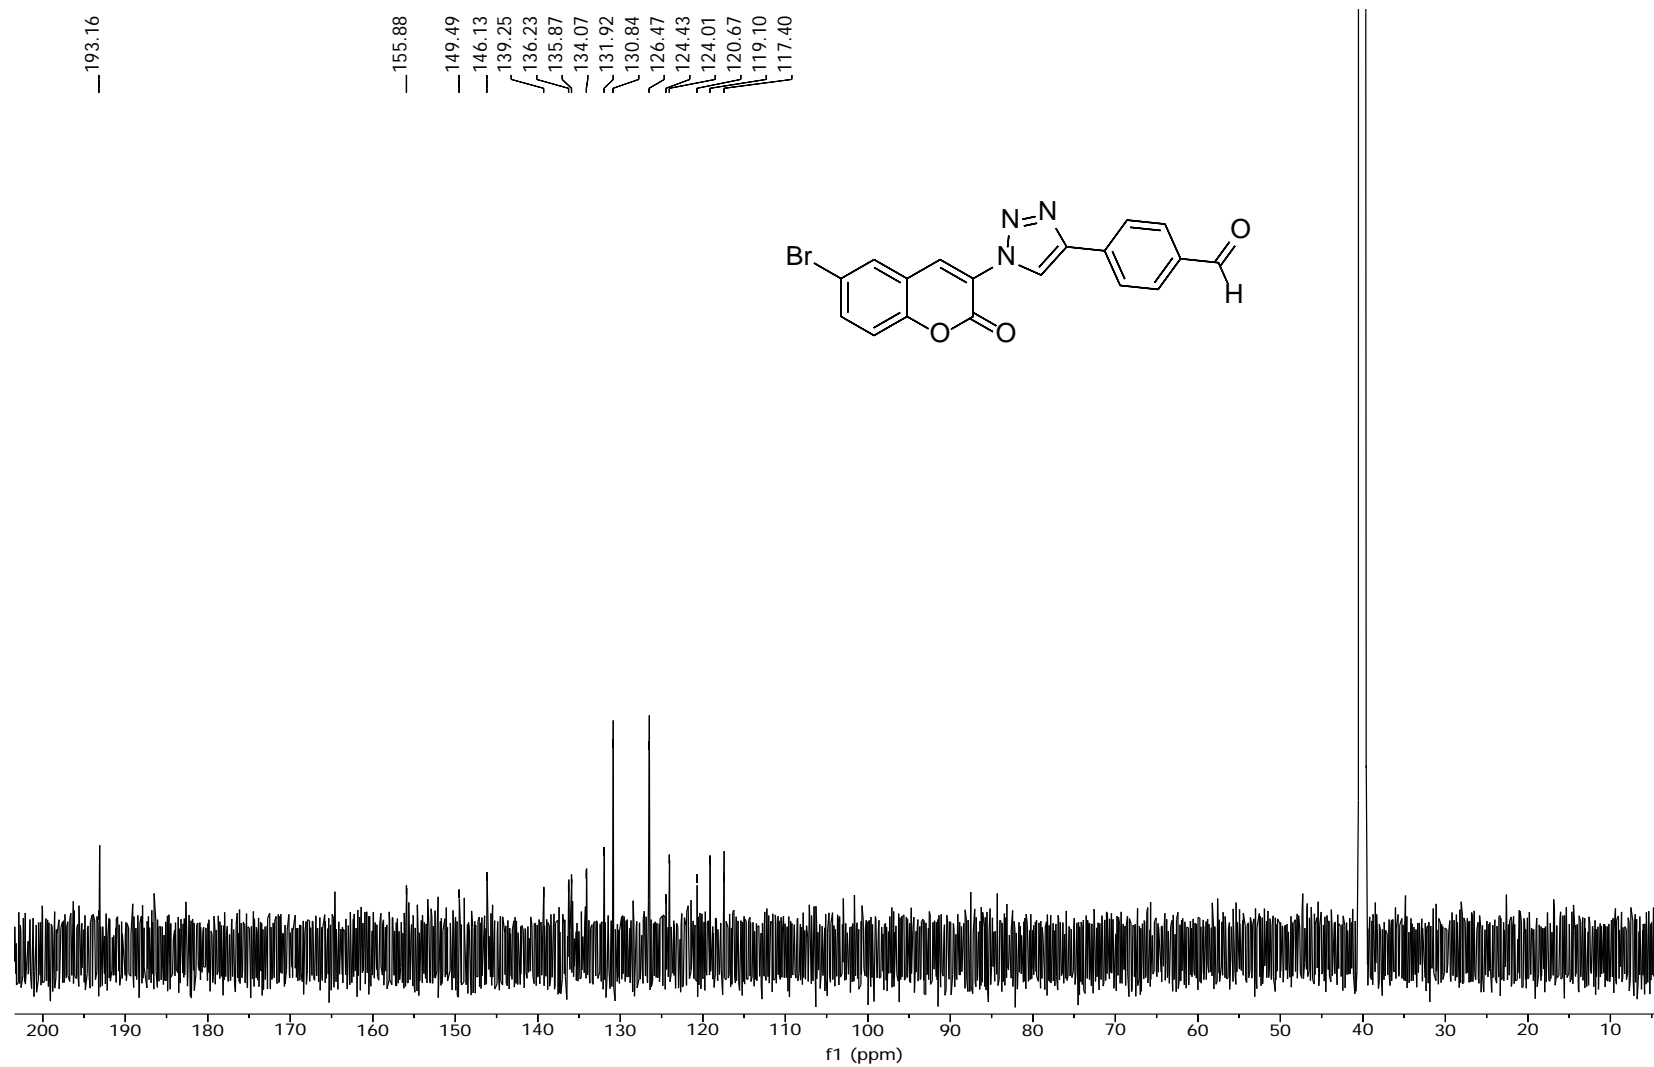

**Figure S8.** <sup>13</sup>C NMR (DMSO-*d*<sub>6</sub>, 75.4 MHz) spectrum of **1d**.

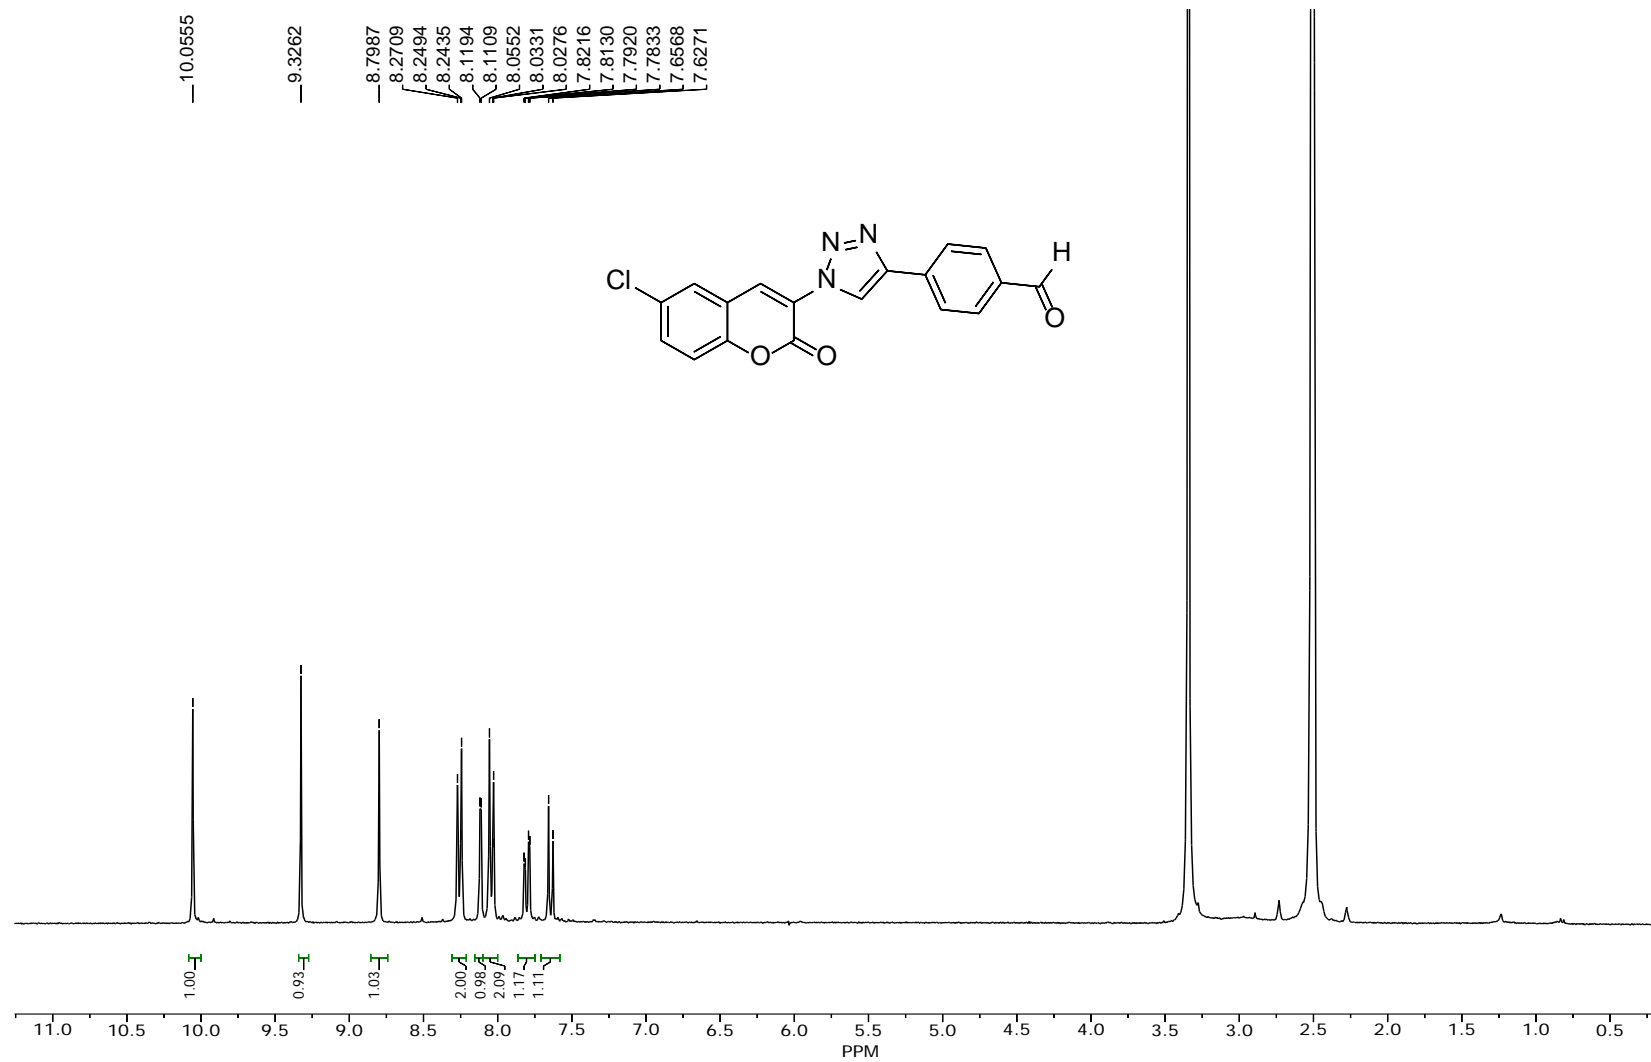

**Figure S9.** <sup>1</sup>H NMR (DMSO-*d*<sub>6</sub>, 300 MHz) spectrum of **1e**.

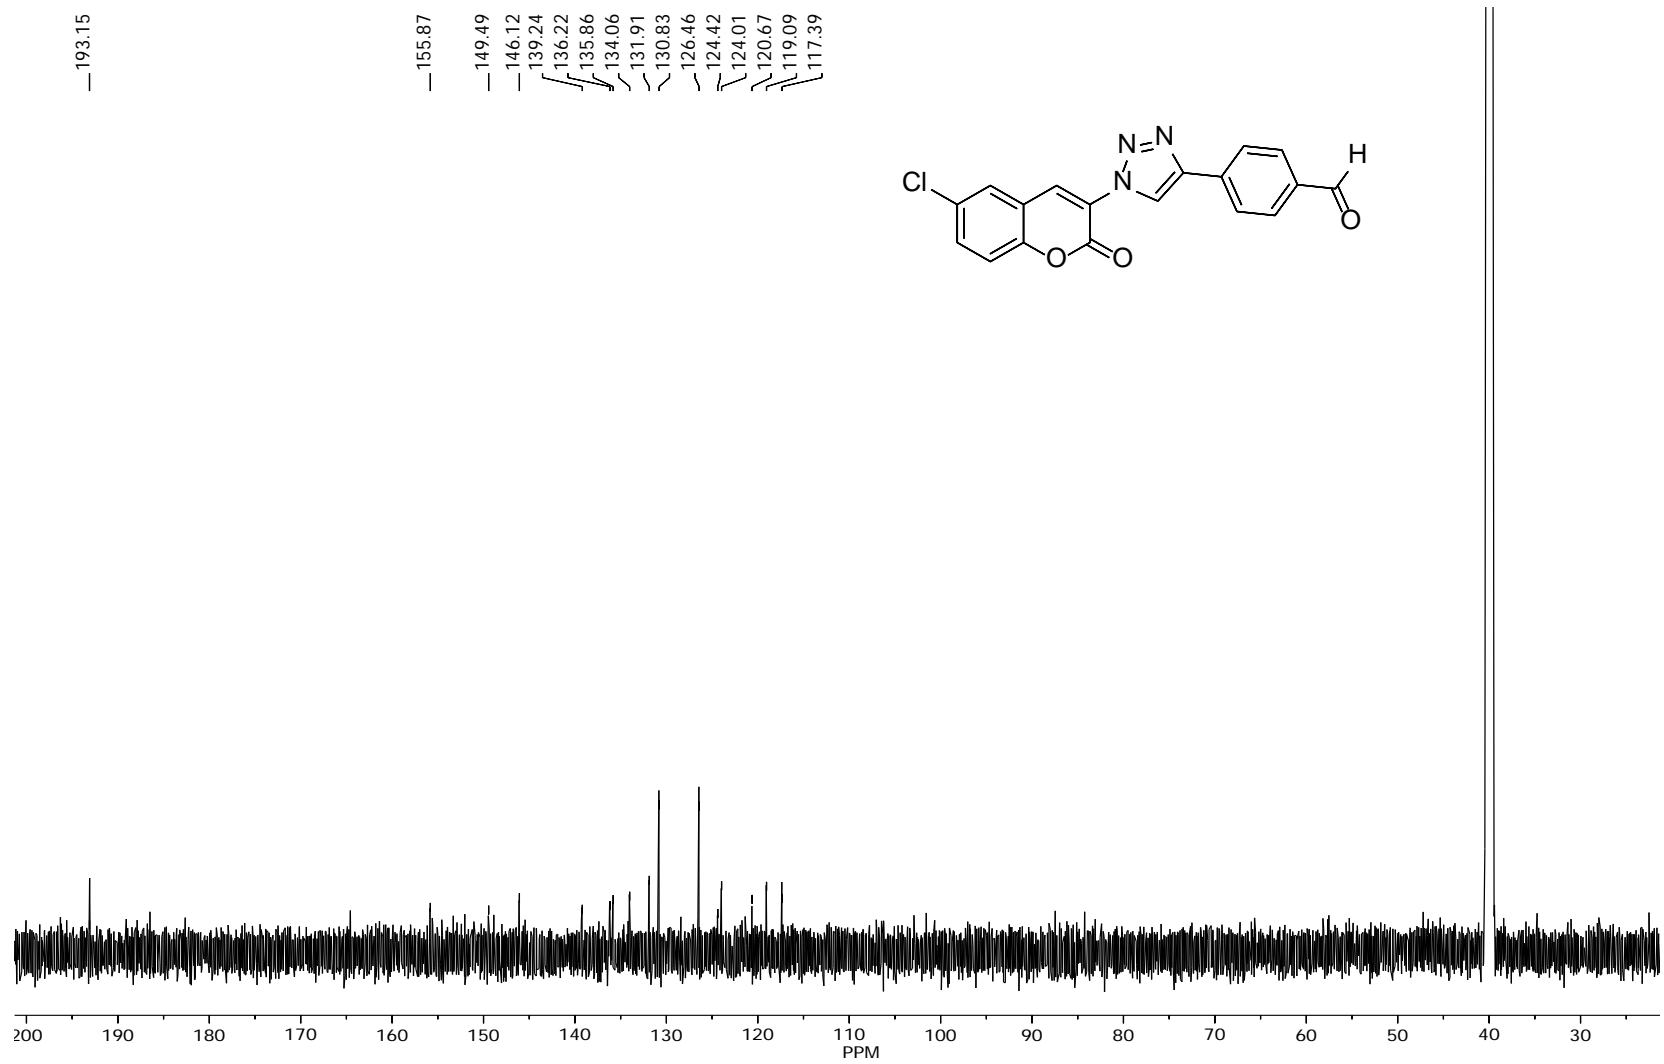

Figure S10. <sup>13</sup>C NMR (DMSO-*d*<sub>6</sub>, 75.4 MHz) spectrum of **1e**.

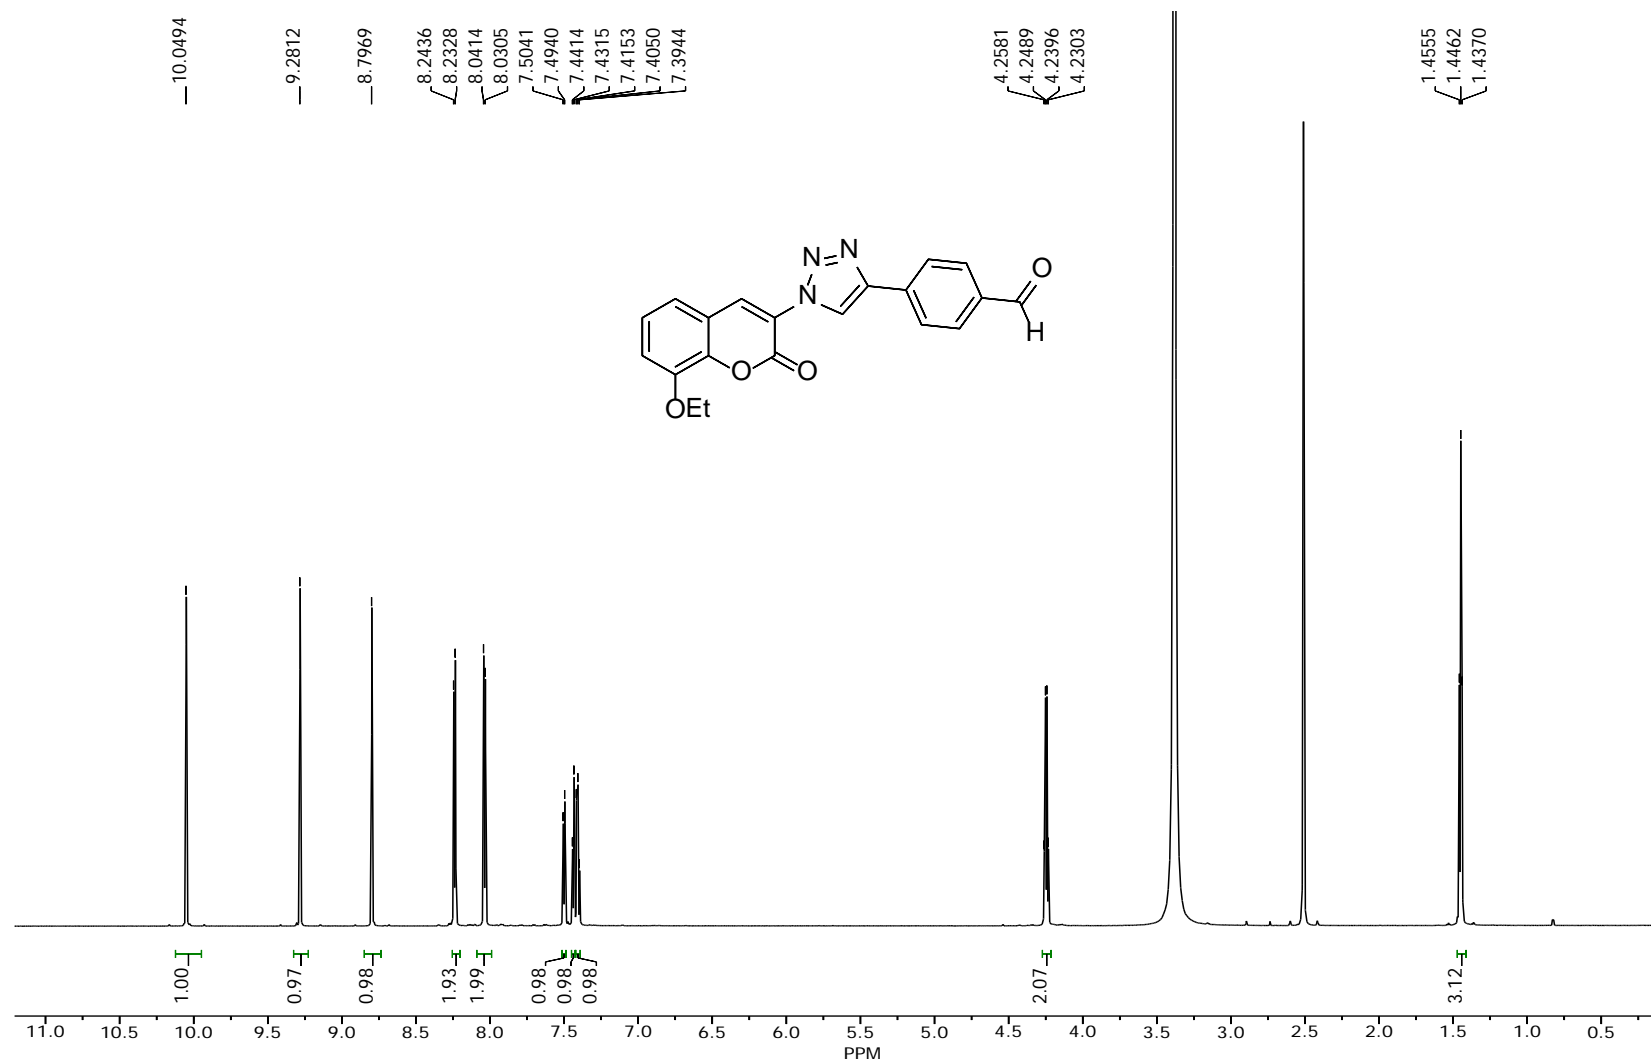

**Figure S11.** <sup>1</sup>H NMR (DMSO-*d*<sub>6</sub>, 750 MHz) spectrum of **1f**.

19014 JCP IPN86

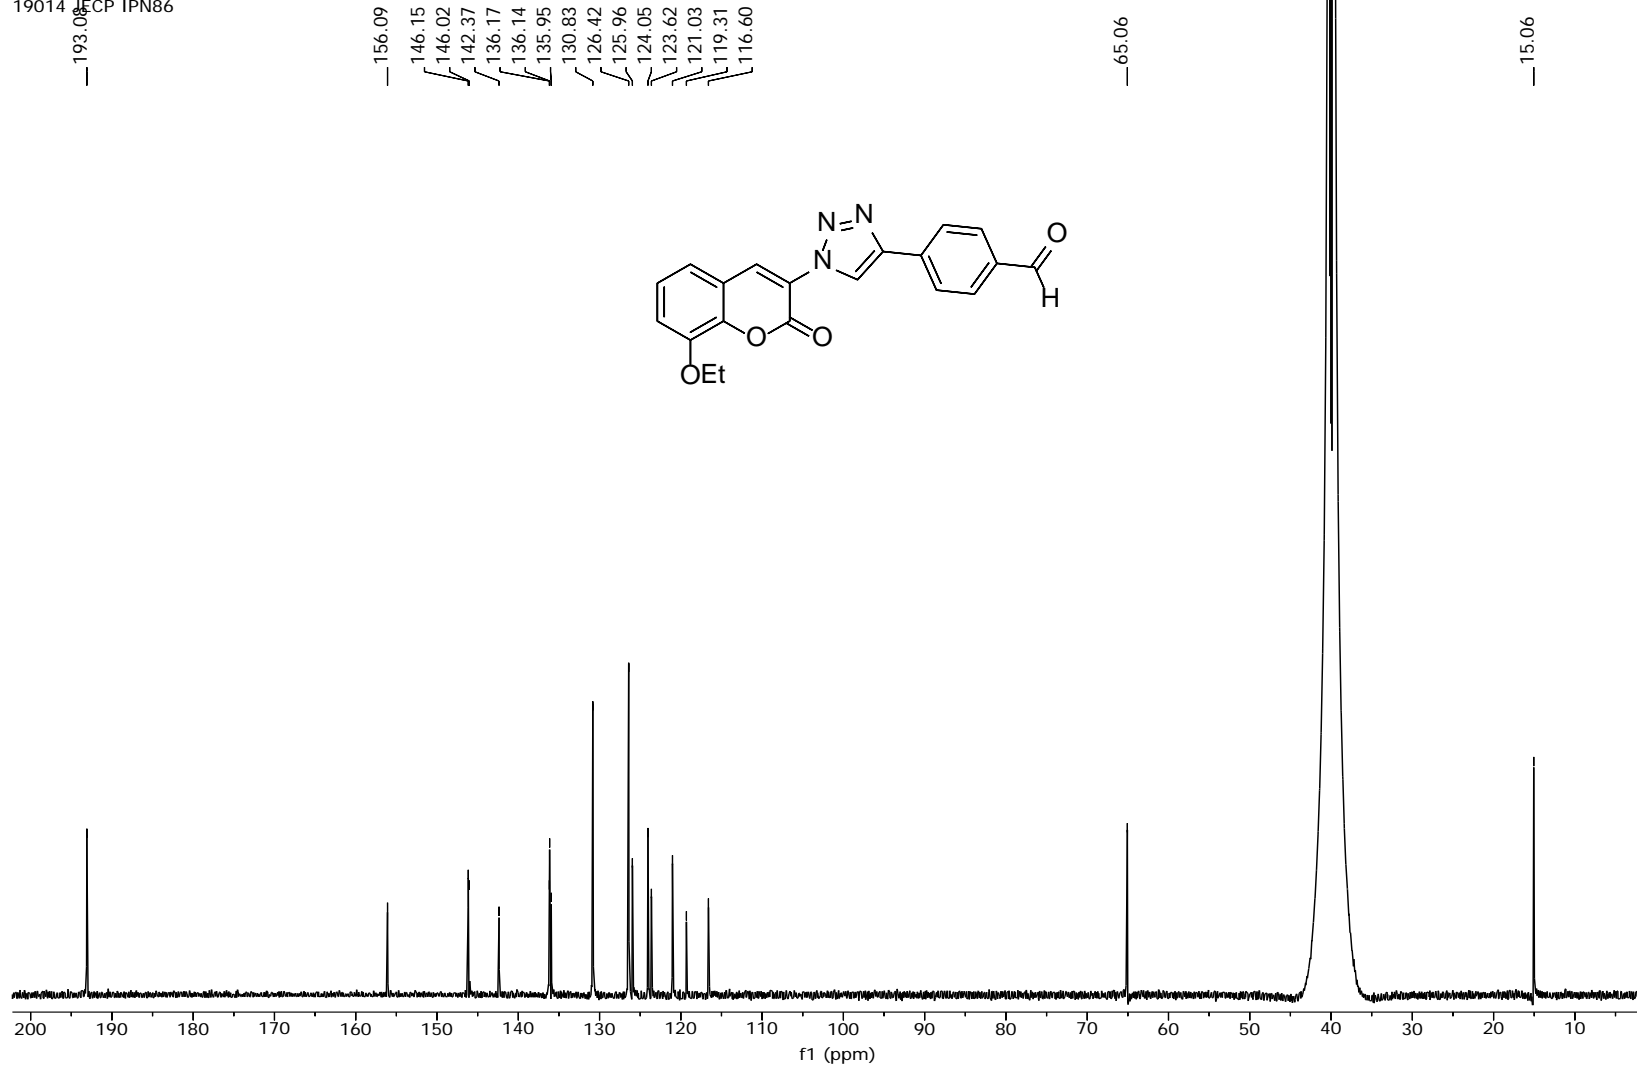

Figure S12. <sup>13</sup>C NMR (DMSO-*d*<sub>6</sub>, 188.6 MHz) spectrum of **1f**.



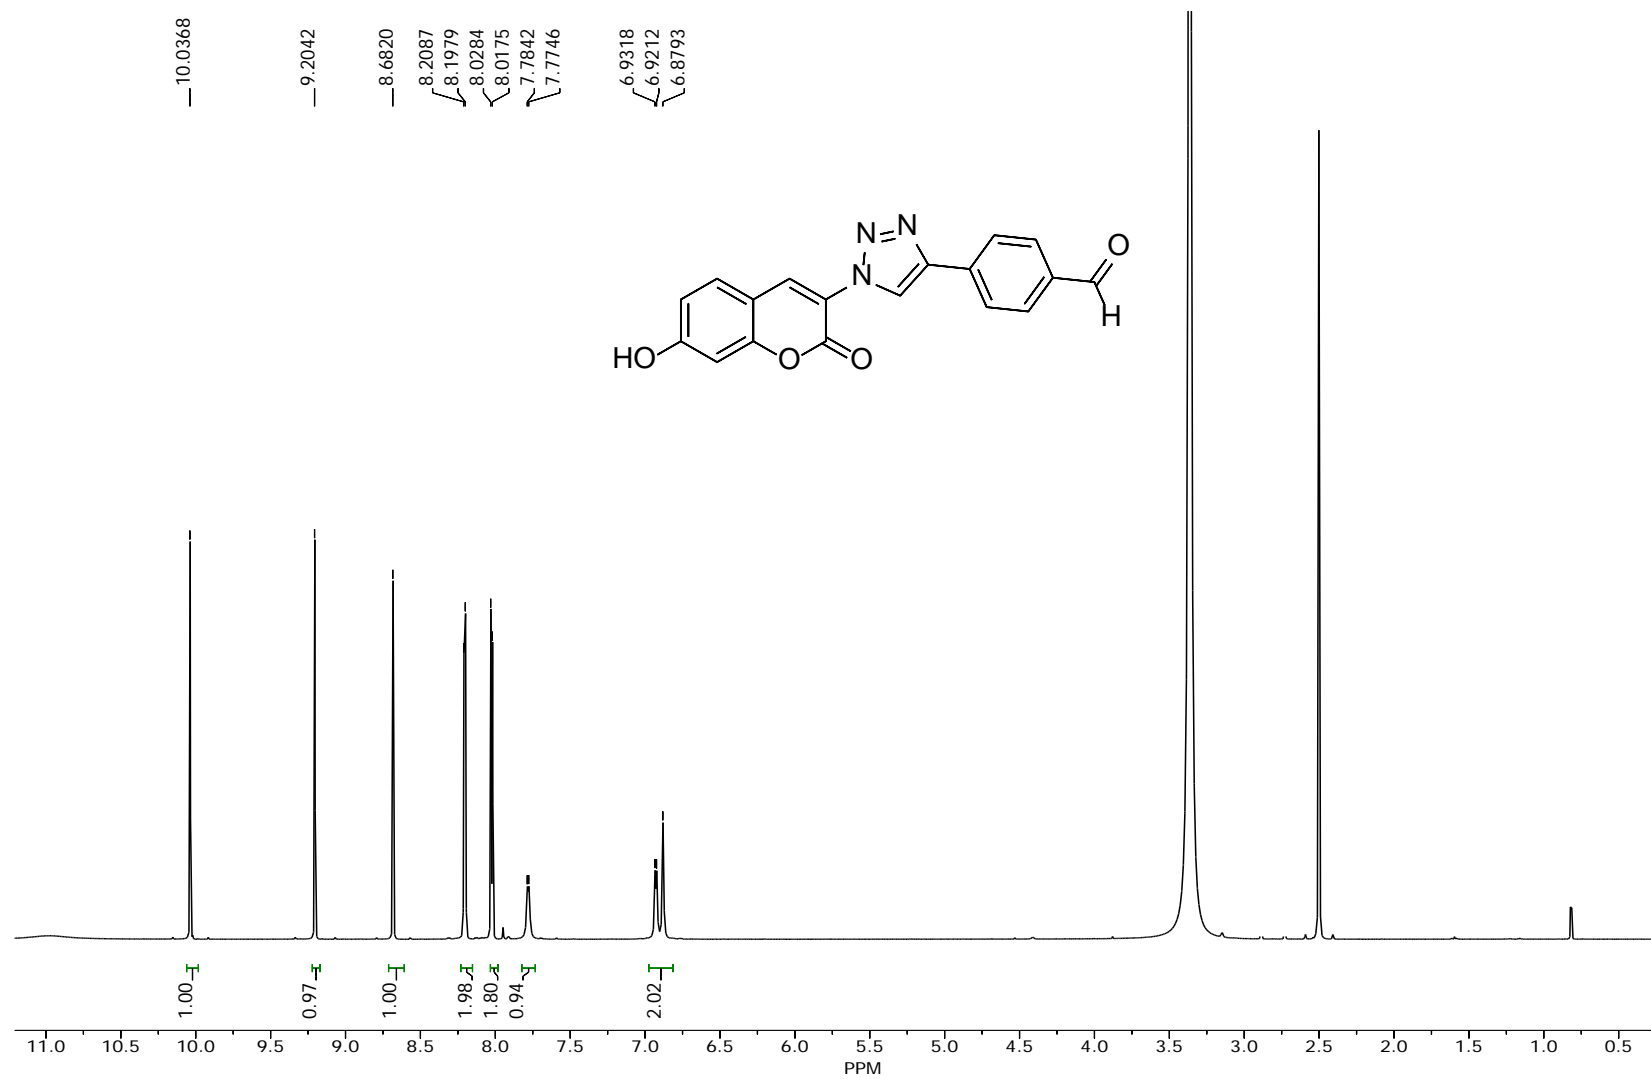

**Figure S13.** <sup>1</sup>H NMR (DMSO-*d*<sub>6</sub>, 750 MHz) spectrum of **1g**.

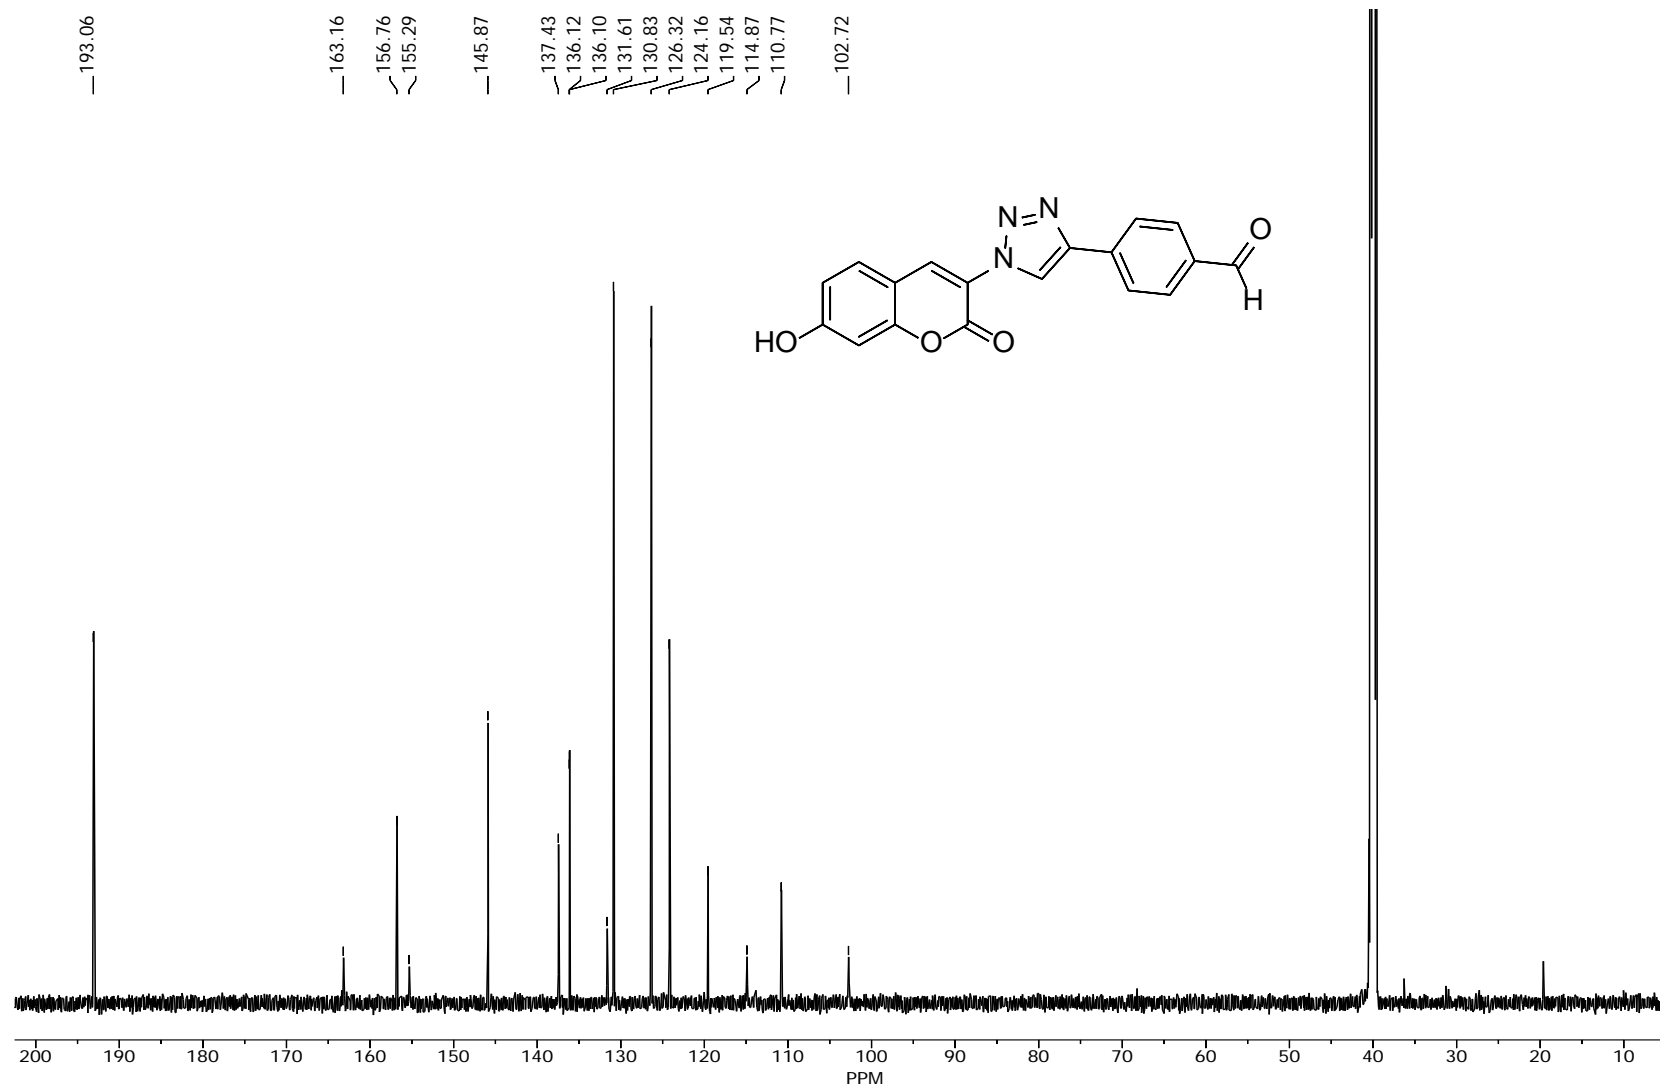

Figure S14. <sup>13</sup>C NMR (DMSO-*d*<sub>6</sub>, 188.6 MHz) spectrum of **1g**.

|             |           |                        |            |                 |                       |
|-------------|-----------|------------------------|------------|-----------------|-----------------------|
| Sample Name | 1118-6-7  | Position               | P1-E8      | Instrument Name | QTOF_MEDICINA_IPN     |
| User Name   |           | Inj Vol                | 10         | InjPosition     |                       |
| Sample Type | Sample    | IRM Calibration Status | Success    | Data Filename   | 1118-6-7_SU22011_1.d  |
| ACQ Method  | MS_ESID.m | Comment                | JECP-IPN38 | Acquired Time   | 1/22/2019 12:02:20 PM |

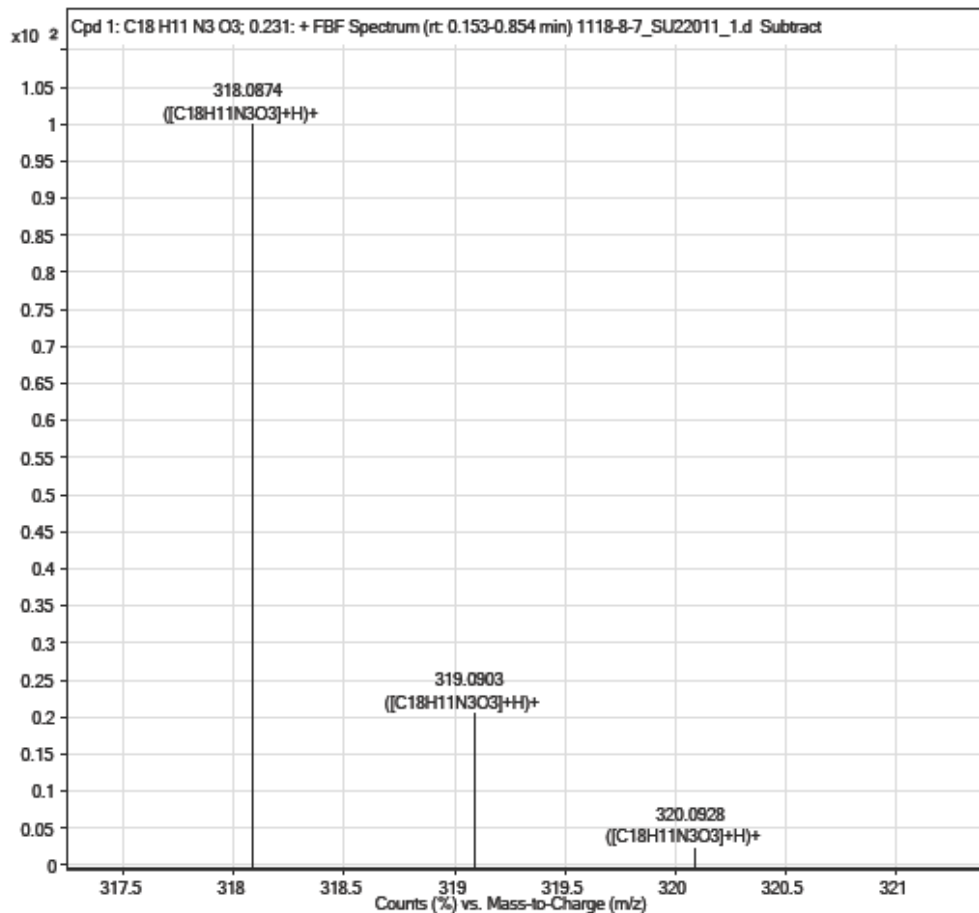

**Figure S15.** The HRMS mass spectrum of compound **1a**

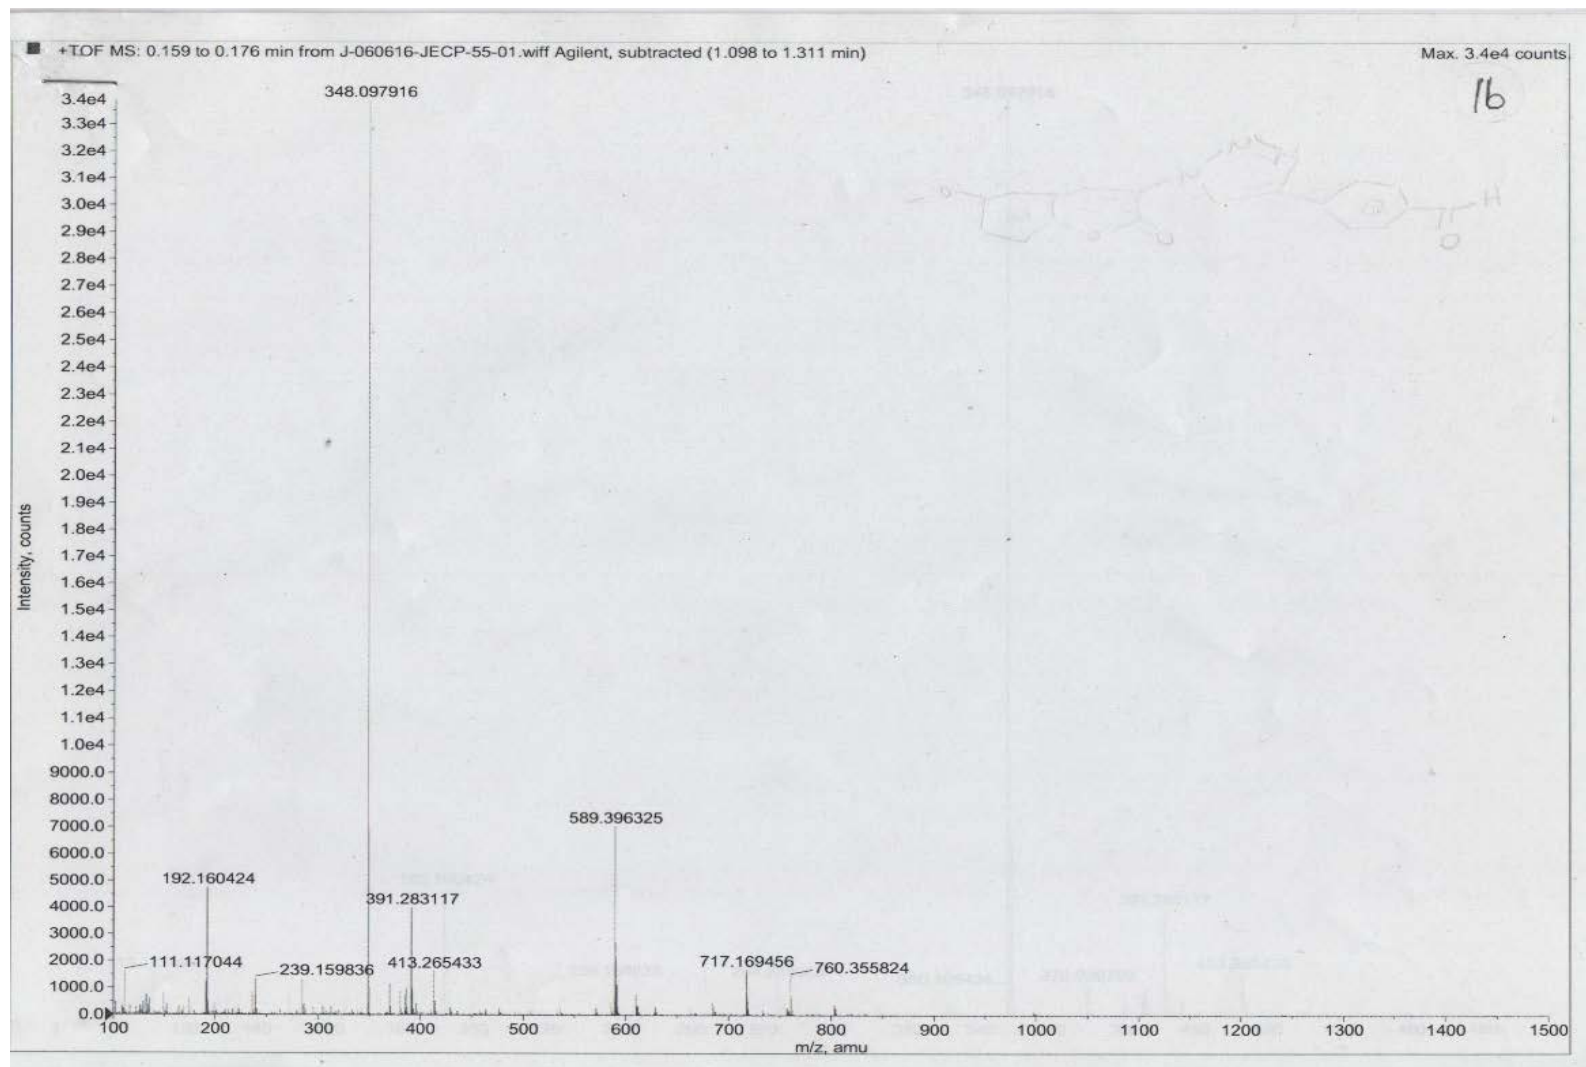

Figure S16. The HRMS mass spectrum of compound **1b**.

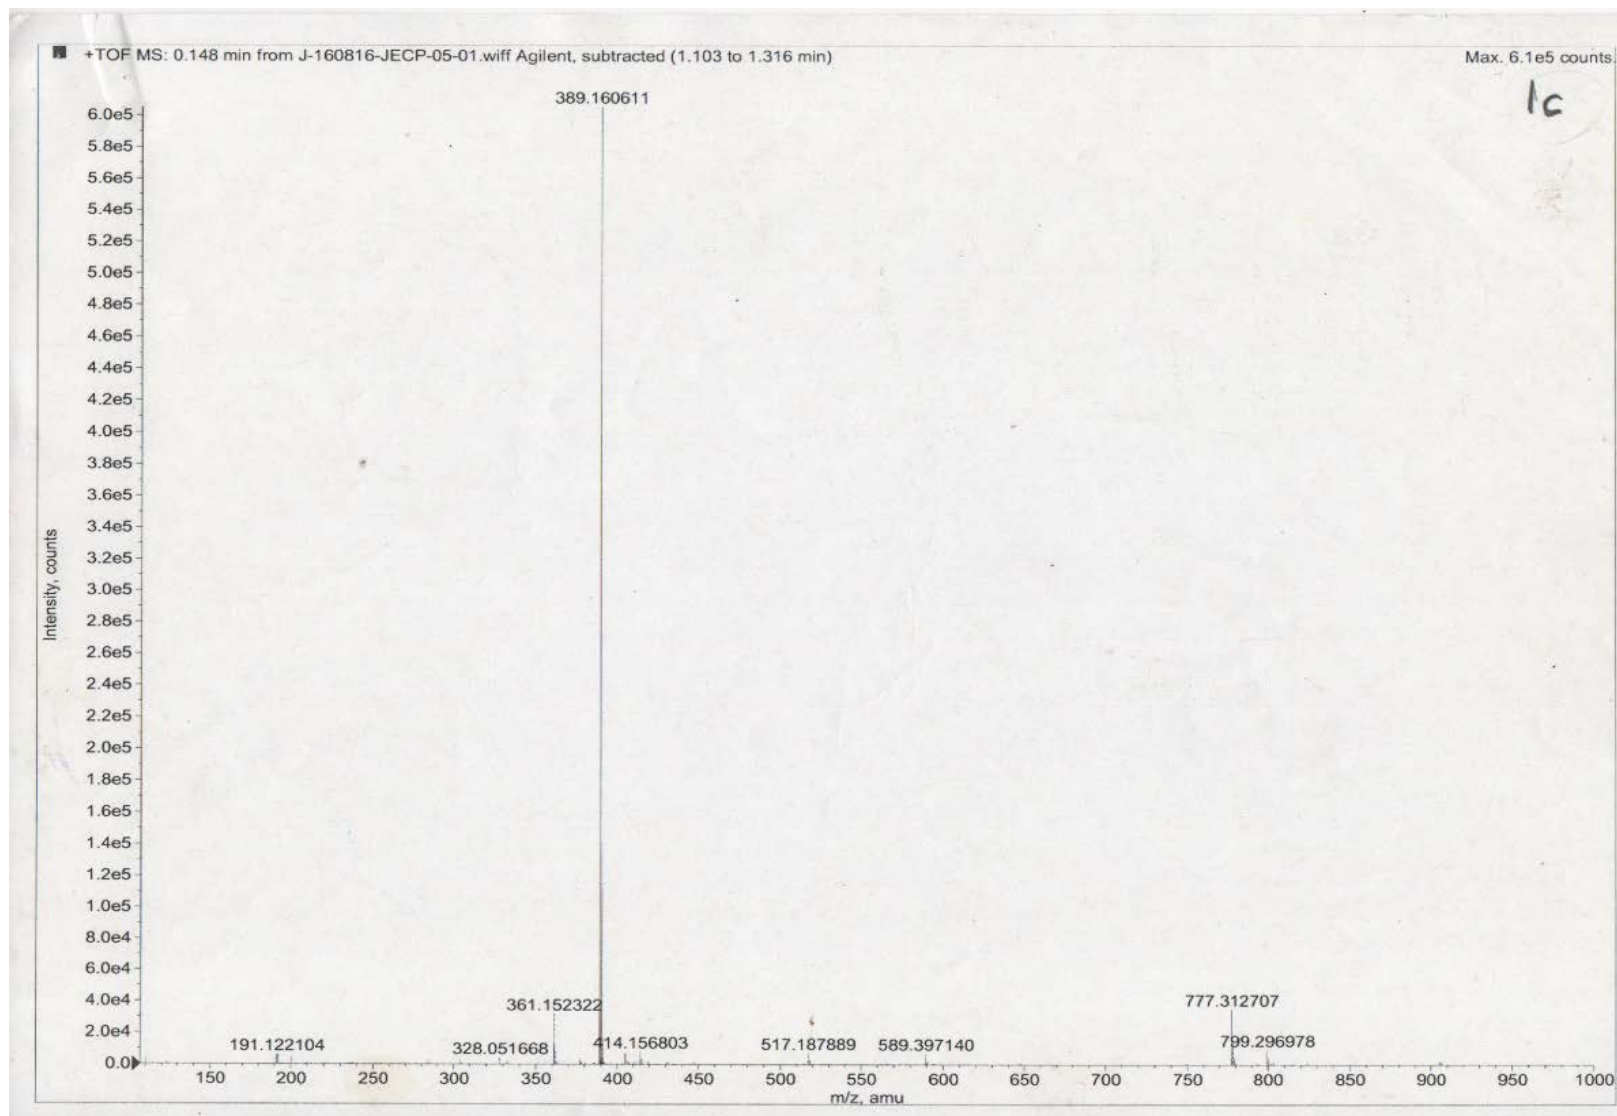

Figure S17. The HRMS mass spectrum of compound **1c**.

|             |           |                        |            |                 |                       |
|-------------|-----------|------------------------|------------|-----------------|-----------------------|
| Sample Name | 1118-8-8  | Position               | P1-E9      | Instrument Name | QTOF_MEDICINA_JPN     |
| User Name   |           | Inj Vol                | 10         | Inj Position    |                       |
| Sample Type | Sample    | IRM Calibration Status | Success    | Data Filename   | 1118-8-8_SU22011_1.d  |
| ACQ Method  | MS_ESID.m | Comment                | JECP-IPN56 | Acquired Time   | 1/22/2019 12:04:48 PM |

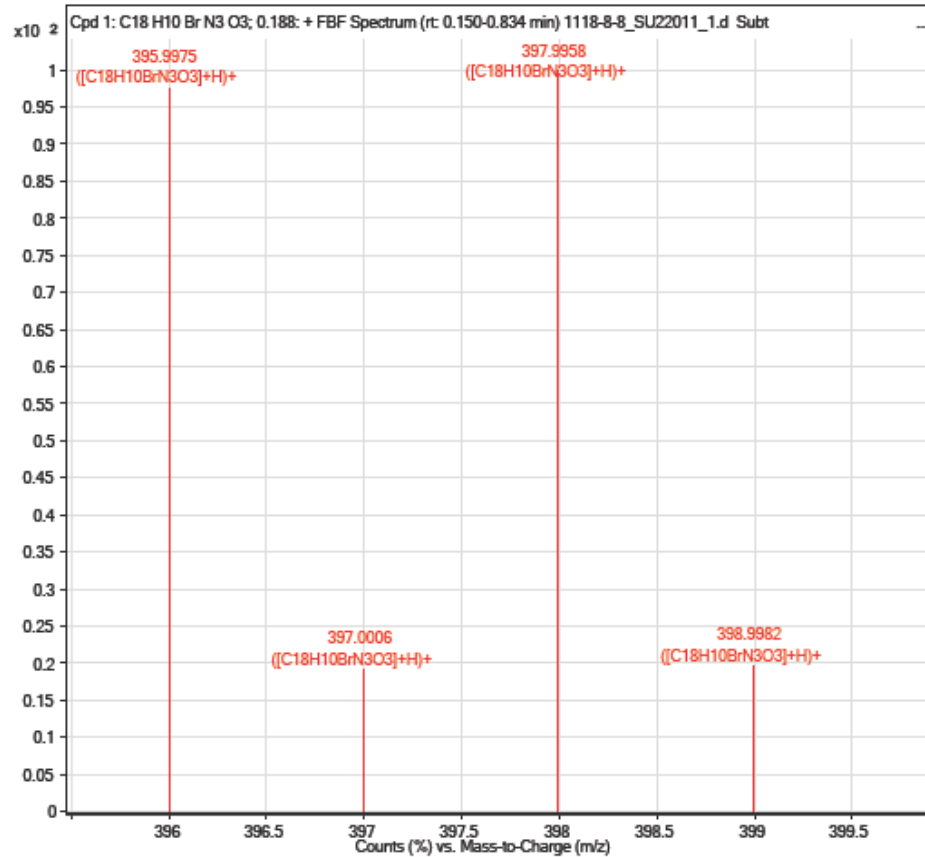

Figure S18. The HRMS mass spectrum of compound 1d.

|             |           |                        |            |                 |                       |
|-------------|-----------|------------------------|------------|-----------------|-----------------------|
| Sample Name | 1118-8-10 | Position               | P1-E11     | Instrument Name | QTOF_MEDICINA_IPN     |
| User Name   |           | Inj Vol                | 10         | InjPosition     |                       |
| Sample Type | Sample    | IRM Calibration Status | Success    | Data Filename   | 1118-8-10_SU22011_1.d |
| ACQ Method  | MS_ESI0.m | Comment                | JECP-IPN65 | Acquired Time   | 1/22/2019 12:09:42 PM |

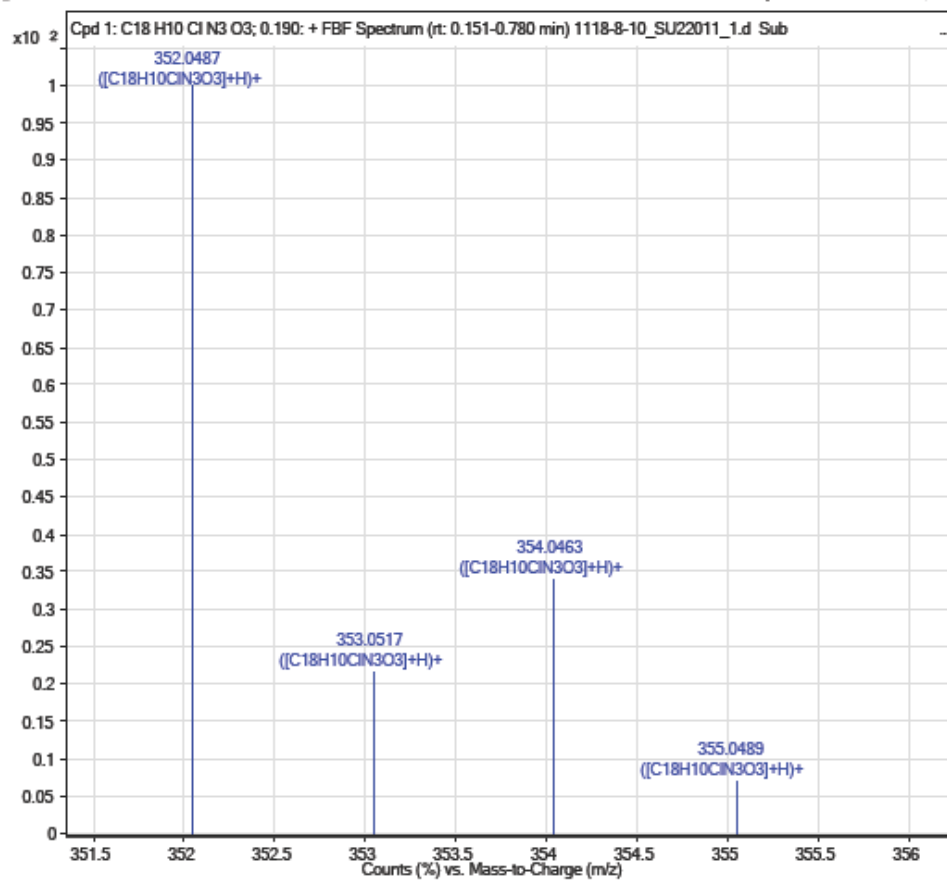

Figure S19. The HRMS mass spectrum of compound 1e.

## Display Report

**Analysis Info**  
Analysis Name: D:\Data\Izlia Irene Padilla Martinez\022219\_JECP-86\_d  
Method: Tune low 25-sep-2018.m  
Sample Name: 022219\_JECP-86\_  
Comment:  
Acquisition Date: 2/22/2019 1:55:48 PM  
Operator: Daniel Arrieta  
Instrument: micrOTOF-Q 228888.10392

**Acquisition Parameter**  
Source Type: ESI  
Focus: Active  
Scan Begin: 50 m/z  
Scan End: 3000 m/z  
Ion Polarity: Positive  
Set Capillary: 4500 V  
Set End Plate Offset: -500 V  
Set Collision Cell RF: 150.0 Vpp  
Set Nebulizer: 0.4 Bar  
Set Dry Heater: 180 °C  
Set Dry Gas: 4.0 l/min  
Set Divert Valve: Source

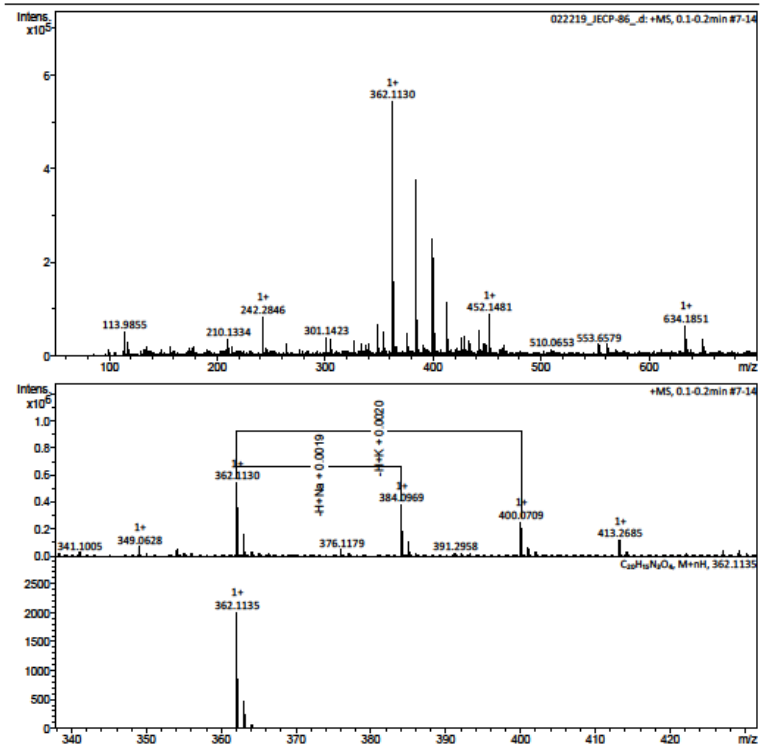

Bruker Compass DataAnalysis 4.1 printed: 2/25/2019 10:36:39 AM by: Daniel Arrieta Page 1 of 1

Figure S20. The HRMS mass spectrum of compound **1f**.



|             |           |                        |            |                 |                       |
|-------------|-----------|------------------------|------------|-----------------|-----------------------|
| Sample Name | 1118-8-9  | Position               | P1-E10     | Instrument Name | QTOF_MEDICINA_IPN     |
| User Name   |           | Inj Vol                | 10         | Inj Position    |                       |
| Sample Type | Sample    | IRM Calibration Status | Success    | Data Filename   | 1118-8-9_SU22011_2.d  |
| ACQ Method  | MS_ESID.m | Comment                | JECF-IPN57 | Acquired Time   | 1/22/2019 12:07:15 PM |

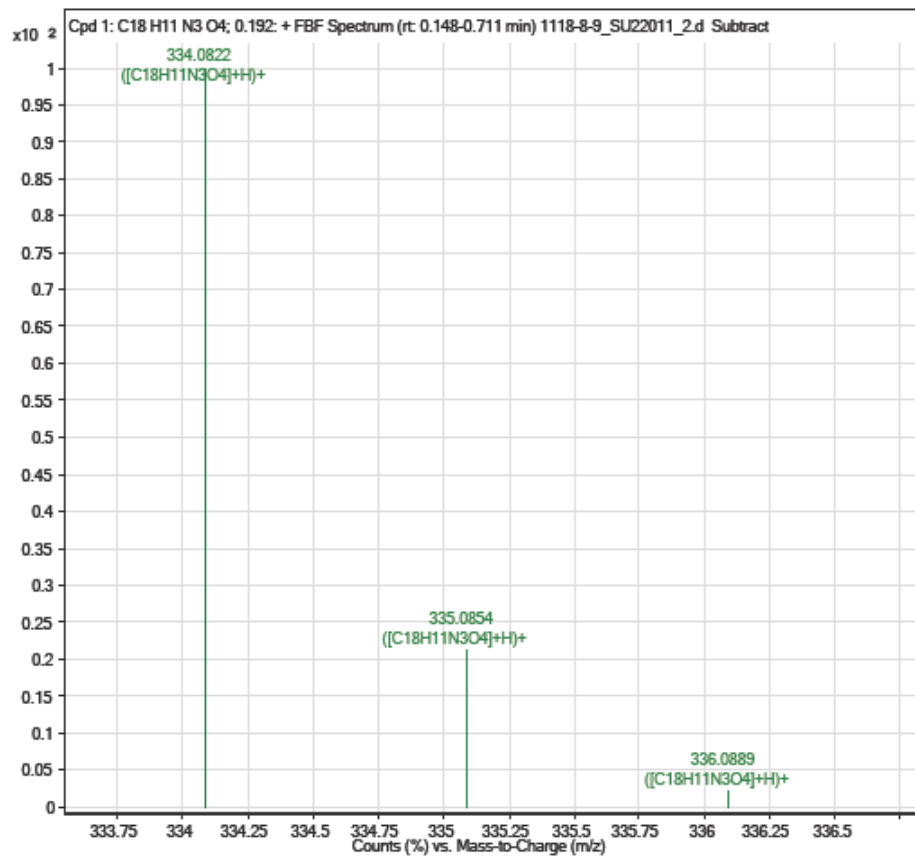

**Figure S21.** The HRMS mass spectrum of compound **1g**.

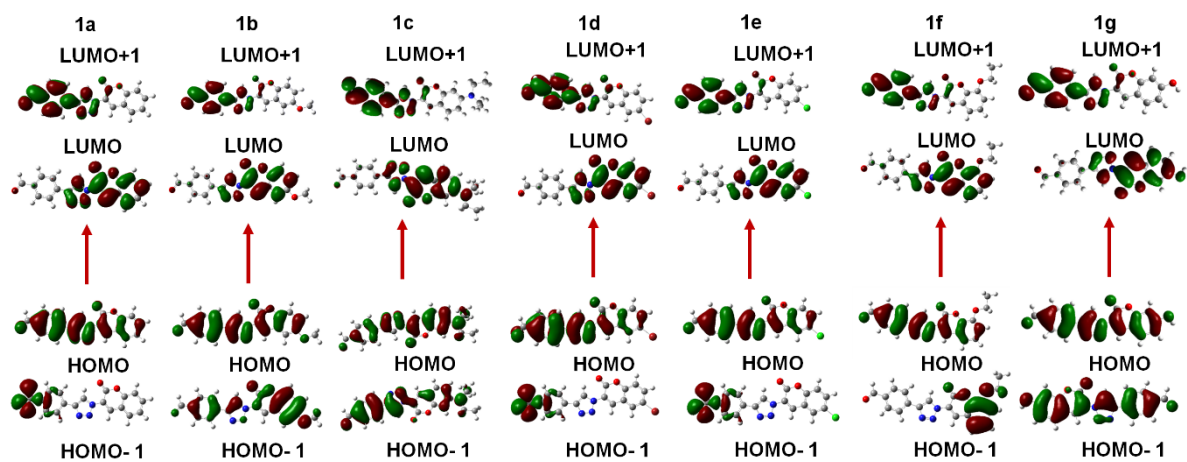

**Figure S22.** Isosurfaces of the HOMO, LUMO, HOMO-1 and LUMO+1 orbitals of **1a-g**.

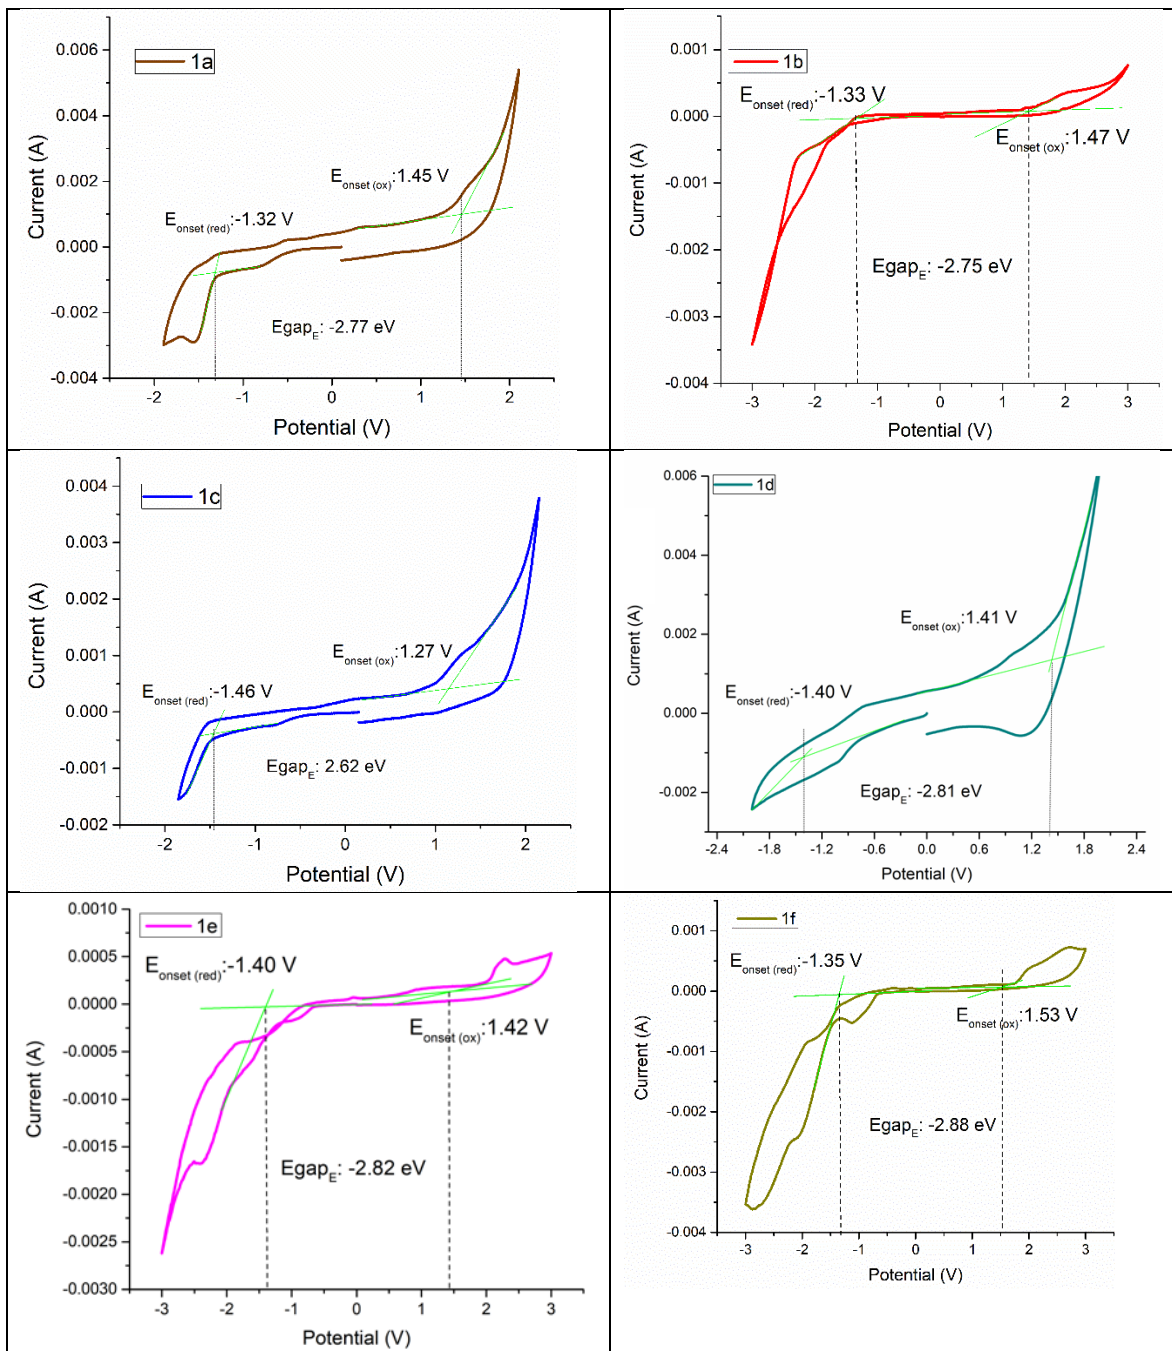

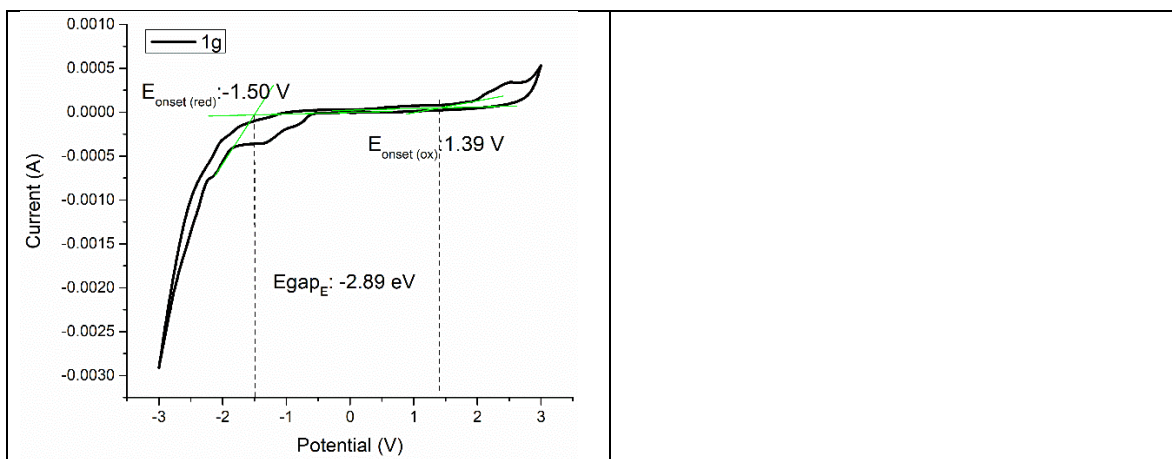

Figure S23. Individual cyclic voltammograms of compounds 1a-g.

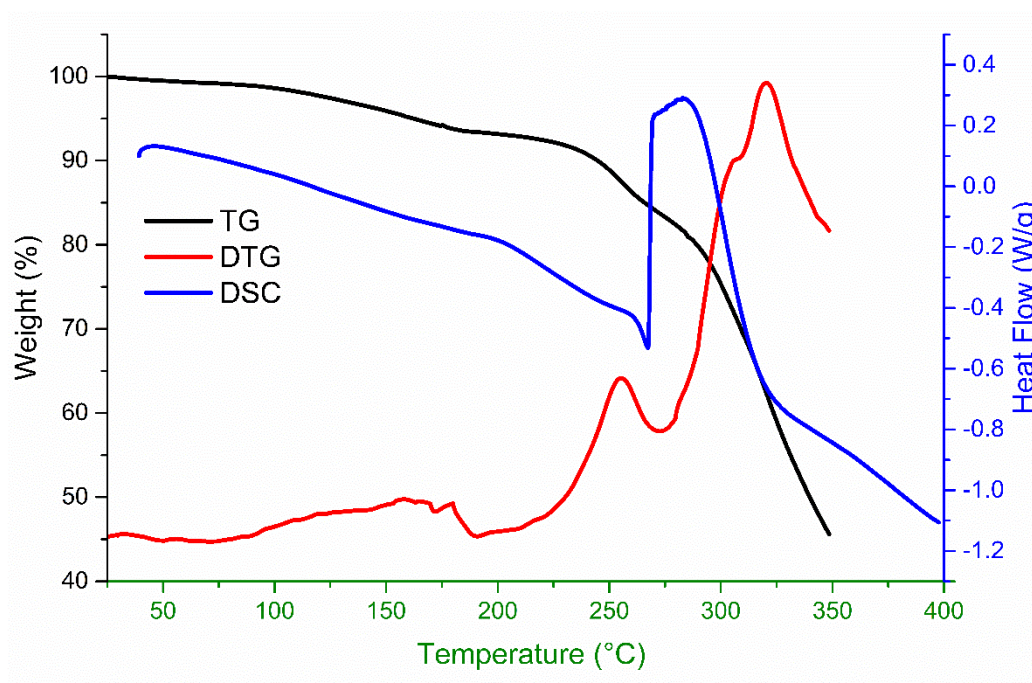

Figure S24. Thermal characterization of compound 1a.

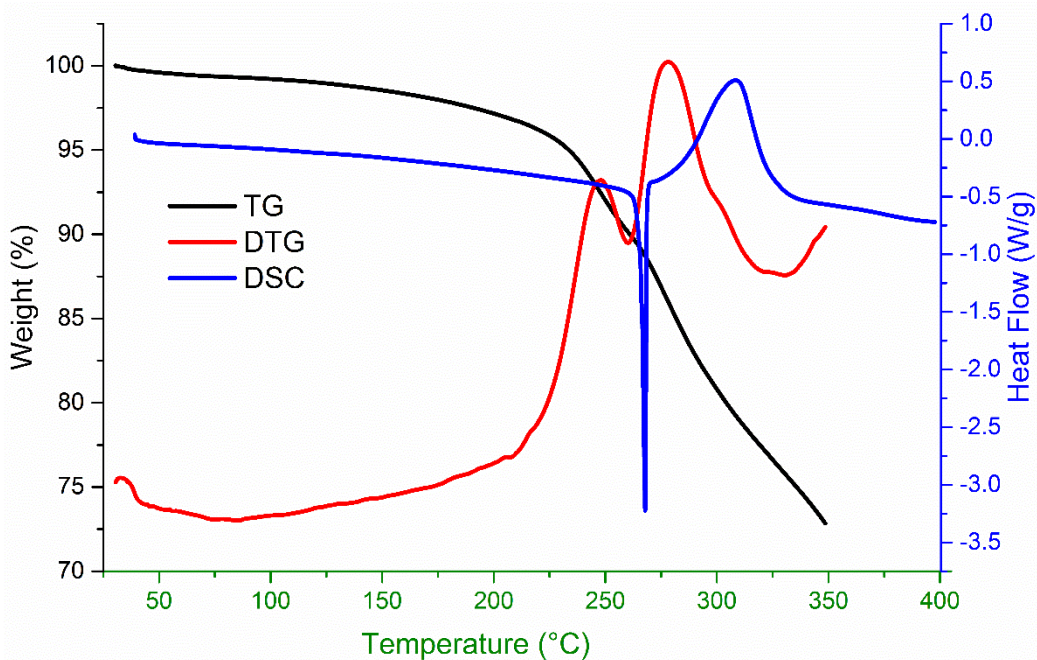

Figure S25. Thermal characterization of compound 1b.

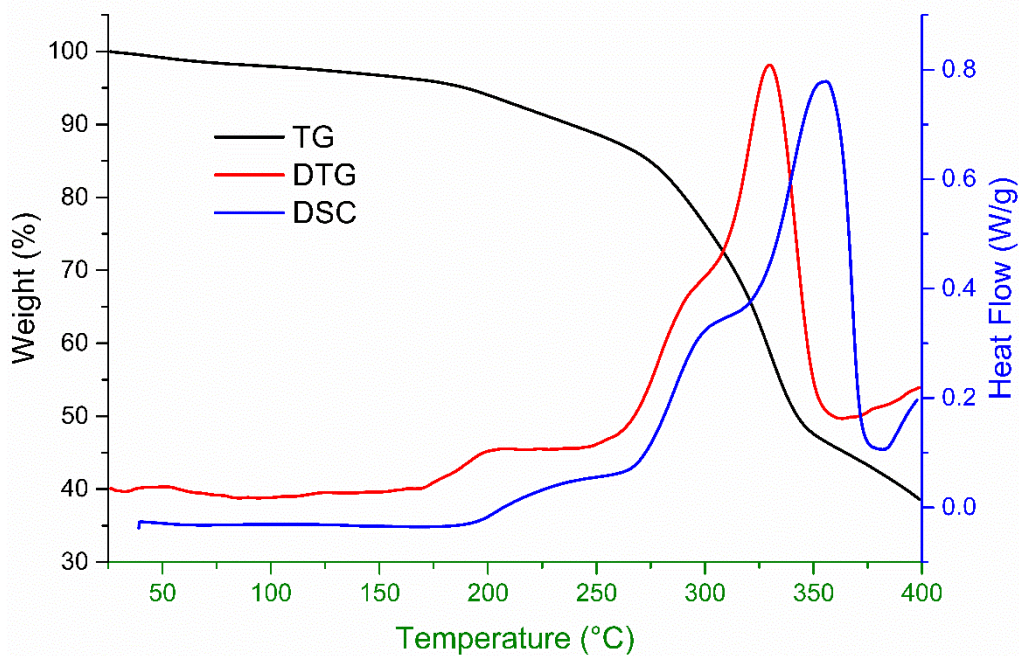

Figure S26. Thermal characterization of compound 1c.

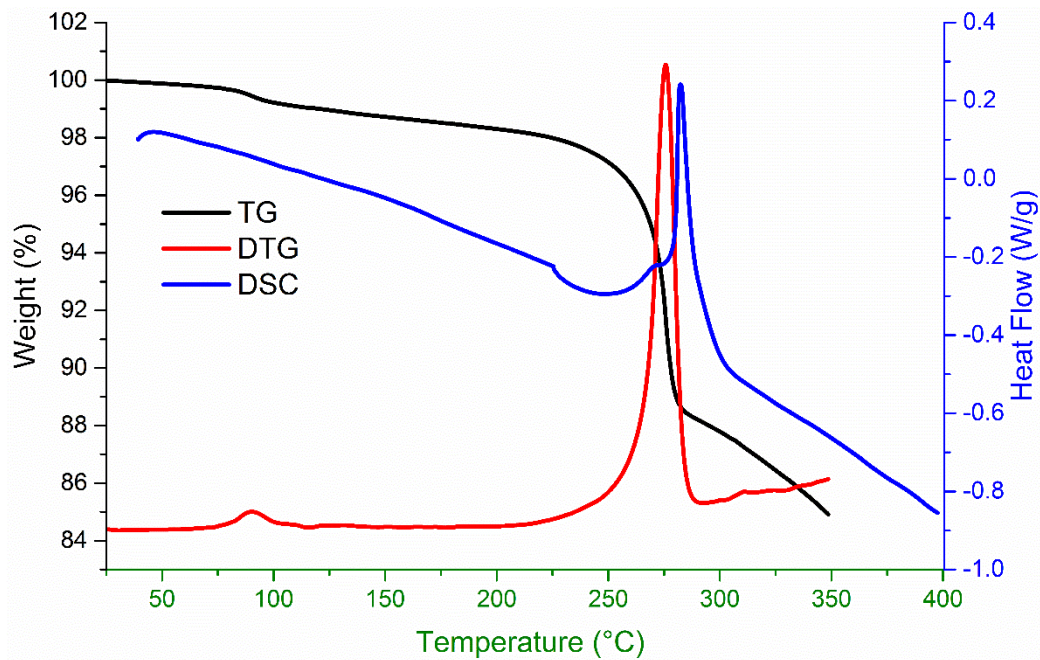

Figure S27. Thermal characterization of compound 1d.

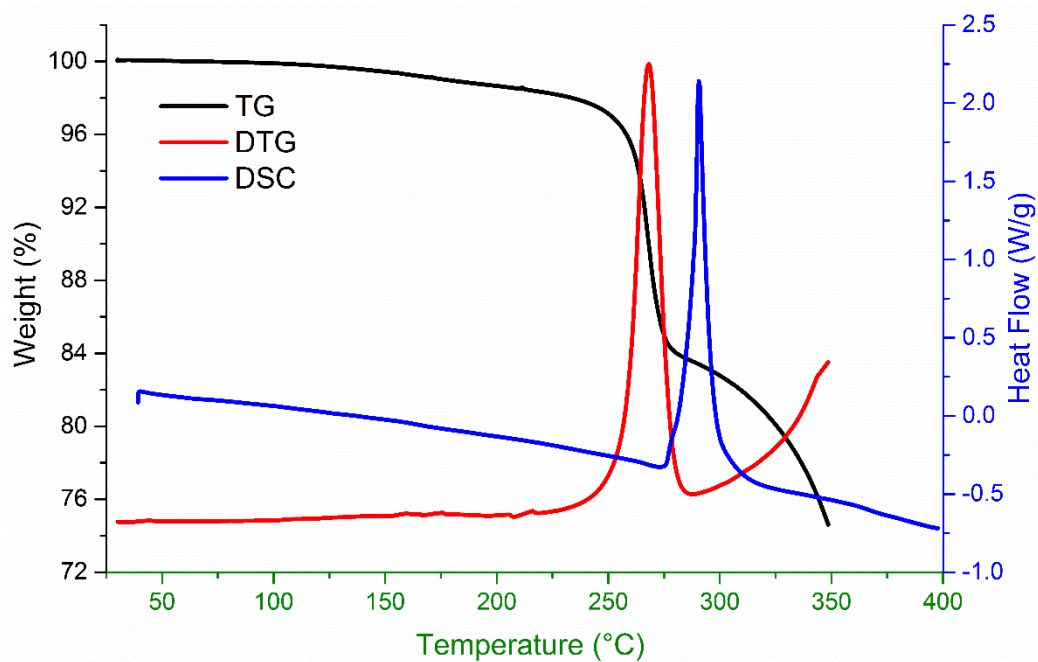

Figure S28. Thermal characterization of compound 1e.

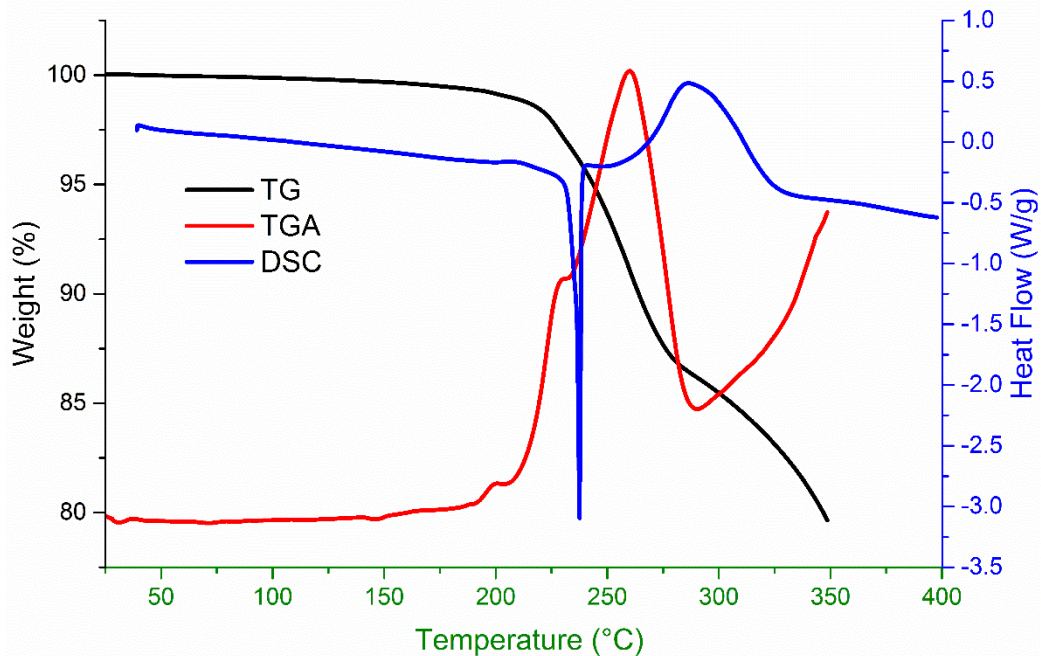

Figure S29. Thermal characterization of compound 1f.

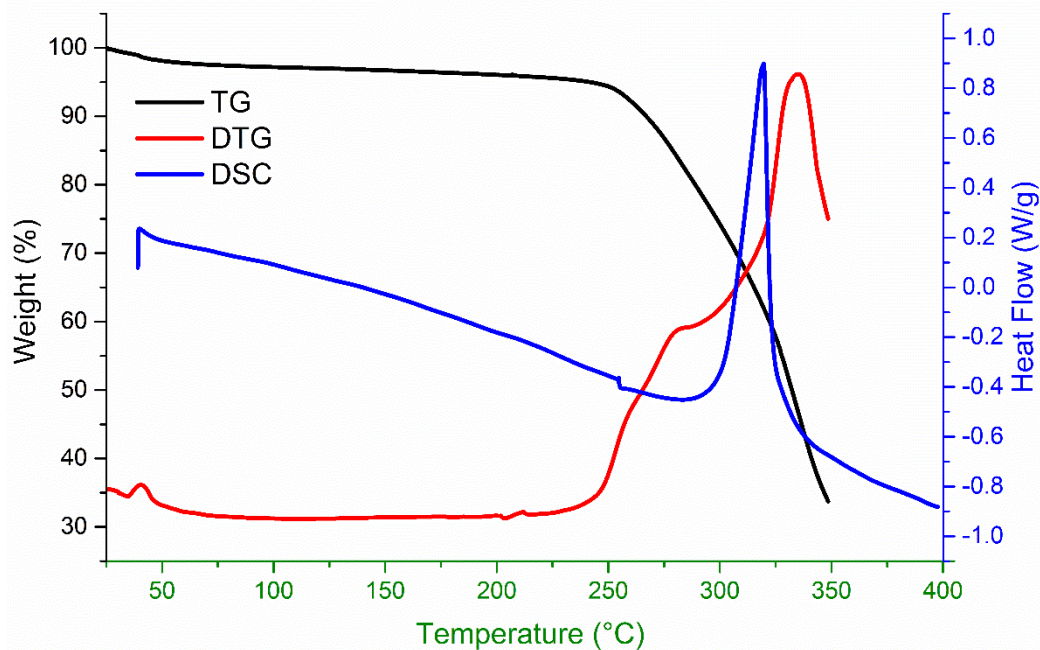

Figure S30. Thermal characterization of compound 1g.
